# Supplementary material for: The clinical utility of Nanopore 16S rRNA gene sequencing for direct bacterial identification in normally sterile body fluids
Source: Front Microbiol. 2024 Jan 9;14:1324494. doi: 10.3389/fmicb.2023.1324494 (PMC10803466; doi:10.3389/fmicb.2023.1324494)
Supplement: Supplementary file 2 [file Table_2.xlsx]

## Sheet: Epi2me_data
Supplementary 2 Twelve most abundant species of each sample classified by Epi2me
No. of cultured species	Sample ID	Total no. of classified reads	No. of classified species	Organism 1			Organism 2			Organism 3			Organism 4			Organism 5			Organism 6			Organism 7			Organism 8			Organism 9			Organism 10			Organism 11			Organism 12
				ID	No. of reads	relative abundance	ID	No. of reads	relative abundance	ID	No. of reads	relative abundance	ID	No. of reads	relative abundance	ID	No. of reads	relative abundance	ID	No. of reads	relative abundance	ID	No. of reads	relative abundance	ID	No. of reads	relative abundance	ID	No. of reads	relative abundance	ID	No. of reads	relative abundance	ID	No. of reads	relative abundance	ID	No. of reads	relative abundance
None	20MB069698	no reads	N/A
None	19MB067693	14	6	Methylobacterium aquaticum	3	0.214286	Granulicatella elegans	2	0.142857	Veillonella ratti	2	0.142857	Methylobacterium platani	2		Roseomonas mucosa	2	0.142857	Methylobacterium indicum	1	0.0714286
None	18MB380975	53	8	Methylobacterium indicum	23	0.433962	Methylobacterium platani	9	0.169811	Staphylococcus cohnii	8	0.150943	Jeotgalicoccus huakuii	5	0.0943396	Methylorubrum extorquens	3	0.0566038	Methylobacterium aquaticum	2	0.0377358	Rheinheimera japonica	2	0.0377358	Staphylococcus arlettae	1	0.0188679
None	19MB069145	4	2	Fusobacterium nucleatum	2	0.5	[Pseudomonas] hibiscicola	1	0.25			0			0			0			0			0
None	19MB068751	198	18	Staphylococcus epidermidis	48	0.242424	Staphylococcus hominis	40	0.20202	Staphylococcus cohnii	36	0.181818	Staphylococcus capitis	10	0.0505051	Methylobacterium aquaticum	5	0.0252525	Staphylococcus caprae	5	0.0252525	Diaphorobacter nitroreducens	4	0.020202	Salinicoccus salitudinis	4	0.020202	Methylobacterium indicum	3	0.0151515	Corynebacterium massiliense	2	0.010101	Acinetobacter lwoffii	1	0.00505051	Paracoccus marinus	1	0.00505051
None	18MB084305	2273	23	Streptococcus canis	2234	0.982842	Streptococcus panodentis	5	0.00219974	Streptococcus saliviloxodontae	3	0.00131984	Streptococcus dysgalactiae	2	0.000879894	Streptococcus ictaluri	2	0.000879894	Streptococcus infantis	2	0.000879894	Streptococcus iniae	2	0.000879894	Streptococcus urinalis	2	0.000879894	Methylobacterium aquaticum	1	0.000439947	Methylobacterium indicum	1	0.000439947	Streptococcus caballi	1	0.000439947	Streptococcus cristatus	1	0.000439947
None	19MB090618	79022	81	Streptococcus pneumoniae	76452	0.967477	Fusobacterium periodonticum	367	0.00464428	Campylobacter showae	275	0.00348004	Streptococcus australis	189	0.00239174	Streptococcus panodentis	171	0.00216395	Streptococcus pseudopneumoniae	153	0.00193617	Streptococcus mitis	131	0.00165777	Streptococcus constellatus	110	0.00139202	Streptococcus marmotae	82	0.00103769	Streptococcus sanguinis	72	0.000911139	Streptococcus cristatus	64	0.000809901	Streptococcus oralis	55	0.000696009
None	20MB068970	1071	35	Prevotella oris	383	0.35761	Lactobacillus delbrueckii	209	0.195145	Streptococcus anginosus	97	0.0905696	Streptococcus oralis	91	0.0849673	Moraxella osloensis	59	0.0550887	Streptococcus mitis	35	0.0326797	Haemophilus parainfluenzae	34	0.031746	Streptococcus salivarius	28	0.0261438	Streptococcus intermedius	25	0.0233427	Prevotella veroralis	22	0.0205415	Lactobacillus fermentum	14	0.0130719	Enterococcus faecium	12	0.0112045
None	19MB069360	61	4	Sporosarcina koreensis	12	0.196721	Methylobacterium indicum	12	0.196721	Methylobacterium aquaticum	6	0.0983607	Sporosarcina luteola	2	0.0327869
None	20MP2015465	2354	75	Methylobacterium marchantiae	425	0.180544	Sphingomonas hankookensis	416	0.17672	Paracoccus chinensis	203	0.0862362	Methylobacterium indicum	122	0.0518267	Methylobacterium aquaticum	119	0.0505523	Ochrobactrum lupini	94	0.039932	Pseudomonas oleovorans	88	0.0373832	Pantoea allii	84	0.0356839	Methylobacterium bullatum	80	0.0339847	Exiguobacterium indicum	68	0.028887	Sphingomonas melonis	58	0.0246389	Methylobacterium platani	46	0.0195412
None	20MP2015461	564	38	Enterococcus cecorum	105	0.18617	Staphylococcus aureus	81	0.143617	Methylobacterium indicum	64	0.113475	Methylobacterium marchantiae	63	0.111702	Enterococcus gallinarum	45	0.0797872	Methylobacterium platani	28	0.0496454	Methylobacterium aquaticum	16	0.0283688	Moraxella osloensis	15	0.0265957	Cutibacterium acnes	12	0.0212766	Streptococcus australis	11	0.0195035	Paracoccus chinensis	9	0.0159574	Brevundimonas vesicularis	7	0.0124113
None	20MP2015462	3718	78	Sphingomonas roseiflava	386	0.103819	Facklamia hominis	383	0.103012	Methylobacterium marchantiae	360	0.0968263	Sphingomonas hankookensis	288	0.077461	Methylobacterium platani	234	0.0629371	Methylobacterium indicum	187	0.0502959	Methylobacterium aquaticum	183	0.04922	Methylorubrum populi	152	0.0408822	Acinetobacter johnsonii	151	0.0406132	Pseudoxanthomonas taiwanensis	137	0.0368478	Methylobacterium gregans	112	0.0301237	Staphylococcus hominis	108	0.0290479
Polymicrobial	20MP2013809	300399	87	Streptococcus anginosus	284347	0.946564	Prevotella denticola	11706	0.0389682	Streptococcus intermedius	653	0.00217378	Streptococcus troglodytidis	482	0.00160453	Streptococcus pasteurianus	447	0.00148802	Streptococcus gordonii	260	0.000865516	Streptococcus equinus	209	0.000695741	Fusobacterium nucleatum	199	0.000662452	Streptococcus constellatus	185	0.000615848	Streptococcus massiliensis	184	0.000612519	Streptococcus equi	168	0.000559256	Streptococcus macedonicus	163	0.000542612
Monomicrobial	20MP2014075	6263	50	Burkholderia cepacia	3620	0.577998	Burkholderia metallica	1092	0.174357	Burkholderia lata	286	0.045665	Burkholderia contaminans	268	0.042791	Burkholderia seminalis	105	0.0167651	Paracoccus chinensis	78	0.0124541	Burkholderia ambifaria	55	0.00878173	Methylobacterium aquaticum	38	0.00606738	Burkholderia latens	31	0.0049497	Methylobacterium indicum	22	0.00351269	Methylobacterium platani	21	0.00335303	Burkholderia stagnalis	13	0.00207568
Monomicrobial	20MP2014874	2228	60	Paracoccus chinensis	227	0.101885	Staphylococcus capitis	214	0.0960503	Methylobacterium indicum	162	0.072711	Moraxella osloensis	125	0.0561041	Staphylococcus aureus	95	0.0426391	Paracoccus marinus	60	0.02693	Paracoccus huijuniae	47	0.0210952	Sphingomonas qilianensis	44	0.0197487	Staphylococcus caprae	43	0.0192998	Methylobacterium platani	37	0.0166068	Mycobacterium tuberculosis	35	0.0157092	Staphylococcus saccharolyticus	34	0.0152603
Polymicrobial	20MP2014925	10867	97	Staphylococcus aureus	531	0.0488635	Staphylococcus capitis	339	0.0311954	Shigella sonnei	185	0.017024	Methylobacterium aquaticum	113	0.0103985	Methylorubrum populi	110	0.0101224	Staphylococcus caprae	106	0.0097543	Escherichia fergusonii	85	0.00782185	Paracoccus chinensis	68	0.00625748	Methylobacterium indicum	45	0.00414098	Shigella flexneri	40	0.00368087	Staphylococcus saccharolyticus	35	0.00322076	Escherichia marmotae	17	0.00156437
Monomicrobial	20MP2014868	748	18	Methylobacterium indicum	125	0.167112	Pseudomonas aeruginosa	19	0.0254011	Methylobacterium platani	14	0.0187166	Staphylococcus haemolyticus	12	0.0160428	Methylobacterium aquaticum	10	0.013369	Sphingomonas hankookensis	10	0.013369	Escherichia fergusonii	8	0.0106952	Shigella sonnei	6	0.00802139	Acinetobacter baumannii	6	0.00802139	Shigella flexneri	4	0.00534759	Escherichia marmotae	2	0.0026738	Citrobacter koseri	2	0.0026738
Monomicrobial	20MP4201137	300209	147	Pseudomonas aeruginosa	292325	0.973738	Pseudomonas alcaligenes	823	0.00274142	Pseudomonas stutzeri	623	0.00207522	Pseudomonas otitidis	613	0.00204191	Pseudomonas resinovorans	538	0.00179208	Pseudomonas citronellolis	333	0.00110923	Pseudomonas oryzihabitans	286	0.00095267	Pseudomonas nitroreducens	258	0.000859401	Pseudomonas oleovorans	211	0.000702844	Pseudomonas glareae	209	0.000696182	Pseudomonas indica	133	0.000443025	Pseudomonas mendocina	111	0.000369742
Polymicrobial	19B1413481	169824	208	Streptococcus salivarius	49053	0.288846	Streptococcus intermedius	33031	0.194501	Peptostreptococcus stomatis	24262	0.142866	Veillonella parvula	17172	0.101116	Streptococcus anginosus	14229	0.0837867	Streptococcus gordonii	5749	0.0338527	Veillonella dispar	5102	0.0300429	Klebsiella pneumoniae	2950	0.0173709	Haemophilus parainfluenzae	2138	0.0125895	Paraclostridium benzoelyticum	2005	0.0118063	Streptococcus parasanguinis	1856	0.010929	Parvimonas micra	1508	0.00887978
Polymicrobial	19B1413498	119926	123	Parvimonas micra	71700	0.597869	Streptococcus intermedius	11184	0.0932575	Streptococcus constellatus	10209	0.0851275	Peptostreptococcus stomatis	6529	0.0544419	Streptococcus anginosus	5513	0.04597	Gemella morbillorum	4345	0.0362307	[Eubacterium] infirmum	2964	0.0247152	Phascolarctobacterium faecium	1300	0.01084	Pyramidobacter piscolens	1038	0.00865534	Mogibacterium timidum	551	0.0045945	Eubacterium callanderi	535	0.00446108	Eubacterium limosum	446	0.00371896
Monomicrobial	19B1414530	167623	79	Staphylococcus aureus	160925	0.960041	Staphylococcus caprae	1154	0.0068845	Staphylococcus petrasii	665	0.00396724	Staphylococcus hominis	491	0.00292919	Staphylococcus simiae	421	0.00251159	Staphylococcus haemolyticus	298	0.0017778	Staphylococcus piscifermentans	231	0.00137809	Staphylococcus saccharolyticus	223	0.00133037	Staphylococcus xylosus	179	0.00106787	Staphylococcus devriesei	161	0.000960489	Staphylococcus cohnii	139	0.000829242	Staphylococcus epidermidis	136	0.000811345
Polymicrobial	19B1584185	197285	310	Parvimonas micra	60466	0.306491	Peptostreptococcus stomatis	51789	0.262509	Comamonas terrigena	26897	0.136336	Filifactor alocis	11900	0.0603188	Comamonas phosphati	4132	0.0209443	[Clostridium] viride	1878	0.00951922	Porphyromonas gingivalis	1359	0.00688851	Ihubacter massiliensis	1349	0.00683782	Phascolarctobacterium faecium	1314	0.00666042	Comamonas jiangduensis	1070	0.00542363	Faecalibacterium prausnitzii	985	0.00499278	Pyramidobacter piscolens	746	0.00378133
Polymicrobial	19B1591103	91990	64	Parvimonas micra	84035	0.913523	Peptostreptococcus stomatis	6431	0.0699098	Streptococcus intermedius	544	0.00591369	Streptococcus constellatus	158	0.00171758	Mogibacterium timidum	122	0.00132623	Phascolarctobacterium faecium	110	0.00119578	Peptostreptococcus anaerobius	55	0.000597891	Streptococcus anginosus	42	0.000456571	Eubacterium limosum	42	0.000456571	Dialister pneumosintes	41	0.000445701	[Eubacterium] infirmum	32	0.000347864	Comamonas terrigena	31	0.000336993
Monomicrobial	19B1591110	64180	67	Staphylococcus aureus	61662	0.960767	Staphylococcus caprae	400	0.00623247	Staphylococcus petrasii	268	0.00417576	Staphylococcus hominis	208	0.00324089	Staphylococcus simiae	165	0.00257089	Staphylococcus haemolyticus	126	0.00196323	Staphylococcus piscifermentans	78	0.00121533	Staphylococcus saccharolyticus	72	0.00112184	Staphylococcus cohnii	68	0.00105952	Staphylococcus epidermidis	67	0.00104394	Staphylococcus xylosus	64	0.000997195	Staphylococcus sciuri	50	0.000779059
Monomicrobial	19B1592898	204945	136	Staphylococcus aureus	195041	0.951675	Staphylococcus caprae	1447	0.00706043	Staphylococcus petrasii	815	0.00397668	Staphylococcus hominis	639	0.00311791	Staphylococcus simiae	523	0.0025519	Staphylococcus haemolyticus	467	0.00227866	Staphylococcus piscifermentans	285	0.00139062	Gemella haemolysans	238	0.00116129	Staphylococcus saccharolyticus	216	0.00105394	Staphylococcus xylosus	214	0.00104418	Staphylococcus epidermidis	186	0.000907561	Staphylococcus devriesei	184	0.000897802
Polymicrobial	19B1608526	86839	122	Parvimonas micra	37517	0.432029	Gemella morbillorum	11236	0.129389	[Eubacterium] nodatum	10661	0.122767	Peptostreptococcus stomatis	9445	0.108764	Fusobacterium necrophorum	5145	0.0592476	Streptococcus oralis	4373	0.0503576	[Eubacterium] minutum	2534	0.0291804	Streptococcus sanguinis	2075	0.0238948	Streptococcus mitis	525	0.00604567	Peptostreptococcus anaerobius	340	0.00391529	Mogibacterium neglectum	304	0.00350073	Streptococcus infantis	293	0.00337406
Polymicrobial	19B1610381	294754	115	Parvimonas micra	261712	0.8879	Streptococcus constellatus	23006	0.0780515	Peptostreptococcus stomatis	3064	0.0103951	Klebsiella pneumoniae	1806	0.00612714	Streptococcus anginosus	1683	0.00570985	Fusobacterium nucleatum	1185	0.0040203	[Eubacterium] nodatum	671	0.00227647	Klebsiella quasipneumoniae	179	0.000607286	Ruthenibacterium lactatiformans	83	0.000281591	[Eubacterium] minutum	78	0.000264627	Streptococcus intermedius	71	0.000240879	Fusobacterium canifelinum	65	0.000220523
Monomicrobial	19B2123916	185223	85	Staphylococcus aureus	177865	0.960275	Staphylococcus caprae	1321	0.00713194	Staphylococcus petrasii	727	0.003925	Staphylococcus hominis	546	0.0029478	Staphylococcus simiae	448	0.00241871	Staphylococcus haemolyticus	339	0.00183023	Staphylococcus piscifermentans	261	0.00140911	Staphylococcus saccharolyticus	225	0.00121475	Staphylococcus xylosus	193	0.00104199	Staphylococcus epidermidis	187	0.00100959	Staphylococcus capitis	179	0.000966403	Staphylococcus sciuri	170	0.000917813
Polymicrobial	19B2135719	196851	375	Romboutsia timonensis	43743	0.222214	Clostridium perfringens	23194	0.117825	Clostridium paraputrificum	9160	0.0465327	Citrobacter koseri	8034	0.0408126	Gemmiger formicilis	7430	0.0377443	Morganella morganii	5492	0.0278993	Streptococcus parasanguinis	3244	0.0164795	Clostridium saudiense	3021	0.0153466	Bacteroides uniformis	2446	0.0124256	Shigella sonnei	1679	0.00852929	Bacteroides coprocola	1547	0.00785874	Eubacterium callanderi	1495	0.00759458
Polymicrobial	19B2024141	25544	178	Stenotrophomonas maltophilia	7877	0.30837	Corynebacterium striatum	5671	0.222009	Streptococcus anginosus	3743	0.146531	Streptococcus mitis	1882	0.0736768	Staphylococcus haemolyticus	1033	0.04044	Staphylococcus epidermidis	818	0.0320232	Streptococcus salivarius	768	0.0300658	Streptococcus constellatus	530	0.0207485	Mogibacterium timidum	477	0.0186737	Parvimonas micra	450	0.0176167	Pseudomonas aeruginosa	343	0.0134278	Fretibacterium fastidiosum	281	0.0110006
Polymicrobial	19B2146827	218325	217	Parvimonas micra	60457	0.276913	Peptostreptococcus stomatis	56274	0.257753	Streptococcus anginosus	24335	0.111462	Gemella morbillorum	23067	0.105654	Solobacterium moorei	7787	0.035667	Dialister pneumosintes	6275	0.0287416	Streptococcus dysgalactiae	3545	0.0162373	Mogibacterium timidum	2167	0.00992557	Pyramidobacter piscolens	1201	0.00550097	Catonella morbi	1011	0.00463071	Anaerostipes hadrus	910	0.0041681	Porphyromonas endodontalis	770	0.00352685
None	19B2153436	213555	88	Streptococcus intermedius	169246	0.792517	Parvimonas micra	33788	0.158217	Dialister pneumosintes	1684	0.00788556	Streptococcus constellatus	692	0.00324038	Campylobacter rectus	684	0.00320292	Streptococcus gordonii	375	0.00175599	Fusobacterium nucleatum	363	0.0016998	Streptococcus anginosus	356	0.00166702	Streptococcus sinensis	350	0.00163892	[Eubacterium] brachy	205	0.00095994	Streptococcus dentirousetti	133	0.00062279	Streptococcus troglodytidis	128	0.000599377
Monomicrobial	20B0927194	192681	90	Parvimonas micra	77612	0.4028	Streptococcus intermedius	72017	0.373763	Gemella morbillorum	33321	0.172934	Peptostreptococcus stomatis	6653	0.0345286	Gemella haemolysans	416	0.00215901	Streptococcus anginosus	362	0.00187875	Streptococcus constellatus	291	0.00151027	Streptococcus gordonii	249	0.00129229	Campylobacter concisus	214	0.00111064	Streptococcus ictaluri	202	0.00104836	Gemella sanguinis	189	0.000980896	Streptococcus sinensis	153	0.000794059
Monomicrobial	20B1025354	940	58	Klebsiella pneumoniae	274	0.291489	Parvimonas micra	134	0.142553	Moraxella osloensis	99	0.105319	Gemella morbillorum	75	0.0797872	Staphylococcus warneri	46	0.0489362	Peptostreptococcus stomatis	36	0.0382979	Streptococcus intermedius	31	0.0329787	Klebsiella quasipneumoniae	26	0.0276596	Staphylococcus haemolyticus	17	0.0180851	Staphylococcus capitis	10	0.0106383	Staphylococcus cohnii	9	0.00957447	Paracoccus sanguinis	8	0.00851064
None	19B2153759	1035	43	Parvimonas micra	477	0.46087	Streptococcus constellatus	155	0.149758	Cutibacterium acnes	48	0.0463768	Peptostreptococcus stomatis	31	0.0299517	Comamonas terrigena	28	0.0270531	Methylobacterium marchantiae	23	0.0222222	Sphingomonas hankookensis	23	0.0222222	Leuconostoc carnosum	22	0.021256	Acinetobacter junii	9	0.00869565	Methylobacterium hispanicum	7	0.00676329	Sphingomonas panni	7	0.00676329	Sphingomonas melonis	6	0.0057971
Monomicrobial	21B0926485	308571	179	Streptococcus agalactiae	298899	0.968656	Acinetobacter schindleri	1364	0.00442038	Streptococcus suis	1155	0.00374306	Streptococcus dysgalactiae	911	0.00295232	Streptococcus iniae	574	0.00186019	Streptococcus phocae	322	0.00104352	Streptococcus plurextorum	298	0.000965742	Streptococcus anginosus	265	0.000858797	Streptococcus gallinaceus	237	0.000768057	Brevundimonas vesicularis	210	0.000680557	Streptococcus pseudoporcinus	206	0.000667594	Streptococcus oralis	194	0.000628705
Monomicrobial	21B0926409	16246	74	Staphylococcus aureus	15268	0.939801	Staphylococcus caprae	77	0.00473963	Staphylococcus petrasii	60	0.00369322	Staphylococcus epidermidis	58	0.00357011	Streptococcus anginosus	42	0.00258525	Enterococcus faecium	40	0.00246214	Streptococcus pasteurianus	39	0.00240059	Staphylococcus simiae	34	0.00209282	Novosphingobium subterraneum	31	0.00190816	Staphylococcus hominis	29	0.00178505	Staphylococcus piscifermentans	23	0.00141573	Staphylococcus haemolyticus	22	0.00135418
Monomicrobial	21B0921459	228835	89	Staphylococcus aureus	221305	0.967094	Staphylococcus caprae	910	0.00397666	Staphylococcus petrasii	731	0.00319444	Staphylococcus hominis	616	0.0026919	Staphylococcus simiae	468	0.00204514	Staphylococcus haemolyticus	303	0.0013241	Staphylococcus piscifermentans	274	0.00119737	Staphylococcus xylosus	236	0.00103131	Staphylococcus devriesei	202	0.000882732	Bacillus tropicus	179	0.000782223	Staphylococcus saccharolyticus	174	0.000760373	Staphylococcus sciuri	174	0.000760373
Monomicrobial	21B0935230	196099	85	Staphylococcus aureus	189140	0.964513	Staphylococcus caprae	1075	0.00548192	Staphylococcus petrasii	697	0.00355433	Staphylococcus hominis	471	0.00240185	Staphylococcus simiae	435	0.00221827	Staphylococcus haemolyticus	338	0.00172362	Staphylococcus saccharolyticus	252	0.00128507	Staphylococcus piscifermentans	236	0.00120347	Staphylococcus cohnii	162	0.000826113	Staphylococcus xylosus	160	0.000815914	Staphylococcus sciuri	155	0.000790417	Staphylococcus devriesei	152	0.000775119
Polymicrobial	21B1705131	329925	315	Parvimonas micra	188554	0.571506	Peptostreptococcus stomatis	29405	0.0891263	Enterococcus faecalis	18568	0.0562795	Streptococcus intermedius	13638	0.0413367	Enterococcus avium	8109	0.0245783	Dialister pneumosintes	7026	0.0212957	Dialister invisus	5014	0.0151974	Fusobacterium nucleatum	2481	0.00751989	Eggerthella lenta	1998	0.00605592	Shigella sonnei	1271	0.00385239	Mogibacterium timidum	1135	0.00344018	Enterococcus faecium	1004	0.00304312
Polymicrobial	21MB105254	96606	125	Klebsiella pneumoniae	52296	0.541333	Streptococcus agalactiae	36584	0.378693	Klebsiella quasipneumoniae	5028	0.0520465	Enterobacter cloacae	262	0.00271205	Streptococcus suis	174	0.00180113	Klebsiella aerogenes	167	0.00172867	Streptococcus dysgalactiae	94	0.000973024	Streptococcus iniae	66	0.000683187	Pectobacterium aroidearum	62	0.000641782	Kosakonia sacchari	59	0.000610728	Kosakonia oryzae	44	0.000455458	Streptococcus phocae	43	0.000445107
Monomicrobial	21MB105242	58408	82	Staphylococcus aureus	56071	0.959988	Bacillus altitudinis	237	0.00405766	Staphylococcus caprae	198	0.00338995	Staphylococcus petrasii	163	0.00279071	Staphylococcus simiae	119	0.00203739	Staphylococcus hominis	118	0.00202027	Bacillus xiamenensis	93	0.00159225	Haemophilus parainfluenzae	68	0.00116422	Staphylococcus haemolyticus	55	0.000941652	Staphylococcus piscifermentans	54	0.000924531	Staphylococcus xylosus	53	0.00090741	Staphylococcus cohnii	45	0.000770442
Monomicrobial	21MB060114	37770	79	Klebsiella pneumoniae	36401	0.963754	Enterobacter cloacae	202	0.00534816	Klebsiella aerogenes	84	0.00222399	Klebsiella quasipneumoniae	38	0.00100609	Pectobacterium aroidearum	37	0.000979613	Kosakonia sacchari	29	0.000767805	Kosakonia radicincitans	26	0.000688377	Tatumella terrea	19	0.000503045	Serratia marcescens	18	0.000476569	Kosakonia oryzae	11	0.000291236	Shimwellia blattae	11	0.000291236	Erwinia amylovora	11	0.000291236
Monomicrobial	D151144	231287	174	Shigella sonnei	3636	0.0157207	Escherichia fergusonii	997	0.00431066	Shigella flexneri	851	0.00367941	Kosakonia sacchari	313	0.0013533	Citrobacter koseri	260	0.00112414	Shimwellia blattae	188	0.000812843	Escherichia marmotae	117	0.000505865	Citrobacter amalonaticus	101	0.000436687	Escherichia coli	92	0.000397774	Comamonas terrigena	85	0.000367509	Sphingomonas paucimobilis	73	0.000315625	Shigella dysenteriae	64	0.000276712
Monomicrobial	D151127	172270	57	Acinetobacter pittii	168882	0.980333	Acinetobacter tjernbergiae	908	0.0052708	Acinetobacter oleivorans	563	0.00326813	Acinetobacter halotolerans	322	0.00186916	Acinetobacter haemolyticus	289	0.0016776	Acinetobacter antiviralis	279	0.00161955	Acinetobacter septicus	123	0.000713995	Acinetobacter calcoaceticus	103	0.000597899	Acinetobacter seifertii	97	0.00056307	Acinetobacter apis	94	0.000545655	Acinetobacter baumannii	79	0.000458582	Acinetobacter lactucae	72	0.000417949
Polymicrobial	D304621	173408	190	Fusobacterium varium	8765	0.0505455	Shigella flexneri	2272	0.013102	Shigella sonnei	1233	0.0071104	Campylobacter gracilis	1010	0.00582441	Escherichia marmotae	989	0.00570331	Escherichia fergusonii	987	0.00569178	Megasphaera micronuciformis	627	0.00361575	Haemophilus parainfluenzae	397	0.0022894	Kosakonia sacchari	197	0.00113605	Lactobacillus crispatus	184	0.00106108	Citrobacter koseri	172	0.00099188	Escherichia coli	153	0.000882312
Monomicrobial	D151207	199939	141	Klebsiella pneumoniae	174414	0.872336	Klebsiella quasipneumoniae	18098	0.0905176	Enterobacter cloacae	1005	0.00502653	Klebsiella aerogenes	517	0.00258579	Pectobacterium aroidearum	283	0.00141543	Kosakonia sacchari	200	0.00100031	Kosakonia oryzae	121	0.000605185	Kosakonia radicincitans	92	0.00046014	Serratia marcescens	90	0.000450137	Tatumella terrea	66	0.000330101	Cedecea lapagei	48	0.000240073	Pectobacterium carotovorum	39	0.000195059
Monomicrobial	D151193	173169	82	Streptococcus dysgalactiae	170405	0.984039	Streptococcus agalactiae	328	0.0018941	Streptococcus parauberis	310	0.00179016	Streptococcus phocae	193	0.00111452	Streptococcus plurextorum	162	0.000935502	Streptococcus oralis	150	0.000866206	Streptococcus pyogenes	145	0.000837332	Streptococcus iniae	134	0.000773811	Streptococcus himalayensis	129	0.000744937	Streptococcus halichoeri	120	0.000692965	Streptococcus parasanguinis	114	0.000658316	Streptococcus canis	97	0.000560146
Monomicrobial	D151203	101486	172	Peptostreptococcus stomatis	28977	0.285527	Shigella sonnei	17247	0.169945	Parvimonas micra	8055	0.0793706	Gemella morbillorum	4980	0.0490708	Faecalibacterium prausnitzii	4732	0.0466271	Oscillibacter valericigenes	3067	0.0302209	Porphyromonas endodontalis	1777	0.0175098	[Eubacterium] nodatum	1111	0.0109473	Shigella flexneri	1052	0.010366	Campylobacter rectus	921	0.00907514	Fusobacterium nucleatum	813	0.00801096	Dialister invisus	632	0.00622746
Polymicrobial	D151204	100513	147	Peptostreptococcus stomatis	47259	0.470178	Parvimonas micra	13101	0.130341	Alloprevotella tannerae	7787	0.0774726	Faecalibacterium prausnitzii	6027	0.0599624	Oscillibacter valericigenes	4319	0.0429696	Porphyromonas endodontalis	1786	0.0177688	Fusobacterium nucleatum	1579	0.0157094	Campylobacter rectus	1216	0.0120979	Shigella sonnei	915	0.0091033	Gemella morbillorum	880	0.00875509	Dialister invisus	812	0.00807856	Prevotella shahii	640	0.00636734
Monomicrobial	21M2014854	185190	132	Escherichia fergusonii	395	0.00213294	Citrobacter koseri	323	0.00174415	Kosakonia sacchari	245	0.00132297	Shimwellia blattae	146	0.00078838	Escherichia coli	145	0.00078298	Mixta theicola	51	0.000275393	Citrobacter amalonaticus	46	0.000248394	Salmonella enterica	43	0.000232194	Erwinia psidii	40	0.000215994	Xenorhabdus stockiae	39	0.000210595	Cronobacter sakazakii	37	0.000199795	Erwinia amylovora	31	0.000167396
Polymicrobial	21M2014857	163773	102	Parvimonas micra	143490	0.876152	Porphyromonas endodontalis	2550	0.0155703	[Clostridium] symbiosum	1409	0.00860337	[Eubacterium] minutum	1033	0.00630751	Mogibacterium timidum	713	0.00435359	[Clostridium] citroniae	638	0.00389564	Ruthenibacterium lactatiformans	592	0.00361476	Campylobacter showae	553	0.00337662	Fusobacterium nucleatum	459	0.00280266	Faecalibacterium prausnitzii	443	0.00270496	Oscillibacter valericigenes	358	0.00218595	Bacteroides thetaiotaomicron	304	0.00185623
Monomicrobial	21M2014906	15738	121	Deinococcus geothermalis	8859	0.562905	Ralstonia mannitolilytica	1591	0.101093	Effusibacillus pohliae	961	0.0610624	Comamonas terrigena	208	0.0132164	Enterococcus gallinarum	182	0.0115644	Pelomonas saccharophila	163	0.0103571	Noviherbaspirillum soli	132	0.00838734	Bradyrhizobium embrapense	98	0.00622697	Sphingomonas changbaiensis	96	0.00609989	Rhodoferax ferrireducens	92	0.00584572	Bradyrhizobium rifense	73	0.00463845	Pseudoxanthomonas taiwanensis	72	0.00457491
Monomicrobial	21M2015020	65960	138	Staphylococcus aureus	44574	0.675773	Deinococcus geothermalis	12813	0.194254	Ralstonia mannitolilytica	2243	0.0340055	Effusibacillus pohliae	1904	0.028866	Sphingomonas paucimobilis	303	0.00459369	Flavisolibacter ginsenosidimutans	238	0.00360825	Staphylococcus caprae	231	0.00350212	Burkholderia stabilis	222	0.00336568	Staphylococcus petrasii	174	0.00263796	Pelomonas saccharophila	163	0.00247119	Sphingomonas echinoides	157	0.00238023	Staphylococcus hominis	127	0.00192541
Polymicrobial	21M2015021	216626	275	Klebsiella pneumoniae	172840	0.797873	Klebsiella quasipneumoniae	13633	0.0629334	Streptococcus salivarius	6858	0.0316582	Streptococcus agalactiae	6139	0.0283392	Deinococcus geothermalis	3910	0.0180495	Enterobacter cloacae	985	0.00454701	Effusibacillus pohliae	826	0.00381302	Ralstonia mannitolilytica	683	0.0031529	Streptococcus sanguinis	583	0.00269127	Veillonella parvula	546	0.00252047	Klebsiella aerogenes	536	0.00247431	Sphingomonas hankookensis	367	0.00169416
Monomicrobial	21M2015022	67670	166	Staphylococcus aureus	49567	0.732481	Deinococcus geothermalis	9466	0.139885	Effusibacillus pohliae	1643	0.0242796	Ralstonia mannitolilytica	1015	0.0149993	Sphingomonas melonis	450	0.00664992	Sphingomonas echinoides	411	0.00607359	Sphingomonas changbaiensis	317	0.0046845	Staphylococcus caprae	285	0.00421162	Pelomonas saccharophila	266	0.00393084	Sphingomonas hankookensis	250	0.0036944	Methylobacterium indicum	239	0.00353185	Staphylococcus petrasii	192	0.0028373
Monomicrobial	21M2015310	20848	85	Staphylococcus aureus	18593	0.891836	Deinococcus geothermalis	901	0.0432176	Effusibacillus pohliae	146	0.00700307	Ralstonia mannitolilytica	123	0.00589985	Staphylococcus caprae	72	0.00345357	Staphylococcus hominis	60	0.00287797	Staphylococcus petrasii	57	0.00273408	Staphylococcus simiae	51	0.00244628	Sphingomonas hankookensis	45	0.00215848	Aliterella antarctica	42	0.00201458	Staphylococcus piscifermentans	30	0.00143899	Staphylococcus haemolyticus	26	0.00124712
Monomicrobial	21M2015468	6838	43	Deinococcus geothermalis	4338	0.634396	Effusibacillus pohliae	1095	0.160135	Ralstonia mannitolilytica	265	0.038754	Comamonas terrigena	132	0.0193039	Alcaligenes faecalis	116	0.016964	Pelomonas saccharophila	76	0.0111144	Finegoldia magna	53	0.0077508	Moraxella osloensis	38	0.00555718	Atopostipes suicloacalis	31	0.00453349	Comamonas granuli	24	0.0035098	Pseudomonas chengduensis	19	0.00277859	Acinetobacter junii	18	0.00263235
Monomicrobial	21M2015506	21786	96	Deinococcus geothermalis	6794	0.311852	Effusibacillus pohliae	1922	0.0882218	Ralstonia mannitolilytica	1264	0.0580189	Shigella sonnei	1061	0.048701	Pelomonas saccharophila	219	0.0100523	Bradyrhizobium rifense	106	0.00486551	Sphingomonas echinoides	96	0.0044065	Sphingomonas melonis	81	0.00371798	Shigella flexneri	68	0.00312127	Pseudomonas brenneri	64	0.00293767	Phreatobacter oligotrophus	62	0.00284586	Caulobacter henricii	48	0.00220325
Polymicrobial	21M2011074	153132	266	Blautia luti	28950	0.189053	Faecalibacterium prausnitzii	14853	0.0969947	Anaerostipes hadrus	12844	0.0838753	Blautia wexlerae	9550	0.0623645	Anaerobutyricum hallii	9137	0.0596675	Ruminococcus bromii	5465	0.0356882	[Eubacterium] siraeum	3331	0.0217525	Ruminococcus champanellensis	2685	0.0175339	Phascolarctobacterium faecium	2342	0.015294	Oscillibacter valericigenes	2216	0.0144712	Blautia obeum	1815	0.0118525	Fusicatenibacter saccharivorans	1428	0.00932529
Monomicrobial	21M2011247	138894	61	Streptococcus dysgalactiae	136939	0.985925	Streptococcus parauberis	244	0.00175674	Streptococcus agalactiae	227	0.00163434	Streptococcus phocae	145	0.00104396	Streptococcus plurextorum	125	0.000899967	Streptococcus iniae	121	0.000871168	Streptococcus oralis	119	0.000856768	Streptococcus himalayensis	118	0.000849569	Streptococcus halichoeri	114	0.00082077	Streptococcus pyogenes	102	0.000734373	Streptococcus canis	89	0.000640776	Streptococcus parasanguinis	86	0.000619177
Polymicrobial	21M2011287	224962	344	Streptococcus parasanguinis	27865	0.123865	Streptococcus mitis	22819	0.101435	Neisseria perflava	21688	0.0964074	Streptococcus salivarius	17878	0.0794712	Gemella sanguinis	15692	0.069754	Granulicatella adiacens	13164	0.0585165	Streptococcus australis	9413	0.0418426	Granulicatella elegans	9109	0.0404913	Staphylococcus aureus	7289	0.032401	Gemella haemolysans	6614	0.0294005	Streptococcus infantis	3852	0.0171229	Streptococcus constellatus	3482	0.0154782
Monomicrobial	21M2012078	642	52	Staphylococcus capitis	117	0.182243	Sphingomonas hankookensis	111	0.172897	Streptococcus salivarius	70	0.109034	Gemella morbillorum	24	0.0373832	Comamonas terrigena	18	0.0280374	Sphingomonas frigidaeris	17	0.0264798	Thauera aminoaromatica	17	0.0264798	Sphingomonas paucimobilis	16	0.0249221	Methylobacterium goesingense	15	0.0233645	Sphingomonas panni	14	0.0218069	Aquabacterium commune	13	0.0202492	Roseomonas mucosa	10	0.0155763
Polymicrobial	21M2015966	44284	104	Streptococcus anginosus	15526	0.350601	Clostridium perfringens	6290	0.142038	Streptococcus intermedius	50	0.00112908	Escherichia coli	46	0.00103875	Citrobacter koseri	43	0.000971005	Escherichia fergusonii	43	0.000971005	Streptococcus gordonii	42	0.000948424	Klebsiella pneumoniae	32	0.000722609	Streptococcus troglodytidis	28	0.000632283	Kosakonia sacchari	27	0.000609701	Clostridium baratii	21	0.000474212	Clostridium tarantellae	21	0.000474212
Monomicrobial	21M2015974	7675	84	Staphylococcus caprae	3478	0.45316	Deinococcus geothermalis	1690	0.220195	Deinococcus caeni	439	0.0571987	Effusibacillus pohliae	383	0.0499023	Ralstonia mannitolilytica	254	0.0330945	Sphingomonas hankookensis	228	0.0297068	Moraxella osloensis	166	0.0216287	Pelomonas saccharophila	123	0.0160261	Staphylococcus capitis	96	0.0125081	Methylobacterium goesingense	90	0.0117264	Deinococcus seoulensis	81	0.0105537	Sphingomonas paucimobilis	81	0.0105537
Monomicrobial	21M2016160	22878	108	Streptococcus salivarius	13057	0.570723	Lactobacillus salivarius	2845	0.124355	Deinococcus geothermalis	2572	0.112422	Streptococcus parasanguinis	747	0.0326515	Streptococcus vestibularis	518	0.0226418	Ralstonia mannitolilytica	399	0.0174403	Streptococcus mitis	336	0.0146866	Streptococcus oralis	299	0.0130693	Effusibacillus pohliae	244	0.0106653	Sphingomonas hankookensis	132	0.00576974	Acidovorax temperans	101	0.00441472	Streptococcus cristatus	83	0.00362794
Monomicrobial	21M2016200	2744	46	Deinococcus geothermalis	873	0.318149	Effusibacillus pohliae	191	0.0696064	Listeria welshimeri	139	0.050656	Ralstonia mannitolilytica	109	0.039723	Aquabacterium citratiphilum	76	0.0276968	Comamonas terrigena	58	0.021137	Sphingomonas frigidaeris	53	0.0193149	Staphylococcus capitis	35	0.0127551	Streptococcus parasanguinis	24	0.00874636	Brevundimonas vesicularis	24	0.00874636	Methylorubrum extorquens	23	0.00838192	Vibrionimonas magnilacihabitans	20	0.00728863
Monomicrobial	21M2016228	107449	148	Deinococcus geothermalis	672	0.00625413	Comamonas terrigena	310	0.00288509	Escherichia fergusonii	230	0.00214055	Citrobacter koseri	188	0.00174967	Kosakonia sacchari	115	0.00107028	Escherichia coli	90	0.000837607	Shimwellia blattae	87	0.000809686	Ralstonia mannitolilytica	58	0.000539791	Effusibacillus pohliae	55	0.000511871	Acinetobacter seohaensis	32	0.000297816	Pantoea agglomerans	29	0.000269895	Erwinia amylovora	28	0.000260589
Monomicrobial	21M2016226	34124	79	Parvimonas micra	20760	0.608369	Peptostreptococcus stomatis	5237	0.15347	Fusobacterium varium	5011	0.146847	Bacteroides thetaiotaomicron	1051	0.0307994	Citrobacter freundii	430	0.0126011	Proteus vulgaris	376	0.0110186	Odoribacter splanchnicus	305	0.00893799	Sutterella wadsworthensis	197	0.00577306	Morganella morganii	81	0.0023737	Deinococcus geothermalis	60	0.00175829	Howardella ureilytica	46	0.00134802	Catabacter hongkongensis	42	0.00123081
Polymicrobial	21M2015392	1033258	95	Fusobacterium varium	635868	0.615401	Parvimonas micra	352933	0.341573	Peptostreptococcus stomatis	24551	0.0237608	Bacteroides thetaiotaomicron	6404	0.00619787	Odoribacter splanchnicus	4059	0.00392835	Sutterella wadsworthensis	1856	0.00179626	Fusobacterium mortiferum	1509	0.00146043	Fusobacterium nucleatum	1108	0.00107234	Fusobacterium periodonticum	799	0.000773282	Fusobacterium gastrosuis	745	0.00072102	Proteus vulgaris	712	0.000689082	Citrobacter freundii	428	0.000414224
Monomicrobial	21M2015710	6282	78	Deinococcus geothermalis	2525	0.401942	Staphylococcus epidermidis	1569	0.249761	Moraxella osloensis	680	0.108246	Effusibacillus pohliae	210	0.0334288	Methylobacterium goesingense	102	0.0162369	Ralstonia mannitolilytica	85	0.0135307	Staphylococcus hominis	83	0.0132124	Streptococcus sanguinis	75	0.0119389	Staphylococcus capitis	46	0.00732251	Roseomonas mucosa	42	0.00668577	Methylorubrum extorquens	41	0.00652658	Sphingomonas frigidaeris	37	0.00588984
Monomicrobial	21M2015829	8393	110	Deinococcus geothermalis	3351	0.399261	Ralstonia mannitolilytica	820	0.0977005	Effusibacillus pohliae	789	0.0940069	Staphylococcus hominis	652	0.0776838	Cutibacterium acnes	332	0.0395568	Pelomonas saccharophila	269	0.0320505	Staphylococcus epidermidis	136	0.016204	Deinococcus radiodurans	113	0.0134636	Sphingomonas hankookensis	112	0.0133445	[Propionibacterium] namnetense	85	0.0101275	Sphingomonas adhaesiva	80	0.00953175	Staphylococcus haemolyticus	78	0.00929346
Monomicrobial	21M2016958	91650	154	Staphylococcus epidermidis	47571	0.519051	Burkholderia multivorans	35280	0.384943	Stenotrophomonas maltophilia	5853	0.0638625	Stenotrophomonas pavanii	472	0.00515003	Staphylococcus petrasii	209	0.00228041	Staphylococcus muscae	107	0.00116748	Staphylococcus hominis	100	0.00109111	Staphylococcus capitis	90	0.000981997	Burkholderia latens	72	0.000785597	Staphylococcus piscifermentans	71	0.000774686	Burkholderia dolosa	63	0.000687398	Caballeronia turbans	56	0.00061102
Monomicrobial	21M2017379	57419	97	Streptococcus gordonii	55684	0.969784	Streptococcus intermedius	294	0.00512026	Streptococcus oralis	157	0.00273429	Streptococcus cristatus	99	0.00172417	Staphylococcus hominis	97	0.00168934	Streptococcus sanguinis	79	0.00137585	Sphingomonas echinoides	66	0.00114945	Streptococcus troglodytidis	54	0.000940455	Vibrionimonas magnilacihabitans	54	0.000940455	Pseudomonas plecoglossicida	51	0.000888208	Streptococcus constellatus	49	0.000853376	Streptococcus mutans	44	0.000766297
Monomicrobial	21M2016901	61036	49	[Eubacterium] brachy	24806	0.406416	Fusobacterium nucleatum	20270	0.332099	Parvimonas micra	7573	0.124074	Filifactor alocis	6988	0.11449	Streptococcus constellatus	794	0.0130087	Campylobacter rectus	205	0.00335867	Pelomonas saccharophila	57	0.000933875	Cutibacterium acnes	44	0.000720886	Staphylococcus epidermidis	43	0.000704502	Pseudomonas oryzihabitans	27	0.000442362	Streptococcus anginosus	23	0.000376827	Paracoccus marinus	23	0.000376827
Monomicrobial	21M2017368	5726	35	Shigella sonnei	83	0.0144953	Escherichia fergusonii	39	0.00681104	Escherichia marmotae	24	0.00419141	Shigella flexneri	13	0.00227035	Citrobacter koseri	7	0.00122249	Kosakonia sacchari	6	0.00104785	Escherichia coli	5	0.00087321	Xenorhabdus stockiae	3	0.000523926	Pectobacterium aroidearum	3	0.000523926	Serratia odorifera	3	0.000523926	Cedecea lapagei	2	0.000349284	Erwinia amylovora	2	0.000349284
Monomicrobial	21M2016293	907	23	Cutibacterium acnes	197	0.2172	Staphylococcus hominis	182	0.200662	Staphylococcus epidermidis	112	0.123484	Pelomonas saccharophila	68	0.0749724	Bacillus halodurans	56	0.061742	Finegoldia magna	55	0.0606395	Ralstonia insidiosa	53	0.0584344	Enterococcus cecorum	52	0.0573319	Atopostipes suicloacalis	45	0.0496141	Vibrionimonas magnilacihabitans	39	0.0429989	Bradyrhizobium yuanmingense	5	0.00551268	Methylobacterium indicum	5	0.00551268
Monomicrobial	21M2017207	154308	62	Streptococcus dysgalactiae	152009	0.985101	Streptococcus parauberis	353	0.00228763	Streptococcus agalactiae	271	0.00175623	Streptococcus phocae	176	0.00114058	Streptococcus iniae	155	0.00100448	Streptococcus plurextorum	151	0.000978562	Streptococcus pyogenes	137	0.000887835	Streptococcus himalayensis	127	0.000823029	Streptococcus oralis	119	0.000771185	Streptococcus halichoeri	106	0.000686938	Streptococcus parasanguinis	95	0.000615652	Streptococcus canis	86	0.000557327
Polymicrobial	21M2016075	64136	110	Parvimonas micra	48049	0.749174	Peptostreptococcus stomatis	4813	0.0750437	Fusobacterium nucleatum	1645	0.0256486	Porphyromonas endodontalis	1262	0.0196769	Oscillibacter valericigenes	1055	0.0164494	Gemella morbillorum	985	0.015358	Dialister pneumosintes	655	0.0102127	Streptococcus constellatus	335	0.00522328	Alloprevotella tannerae	291	0.00453723	Bacteroides thetaiotaomicron	135	0.0021049	Solobacterium moorei	86	0.0013409	Shigella sonnei	76	0.00118498
Monomicrobial	21M2016054	2032	44	Streptococcus gordonii	1547	0.761319	Comamonas terrigena	144	0.0708661	Acinetobacter seohaensis	54	0.0265748	Burkholderia stabilis	41	0.0201772	[Brevibacterium] frigoritolerans	35	0.0172244	Sphingomonas echinoides	32	0.015748	Staphylococcus epidermidis	30	0.0147638	Bacillus halodurans	21	0.0103346	Sphingomonas hankookensis	20	0.00984252	Pelomonas saccharophila	18	0.00885827	Sphingomonas aquatilis	10	0.00492126	Comamonas phosphati	9	0.00442913
Polymicrobial	21M2017025	32601	97	Parvimonas micra	10113	0.310205	Bacteroides fragilis	1831	0.0561639	Escherichia fergusonii	1570	0.048158	Faecalibacterium prausnitzii	1358	0.0416552	Streptococcus intermedius	1193	0.036594	Phascolarctobacterium faecium	1044	0.0320236	Klebsiella pneumoniae	1008	0.0309193	[Eubacterium] rectale	676	0.0207356	Bacteroides dorei	509	0.015613	Pseudomonas aeruginosa	478	0.0146621	[Clostridium] scindens	347	0.0106438	Peptostreptococcus stomatis	285	0.00874206
Monomicrobial	21M2017269	7667	92	Deinococcus radiodurans	3020	0.393896	Klebsiella pneumoniae	1456	0.189905	Methylobacterium goesingense	682	0.0889527	Moraxella osloensis	422	0.0550411	Deinococcus wulumuqiensis	295	0.0384766	Klebsiella quasipneumoniae	182	0.0237381	Massilia putida	144	0.0187818	Achromobacter kerstersii	134	0.0174775	Sphingomonas hankookensis	122	0.0159124	Paracoccus sanguinis	121	0.0157819	Staphylococcus hominis	117	0.0152602	Dermacoccus barathri	117	0.0152602
Monomicrobial	21M2017304	13725	54	Shigella sonnei	280	0.0204007	Vibrionimonas magnilacihabitans	134	0.00976321	Pelomonas saccharophila	73	0.00531876	Cutibacterium acnes	73	0.00531876	Staphylococcus epidermidis	63	0.00459016	Staphylococcus hominis	61	0.00444444	Moraxella osloensis	60	0.00437158	Escherichia fergusonii	56	0.00408015	Escherichia marmotae	43	0.00313297	Shigella flexneri	33	0.00240437	Kosakonia sacchari	20	0.00145719	Shimwellia blattae	19	0.00138434
Monomicrobial	21M2016756	9387	125	Pseudomonas oryzihabitans	2086	0.222222	Paracoccus speluncae	1942	0.206882	Pseudomonas parafulva	1227	0.130713	Acinetobacter radioresistens	649	0.0691382	Pseudomonas fulva	606	0.0645574	Paracoccus chinensis	522	0.0556088	Pseudomonas psychrotolerans	285	0.0303611	Acinetobacter indicus	248	0.0264195	Paracoccus sanguinis	225	0.0239693	Cutibacterium acnes	210	0.0223714	Staphylococcus capitis	188	0.0200277	Caulobacter henricii	153	0.0162991
Monomicrobial	21M2017321	133452	159	Shigella sonnei	2197	0.0164628	Escherichia fergusonii	740	0.00554506	Escherichia marmotae	725	0.00543266	Shigella flexneri	426	0.00319216	Kosakonia sacchari	181	0.00135629	Citrobacter koseri	108	0.00080928	Shimwellia blattae	94	0.000704373	Moraxella osloensis	83	0.000621946	Citrobacter amalonaticus	69	0.00051704	Escherichia coli	54	0.00040464	Erwinia amylovora	39	0.00029224	Xenorhabdus stockiae	37	0.000277253
Monomicrobial	21M2016813	2353	27	Delftia acidovorans	1536	0.652784	Staphylococcus aureus	536	0.227794	Filifactor alocis	90	0.038249	Chryseobacterium scophthalmum	59	0.0250744	Pelomonas saccharophila	37	0.0157246	Pararheinheimera aquatica	27	0.0114747	Polynucleobacter acidiphobus	13	0.00552486	Caulobacter henricii	4	0.00169996	Delftia lacustris	3	0.00127497	Polaromonas naphthalenivorans	3	0.00127497	Staphylococcus caprae	2	0.000849979	Staphylococcus equorum	2	0.000849979
Monomicrobial	21M2017887	138221	254	Pseudomonas aeruginosa	79821	0.577488	Ochrobactrum intermedium	34327	0.248349	Stenotrophomonas maltophilia	17263	0.124894	Acinetobacter seifertii	1207	0.00873239	Delftia tsuruhatensis	687	0.0049703	Delftia lacustris	627	0.00453621	Mycoplasma salivarium	358	0.00259006	Pseudomonas alcaligenes	229	0.00165677	Pseudomonas otitidis	152	0.00109969	Pseudomonas stutzeri	151	0.00109245	Achromobacter xylosoxidans	125	0.000904349	Pseudomonas resinovorans	120	0.000868175
Monomicrobial	21M2017976	2219	52	Staphylococcus aureus	1258	0.566922	Pelomonas saccharophila	228	0.102749	Cutibacterium acnes	189	0.0851735	Anaerococcus hydrogenalis	76	0.0342497	Alloiococcus otitis	44	0.0198288	Comamonas terrigena	34	0.0153222	Enterobacter hormaechei	33	0.0148716	Peptoniphilus harei	25	0.0112663	Staphylococcus auricularis	21	0.00946372	Pseudomonas formosensis	14	0.00630915	Acinetobacter seohaensis	13	0.00585849	Corynebacterium jeikeium	13	0.00585849
Monomicrobial	21M2017878	449	15	Stenotrophomonas maltophilia	144	0.320713	Cutibacterium acnes	104	0.231626	Stenotrophomonas pavanii	64	0.142539	Staphylococcus capitis	28	0.0623608	Streptococcus salivarius	26	0.0579065	Vibrionimonas magnilacihabitans	13	0.0289532	Staphylococcus caprae	9	0.0200445	Prevotella bivia	4	0.00890869	Alloiococcus otitis	3	0.00668151	Stenotrophomonas tumulicola	1	0.00222717	Escherichia fergusonii	1	0.00222717	Staphylococcus aureus	1	0.00222717
Monomicrobial	21M2017892	137476	62	Streptococcus dysgalactiae	135574	0.986165	Streptococcus parauberis	256	0.00186214	Streptococcus agalactiae	210	0.00152754	Streptococcus plurextorum	134	0.000974716	Streptococcus phocae	117	0.000851058	Streptococcus iniae	107	0.000778318	Streptococcus oralis	106	0.000771044	Streptococcus halichoeri	101	0.000734674	Streptococcus himalayensis	101	0.000734674	Streptococcus pyogenes	98	0.000712852	Massilia agri	77	0.000560098	Streptococcus canis	75	0.00054555
Monomicrobial	21M2017483	27273	128	Staphylococcus edaphicus	21398	0.784585	Cutibacterium acnes	899	0.032963	Staphylococcus saprophyticus	501	0.0183698	Streptococcus gordonii	447	0.0163898	Sphingomonas echinoides	248	0.00909324	Staphylococcus epidermidis	247	0.00905658	Moraxella osloensis	237	0.00868991	Staphylococcus cohnii	233	0.00854325	Serratia liquefaciens	168	0.00615994	Bradyrhizobium denitrificans	143	0.00524328	Sediminibacterium salmoneum	142	0.00520661	Staphylococcus arlettae	136	0.00498662
Monomicrobial	21M2017708	97789	86	Staphylococcus aureus	94398	0.965323	Staphylococcus caprae	537	0.00549142	Staphylococcus petrasii	279	0.00285308	Cutibacterium acnes	219	0.00223952	Staphylococcus hominis	198	0.00202477	Staphylococcus simiae	176	0.00179979	Staphylococcus haemolyticus	149	0.00152369	Staphylococcus xylosus	101	0.00103284	Staphylococcus piscifermentans	100	0.00102261	Staphylococcus epidermidis	94	0.000961253	Bacillus tropicus	85	0.000869218	Staphylococcus cohnii	77	0.00078741
Polymicrobial	21M2017242	79139	123	Shigella sonnei	13731	0.173505	Streptococcus constellatus	9796	0.123782	Klebsiella pneumoniae	1005	0.0126992	Shigella flexneri	752	0.00950227	Shigella boydii	415	0.00524394	Escherichia marmotae	368	0.00465005	Streptococcus anginosus	332	0.00419515	Escherichia fergusonii	212	0.00267883	Kosakonia sacchari	95	0.00120042	Citrobacter koseri	74	0.000935064	Shimwellia blattae	55	0.00069498	Citrobacter farmeri	48	0.000606528
Monomicrobial	21M2017484	8281	89	Enterococcus faecalis	5324	0.642918	Acinetobacter dispersus	1190	0.143702	Staphylococcus epidermidis	302	0.036469	Cutibacterium acnes	206	0.0248762	Moraxella osloensis	161	0.0194421	Buttiauxella izardii	158	0.0190798	Delftia acidovorans	128	0.0154571	Acinetobacter parvus	121	0.0146118	Amaricoccus kaplicensis	114	0.0137665	Pseudomonas oryzihabitans	78	0.00941915	Acinetobacter seohaensis	59	0.00712474	Amaricoccus macauensis	55	0.00664171
Monomicrobial	21M2017684	124518	66	Streptococcus agalactiae	122154	0.981015	Streptococcus suis	659	0.00529241	Streptococcus dysgalactiae	340	0.00273053	Streptococcus iniae	199	0.00159816	Streptococcus pseudoporcinus	133	0.00106812	Streptococcus phocae	122	0.000979778	Streptococcus plurextorum	122	0.000979778	Streptococcus oralis	107	0.000859314	Streptococcus gallinaceus	84	0.000674601	Streptococcus halichoeri	82	0.000658539	Streptococcus ictaluri	69	0.000554137	Streptococcus parasanguinis	47	0.000377455
Polymicrobial	21M2018126	3944	60	Aquitalea magnusonii	2065	0.52358	Aquitalea pelogenes	444	0.112576	Chromobacterium violaceum	270	0.0684584	Pelomonas saccharophila	184	0.0466531	Streptococcus anginosus	118	0.0299189	Serratia grimesii	56	0.0141988	Pantoea agglomerans	52	0.0131846	Pseudomonas azotoformans	42	0.0106491	Erwinia persicina	36	0.00912779	Pseudomonas fragi	35	0.00887424	Chromobacterium vaccinii	34	0.00862069	Streptococcus gordonii	31	0.00786004
Polymicrobial	21M2018340	55339	66	Parvimonas micra	27328	0.493829	Gemella morbillorum	6627	0.119753	Dialister invisus	4473	0.0808291	Fusobacterium nucleatum	3390	0.0612588	Solobacterium moorei	1453	0.0262563	Peptostreptococcus stomatis	1359	0.0245577	Bacteroides fragilis	1357	0.0245216	Streptococcus anginosus	1159	0.0209436	Pelomonas saccharophila	842	0.0152153	Escherichia fergusonii	740	0.0133721	Pyramidobacter piscolens	634	0.0114567	Bacteroides faecis	534	0.00964961
Polymicrobial	21M2018081	120065	184	Shigella dysenteriae	33100	0.275684	Shigella sonnei	5200	0.0433099	Morganella morganii	1289	0.0107359	Streptococcus parasanguinis	813	0.00677133	Klebsiella pneumoniae	744	0.00619664	Prevotella veroralis	653	0.00543872	Aquitalea magnusonii	408	0.00339816	Shigella flexneri	312	0.00259859	Shigella boydii	176	0.00146587	Escherichia fergusonii	170	0.0014159	Kosakonia sacchari	148	0.00123267	Pelomonas saccharophila	136	0.00113272
Monomicrobial	21M2018273	16339	84	Enterococcus faecalis	7377	0.451496	Aquitalea magnusonii	4382	0.268193	Aquitalea pelogenes	1169	0.0715466	Pelomonas saccharophila	962	0.0588775	Chromobacterium violaceum	626	0.0383132	Cutibacterium acnes	289	0.0176877	Staphylococcus capitis	285	0.0174429	Aerococcus viridans	175	0.0107106	Staphylococcus epidermidis	89	0.00544709	Chromobacterium vaccinii	53	0.00324377	Bradyrhizobium embrapense	39	0.00238693	Aquitalea denitrificans	22	0.00134647
Monomicrobial	21M2018358	93666	106	Staphylococcus epidermidis	86610	0.924669	Aquitalea magnusonii	1972	0.0210535	Pelomonas saccharophila	808	0.0086264	Aquitalea pelogenes	519	0.00554096	Staphylococcus capitis	372	0.00397156	Staphylococcus petrasii	346	0.00369398	Staphylococcus aureus	272	0.00290394	Chromobacterium violaceum	241	0.00257297	Staphylococcus muscae	161	0.00171887	Staphylococcus auricularis	149	0.00159076	Staphylococcus hominis	138	0.00147332	Staphylococcus piscifermentans	96	0.00102492
Monomicrobial	21M2018355	16734	107	Aquitalea magnusonii	6217	0.371519	Staphylococcus aureus	3037	0.181487	Aquitalea pelogenes	1614	0.0964503	Pseudomonas azotoformans	1336	0.0798375	Pelomonas saccharophila	1157	0.0691407	Chromobacterium violaceum	841	0.050257	Bradyrhizobium embrapense	376	0.0224692	Cutibacterium acnes	327	0.0195411	Sphingomonas echinoides	155	0.00926258	Caulobacter henricii	135	0.00806741	Chromobacterium vaccinii	71	0.00424286	Sphingomonas yabuuchiae	68	0.00406358
Polymicrobial	21M2018291	903	39	Pelomonas saccharophila	333	0.368771	Enterococcus faecalis	121	0.133998	Cutibacterium acnes	57	0.0631229	Phenylobacterium haematophilum	56	0.0620155	Aquitalea magnusonii	56	0.0620155	Sphingomonas echinoides	41	0.0454042	Staphylococcus epidermidis	39	0.0431894	Paracoccus chinensis	22	0.0243632	Mesorhizobium jarvisii	20	0.0221484	Delftia acidovorans	17	0.0188261	Aquitalea pelogenes	15	0.0166113	[Propionibacterium] namnetense	15	0.0166113
Monomicrobial	21M2018106	25718	212	Pseudomonas aeruginosa	12140	0.472043	Ochrobactrum intermedium	1663	0.0646629	Paracoccus sphaerophysae	1614	0.0627576	Brevundimonas vesicularis	1245	0.0484097	Aquitalea magnusonii	1238	0.0481375	Pelomonas saccharophila	819	0.0318454	Sphingomonas adhaesiva	615	0.0239132	Staphylococcus hominis	465	0.0180807	Paracoccus chinensis	397	0.0154367	Cutibacterium acnes	370	0.0143868	Aquitalea pelogenes	294	0.0114317	Pseudomonas azotoformans	287	0.0111595
Polymicrobial	21M2018094	88608	222	Klebsiella pneumoniae	76110	0.858952	Streptococcus anginosus	1030	0.0116242	Oscillibacter valericigenes	779	0.00879153	Phascolarctobacterium faecium	701	0.00791125	Victivallis vadensis	498	0.00562026	Bacteroides salyersiae	373	0.00420955	Enterobacter cloacae	348	0.00392741	[Eubacterium] infirmum	339	0.00382584	Bacteroides dorei	315	0.00355498	Bacteroides faecis	249	0.00281013	Bacteroides xylanisolvens	247	0.00278756	Alistipes onderdonkii	245	0.00276499
Monomicrobial	21M2018164	24447	142	Aquitalea magnusonii	6022	0.246329	Staphylococcus epidermidis	3362	0.137522	Staphylococcus devriesei	2401	0.0982125	Pelomonas saccharophila	1977	0.0808688	Aquitalea pelogenes	1669	0.0682701	Chromobacterium violaceum	1068	0.0436863	Staphylococcus auricularis	836	0.0341964	Lactobacillus delbrueckii	727	0.0297378	Staphylococcus cohnii	609	0.024911	Staphylococcus capitis	552	0.0225795	Cutibacterium acnes	460	0.0188162	Streptococcus sanguinis	191	0.00781282
Monomicrobial	21M2018699	14295	128	Staphylococcus epidermidis	5387	0.376845	Aquitalea magnusonii	2228	0.155859	Moraxella osloensis	1551	0.108499	Pelomonas saccharophila	1508	0.105491	Aquitalea pelogenes	667	0.0466597	Chromobacterium violaceum	365	0.0255334	Chryseobacterium hominis	212	0.0148304	Pseudomonas lurida	177	0.012382	Cutibacterium acnes	146	0.0102134	Pseudomonas azotoformans	123	0.00860441	Vibrionimonas magnilacihabitans	116	0.00811473	Sphingomonas echinoides	103	0.00720532
Monomicrobial	21M2018666	120339	208	Pseudomonas aeruginosa	111551	0.926973	Brevundimonas intermedia	1434	0.0119163	Aquitalea magnusonii	1063	0.00883338	Pelomonas saccharophila	454	0.00377268	Massilia putida	310	0.00257606	Pseudomonas alcaligenes	305	0.00253451	Aquitalea pelogenes	275	0.00228521	Pseudomonas stutzeri	253	0.00210239	Pseudomonas resinovorans	222	0.00184479	Pseudomonas lurida	220	0.00182817	Pseudomonas otitidis	215	0.00178662	Chromobacterium violaceum	191	0.00158718
Polymicrobial	21M2018967	42506	140	Aquitalea magnusonii	19095	0.449231	Aquitalea pelogenes	5516	0.12977	Pseudomonas aeruginosa	4308	0.10135	Chromobacterium violaceum	3427	0.0806239	Pseudomonas otitidis	2219	0.0522044	Moraxella osloensis	959	0.0225615	Brevundimonas intermedia	467	0.0109867	Klebsiella pneumoniae	366	0.00861055	Pelomonas saccharophila	359	0.00844587	Chromobacterium vaccinii	310	0.00729309	Pseudomonas azotoformans	172	0.00404649	Massilia putida	162	0.00381123
Monomicrobial	21M2018778	678	30	Pseudomonas aeruginosa	571	0.842183	Pelomonas saccharophila	28	0.0412979	Aquitalea magnusonii	15	0.0221239	Brevundimonas intermedia	12	0.0176991	Pseudomonas stutzeri	5	0.00737463	Massilia putida	4	0.00589971	Pseudomonas alcaligenes	3	0.00442478	Pseudomonas otitidis	2	0.00294985	Pseudomonas lurida	2	0.00294985	Phenylobacterium haematophilum	2	0.00294985	Chromobacterium violaceum	2	0.00294985	Rhodococcus qingshengii	2	0.00294985
Polymicrobial	21M2018826	98579	210	Faecalibacterium prausnitzii	4304	0.0436604	Shigella sonnei	904	0.00917031	Shigella flexneri	552	0.00559957	Escherichia fergusonii	435	0.0044127	Streptococcus intermedius	380	0.00385478	Ruminococcus bromii	261	0.00264762	Bacteroides dorei	259	0.00262733	Bacteroides vulgatus	141	0.00143032	Citrobacter koseri	121	0.00122744	Kosakonia sacchari	120	0.0012173	Klebsiella pneumoniae	112	0.00113614	Oscillibacter valericigenes	110	0.00111586
Monomicrobial	21M2018588	53686	36	Acinetobacter baumannii	52795	0.983403	Acinetobacter seifertii	206	0.00383713	Acinetobacter vivianii	140	0.00260776	Acinetobacter haemolyticus	81	0.00150877	Acinetobacter halotolerans	73	0.00135976	Acinetobacter septicus	51	0.000949968	Acinetobacter tandoii	35	0.000651939	Acinetobacter radioresistens	31	0.000577432	Acinetobacter rudis	24	0.000447044	Acinetobacter venetianus	22	0.00040979	Acinetobacter pragensis	21	0.000391163	Acinetobacter antiviralis	20	0.000372537
Polymicrobial	21M2018565	64269	199	Oscillibacter valericigenes	18590	0.289253	Comamonas terrigena	11849	0.184366	Phascolarctobacterium succinatutens	4683	0.0728656	Phascolarctobacterium faecium	3595	0.0559368	Alistipes onderdonkii	2164	0.033671	Bacteroides thetaiotaomicron	1787	0.027805	Parabacteroides gordonii	1490	0.0231838	Parabacteroides distasonis	1320	0.0205387	Intestinimonas butyriciproducens	1017	0.0158241	Cloacibacillus porcorum	924	0.0143771	Eisenbergiella tayi	888	0.0138169	Eisenbergiella massiliensis	811	0.0126188
Polymicrobial	21M2018371	65101	172	Parvimonas micra	35188	0.540514	Gemella morbillorum	4411	0.0677563	[Eubacterium] brachy	3273	0.0502757	Alloprevotella tannerae	2405	0.0369426	Mogibacterium timidum	2136	0.0328106	Phascolarctobacterium faecium	1779	0.0273268	Fusobacterium nucleatum	1372	0.0210749	Solobacterium moorei	1304	0.0200304	Streptococcus constellatus	1027	0.0157755	[Eubacterium] infirmum	719	0.0110444	Dialister pneumosintes	602	0.00924717	Phocaeicola abscessus	571	0.00877099
None	21M2019392	555	17	Pelomonas saccharophila	212	0.381982	Finegoldia magna	107	0.192793	Sphingomonas echinoides	38	0.0684685	Aquitalea magnusonii	33	0.0594595	Pseudomonas lurida	32	0.0576577	Brevundimonas intermedia	31	0.0558559	Enterococcus faecium	17	0.0306306	Staphylococcus hominis	16	0.0288288	Paracoccus marinus	16	0.0288288	Burkholderia contaminans	14	0.0252252	Aquitalea pelogenes	10	0.018018	Chromobacterium violaceum	5	0.00900901
None	21M2019256	2909	37	Pelomonas saccharophila	1743	0.599175	Moraxella osloensis	305	0.104847	Sphingomonas echinoides	146	0.0501891	Atopostipes suicloacalis	144	0.0495015	Vibrionimonas magnilacihabitans	129	0.0443451	Cutibacterium granulosum	67	0.023032	Bradyrhizobium rifense	43	0.0147817	Cutibacterium acnes	19	0.00653145	Micrococcus luteus	19	0.00653145	Acinetobacter baumannii	14	0.00481265	Bradyrhizobium embrapense	9	0.00309385	Microbacterium paraoxydans	5	0.0017188
Polymicrobial	21M2019039	35381	175	Fusobacterium varium	8893	0.25135	Frisingicoccus caecimuris	2036	0.057545	Oscillibacter valericigenes	1960	0.055397	Bacteroides vulgatus	1741	0.0492072	Faecalibacterium prausnitzii	908	0.0256635	Bacteroides uniformis	852	0.0240807	Ruthenibacterium lactatiformans	777	0.0219609	Bacteroides thetaiotaomicron	632	0.0178627	Bacteroides massiliensis	615	0.0173822	Alistipes putredinis	602	0.0170148	Bacteroides stercoris	567	0.0160256	Phascolarctobacterium faecium	558	0.0157712
Monomicrobial	21M2019447	34136	59	Staphylococcus aureus	32813	0.961243	Staphylococcus caprae	168	0.00492149	Staphylococcus petrasii	111	0.0032517	Staphylococcus hominis	102	0.00298805	Staphylococcus simiae	74	0.0021678	Staphylococcus haemolyticus	55	0.0016112	Staphylococcus xylosus	45	0.00131826	Staphylococcus cohnii	37	0.0010839	Staphylococcus piscifermentans	35	0.00102531	Staphylococcus devriesei	34	0.000996016	Staphylococcus epidermidis	30	0.000878838	Enterococcus faecium	30	0.000878838
Polymicrobial	21M2019157	10058	45	Gemella morbillorum	2990	0.297276	Parvimonas micra	1534	0.152515	Escherichia fergusonii	1397	0.138894	Fusobacterium nucleatum	462	0.0459336	Veillonella parvula	285	0.0283357	Prevotella oris	231	0.0229668	Ruthenibacterium lactatiformans	84	0.00835156	Pelomonas saccharophila	72	0.00715848	Brevundimonas nasdae	69	0.00686021	Dialister pneumosintes	63	0.00626367	Campylobacter rectus	48	0.00477232	Escherichia marmotae	47	0.0046729
Monomicrobial	21M2017996	1206	32	Bradyrhizobium embrapense	167	0.138474	Sphingomonas echinoides	135	0.11194	Deinococcus aetherius	99	0.0820896	Brevundimonas intermedia	79	0.0655058	Sediminibacterium salmoneum	76	0.0630182	Pelomonas saccharophila	76	0.0630182	Vibrionimonas magnilacihabitans	74	0.0613599	Brevundimonas vesicularis	61	0.0505804	Sphingomonas sanguinis	39	0.0323383	Cutibacterium acnes	34	0.0281924	Paracoccus chinensis	33	0.0273632	Staphylococcus auricularis	31	0.0257048
Polymicrobial	21M2019211	13242	135	Porphyromonas endodontalis	6871	0.518879	Culturomica massiliensis	895	0.067588	Faecalibacterium prausnitzii	593	0.0447818	Enterococcus raffinosus	464	0.03504	Oscillibacter valericigenes	369	0.0278659	Enterococcus gilvus	301	0.0227307	Christensenella minuta	220	0.0166138	Bacteroides thetaiotaomicron	211	0.0159341	Alistipes shahii	199	0.0150279	Ruthenibacterium lactatiformans	153	0.0115541	[Clostridium] lavalense	145	0.01095	[Clostridium] citroniae	136	0.0102704
Polymicrobial	21M2019405	101624	150	Streptococcus dysgalactiae	58990	0.580473	Morganella morganii	28931	0.284687	Proteus mirabilis	8849	0.0870759	Providencia burhodogranariea	516	0.00507754	Streptococcus parauberis	180	0.00177124	Streptococcus agalactiae	129	0.00126939	Morganella psychrotolerans	106	0.00104306	Streptococcus phocae	77	0.000757695	Providencia rettgeri	69	0.000678973	Streptococcus iniae	67	0.000659293	Streptococcus plurextorum	67	0.000659293	Streptococcus pyogenes	59	0.000580572
Polymicrobial	21M2019210	40554	77	Parvimonas micra	15684	0.386744	Porphyromonas endodontalis	6805	0.167801	Prevotella oris	6302	0.155398	Peptostreptococcus stomatis	5299	0.130665	Atopobium rimae	1018	0.0251023	[Clostridium] clostridioforme	1003	0.0247325	Dialister pneumosintes	641	0.0158061	Mogibacterium timidum	370	0.00912364	[Eubacterium] infirmum	288	0.00710164	[Clostridium] citroniae	242	0.00596735	Prevotella nigrescens	235	0.00579474	Dialister invisus	213	0.00525226
None	21M2019552	1700	35	Acinetobacter johnsonii	784	0.461176	Sphingobacterium nematocida	184	0.108235	Fusobacterium periodonticum	120	0.0705882	Stenotrophomonas terrae	110	0.0647059	Sphingomonas echinoides	89	0.0523529	Sphingomonas adhaesiva	86	0.0505882	Lactobacillus delbrueckii	49	0.0288235	Cutibacterium acnes	37	0.0217647	Pelomonas saccharophila	31	0.0182353	Moraxella osloensis	30	0.0176471	Pseudomonas balearica	26	0.0152941	Chryseobacterium hominis	8	0.00470588
None	21M2019523	186	11	Vibrionimonas magnilacihabitans	59	0.317204	Pelomonas saccharophila	36	0.193548	Caulobacter henricii	25	0.134409	Sediminibacterium salmoneum	11	0.0591398	Sphingomonas echinoides	9	0.0483871	Streptococcus mitis	5	0.0268817	Caulobacter segnis	2	0.0107527	Asinibacterium lactis	1	0.00537634	Haemophilus parainfluenzae	1	0.00537634	Haemophilus sputorum	1	0.00537634	Shigella flexneri	1	0.00537634			0
Monomicrobial	21M2019662	103373	104	Enterococcus faecalis	98069	0.948691	Porphyromonas endodontalis	511	0.00494326	Peptostreptococcus stomatis	353	0.00341482	Dialister invisus	351	0.00339547	Atopobium rimae	346	0.0033471	Comamonas terrigena	320	0.00309559	Pelomonas saccharophila	287	0.00277635	Enterococcus rivorum	270	0.0026119	Enterococcus faecium	165	0.00159616	Parvimonas micra	134	0.00129628	Prevotella oris	126	0.00121889	Cutibacterium acnes	122	0.00118019
Monomicrobial	21M2019620	7647	92	Prevotella oris	1498	0.195894	Staphylococcus epidermidis	816	0.106709	Moraxella osloensis	731	0.095593	Bacillus cereus	684	0.0894468	Parvimonas micra	631	0.082516	Leuconostoc citreum	557	0.072839	Sphingomonas echinoides	423	0.0553158	Porphyromonas endodontalis	361	0.0472081	Solobacterium moorei	338	0.0442003	Atopobium rimae	219	0.0286387	Peptostreptococcus stomatis	135	0.017654	Labilithrix luteola	99	0.0129463
Polymicrobial	21M2019516	230835	43	Finegoldia magna	73292	0.317508	Prevotella bivia	42576	0.184443	Peptoniphilus coxii	36912	0.159906	Anaerococcus obesiensis	34124	0.147829	Dialister propionicifaciens	15770	0.0683172	Peptoniphilus harei	13558	0.0587346	Peptoniphilus lacrimalis	3915	0.0169602	Dialister invisus	2505	0.0108519	Dialister micraerophilus	2231	0.00966491	Peptoniphilus grossensis	1062	0.00460069	Anaerococcus murdochii	820	0.00355232	Porphyromonas uenonis	736	0.00318842
Monomicrobial	21M2019579	28869	90	Burkholderia pseudomallei	26052	0.902421	Burkholderia mallei	1364	0.0472479	Pelomonas saccharophila	164	0.00568083	Comamonas terrigena	156	0.00540372	Delftia acidovorans	95	0.00329073	Brevundimonas intermedia	77	0.00266722	Sphingomonas echinoides	42	0.00145485	Burkholderia thailandensis	32	0.00110846	Burkholderia humptydooensis	31	0.00107382	Burkholderia lata	30	0.00103918	Paraburkholderia rhizoxinica	27	0.000935259	Burkholderia oklahomensis	26	0.00090062
Monomicrobial	21M2019495	1597	36	Bacillus cereus	1341	0.839699	Brevundimonas intermedia	33	0.0206637	Bacillus halodurans	21	0.0131497	Aquitalea magnusonii	19	0.0118973	Moraxella osloensis	15	0.00939261	Massilia timonae	14	0.00876644	Bacillus proteolyticus	13	0.00814026	Staphylococcus epidermidis	9	0.00563557	Enterococcus faecium	8	0.00500939	Adhaeribacter swui	8	0.00500939	Staphylococcus hominis	7	0.00438322	Aquitalea pelogenes	5	0.00313087
None	21M2019465	321	11	Cutibacterium acnes	157	0.489097	Staphylococcus hominis	59	0.183801	Paracoccus chinensis	58	0.180685	Pelomonas saccharophila	27	0.0841121	Sphingomonas echinoides	7	0.0218069	Vibrionimonas magnilacihabitans	5	0.0155763	Paracoccus aestuariivivens	1	0.00311526	Paracoccus sanguinis	1	0.00311526	Sphingomonas mali	1	0.00311526	Pseudomonas guguanensis	1	0.00311526	Propionibacterium freudenreichii	1	0.00311526			0
None	21M2019576	13166	78	Moraxella osloensis	1957	0.14864	Pelomonas saccharophila	552	0.0419262	Shigella sonnei	235	0.017849	Kocuria rhizophila	179	0.0135956	Streptococcus thermophilus	150	0.011393	Cutibacterium acnes	139	0.0105575	Roseomonas mucosa	135	0.0102537	Pseudomonas lurida	132	0.0100258	Dermacoccus nishinomiyaensis	119	0.00903843	Acinetobacter johnsonii	90	0.00683579	Sediminibacterium salmoneum	63	0.00478505	Shigella flexneri	51	0.00387361
Monomicrobial	21M2019840	46339	113	Klebsiella pneumoniae	29114	0.628283	Haemophilus influenzae	6610	0.142644	Parvimonas micra	4142	0.0893848	Veillonella parvula	2630	0.0567556	Fusobacterium nucleatum	929	0.0200479	Peptostreptococcus stomatis	531	0.011459	Bacteroides heparinolyticus	463	0.00999158	Campylobacter concisus	149	0.00321543	Enterobacter cloacae	105	0.00226591	Pelomonas saccharophila	99	0.00213643	Cutibacterium acnes	82	0.00176957	Klebsiella aerogenes	72	0.00155377
Monomicrobial	21M2020008	143705	125	Staphylococcus aureus	137026	0.953523	Staphylococcus caprae	668	0.00464841	Burkholderia contaminans	399	0.00277652	Staphylococcus petrasii	391	0.00272085	Methylobacterium goesingense	387	0.00269302	Vibrionimonas magnilacihabitans	284	0.00197627	Sphingomonas echinoides	273	0.00189973	Staphylococcus hominis	271	0.00188581	Streptococcus oralis	260	0.00180926	Staphylococcus simiae	250	0.00173968	Acinetobacter schindleri	195	0.00135695	Staphylococcus haemolyticus	190	0.00132215
Monomicrobial	21M2019761	36034	64	Enterococcus faecalis	34676	0.962313	Vibrionimonas magnilacihabitans	195	0.00541156	Acinetobacter johnsonii	133	0.00369096	Pelomonas saccharophila	113	0.00313593	Enterococcus rivorum	90	0.00249764	Brevundimonas intermedia	54	0.00149858	Enterococcus faecium	41	0.00113781	Enterococcus avium	36	0.000999056	Cutibacterium acnes	36	0.000999056	Labilithrix luteola	36	0.000999056	Enterococcus asini	28	0.000777044	Carnobacterium funditum	28	0.000777044
Monomicrobial	21M2020019	12351	87	Enterococcus faecalis	9077	0.73492	Pelomonas saccharophila	465	0.0376488	Klebsiella oxytoca	354	0.0286616	Sphingomonas echinoides	251	0.0203222	Klebsiella grimontii	214	0.0173265	Peptoniphilus harei	198	0.0160311	Vibrionimonas magnilacihabitans	191	0.0154643	Sediminibacterium salmoneum	157	0.0127115	Cutibacterium acnes	118	0.00955388	Erythrobacter gaetbuli	80	0.00647721	Bradyrhizobium rifense	39	0.00315764	Moraxella osloensis	28	0.00226702
Monomicrobial	21M2020108	2543	46	Enterobacter hormaechei	529	0.208022	Bacillus halodurans	444	0.174597	Streptococcus mitis	425	0.167125	Enterococcus faecium	250	0.0983091	Brevundimonas lenta	180	0.0707825	Acinetobacter johnsonii	83	0.0326386	Enterobacter mori	38	0.014943	Enterobacter cancerogenus	15	0.00589855	Sorangium cellulosum	12	0.00471884	Cutibacterium acnes	11	0.0043256	Pelomonas saccharophila	8	0.00314589	Sphingomonas echinoides	5	0.00196618
Monomicrobial	21M2020167	33906	126	Stenotrophomonas pavanii	22596	0.666431	Pseudomonas aeruginosa	7258	0.214062	Enterococcus faecium	423	0.0124757	Pelomonas saccharophila	337	0.00993924	Haemophilus parainfluenzae	304	0.00896596	Bradyrhizobium embrapense	169	0.00498437	Methylobacterium goesingense	157	0.00463045	Burkholderia stabilis	150	0.004424	Enterobacter mori	82	0.00241845	Acinetobacter junii	73	0.00215301	Stenotrophomonas maltophilia	52	0.00153365	Brevundimonas intermedia	47	0.00138619
Monomicrobial	21M2020672	34095	60	Stenotrophomonas maltophilia	28525	0.836633	Stenotrophomonas pavanii	4736	0.138906	Stenotrophomonas tumulicola	107	0.00313829	Paracoccus yeei	51	0.00149582	Xanthomonas campestris	43	0.00126118	Stenotrophomonas humi	38	0.00111453	Pseudoxanthomonas jiangsuensis	31	0.000909224	Stenotrophomonas rhizophila	24	0.000703916	Lysobacter solanacearum	15	0.000439947	Stenotrophomonas ginsengisoli	12	0.000351958	Xylella fastidiosa	12	0.000351958	Stenotrophomonas chelatiphaga	11	0.000322628
Polymicrobial	21M2020881	108490	254	Streptococcus intermedius	41650	0.383906	Shigella sonnei	4163	0.0383722	Porphyromonas endodontalis	3402	0.0313577	Campylobacter showae	3115	0.0287123	Oscillibacter valericigenes	2740	0.0252558	Streptococcus constellatus	1780	0.016407	Aggregatibacter segnis	451	0.00415707	Eikenella corrodens	423	0.00389898	Proteus mirabilis	327	0.0030141	Shigella flexneri	294	0.00270993	Ruthenibacterium lactatiformans	250	0.00230436	Eisenbergiella massiliensis	244	0.00224906
Polymicrobial	21M2020959	271670	210	Klebsiella pneumoniae	129422	0.476394	Streptococcus vestibularis	125151	0.460673	Streptococcus salivarius	7698	0.0283358	Klebsiella quasipneumoniae	2262	0.00832628	Enterobacter cloacae	505	0.00185887	Streptococcus saliviloxodontae	474	0.00174476	Klebsiella aerogenes	381	0.00140244	Streptococcus australis	353	0.00129937	Enterococcus faecium	315	0.00115949	Kosakonia oryzae	150	0.00055214	Pectobacterium aroidearum	150	0.00055214	Veillonella dispar	132	0.000485884
Monomicrobial	21M2020722	252188	152	Shigella sonnei	24390	0.0967136	Shigella flexneri	1315	0.00521436	Escherichia marmotae	853	0.0033824	Shigella boydii	793	0.00314448	Escherichia fergusonii	643	0.00254969	Citrobacter koseri	239	0.000947706	Kosakonia sacchari	218	0.000864434	Shimwellia blattae	181	0.000717719	Escherichia coli	125	0.000495662	Citrobacter amalonaticus	96	0.000380668	Xenorhabdus stockiae	61	0.000241883	Pectobacterium aroidearum	46	0.000182404
Monomicrobial	21M2021033	264397	125	Pseudomonas aeruginosa	258662	0.978309	Pseudomonas alcaligenes	588	0.00222393	Pseudomonas stutzeri	467	0.00176628	Pseudomonas otitidis	380	0.00143723	Pseudomonas resinovorans	374	0.00141454	Pseudomonas citronellolis	319	0.00120652	Pseudomonas oryzihabitans	204	0.000771567	Pseudomonas nitroreducens	198	0.000748874	Pseudomonas glareae	162	0.000612715	Pseudomonas oleovorans	157	0.000593804	Pseudomonas guguanensis	83	0.000313922	Pseudomonas linyingensis	75	0.000283664
Monomicrobial	21M2021008	10121	101	Acinetobacter johnsonii	3673	0.362909	Lactobacillus crispatus	688	0.0679775	Streptococcus parasanguinis	575	0.0568126	Pelomonas saccharophila	503	0.0496986	Paracoccus sanguinis	428	0.0422883	Pseudomonas koreensis	391	0.0386325	Tumebacillus ginsengisoli	370	0.0365577	Moraxella osloensis	308	0.0304318	Bradyrhizobium embrapense	272	0.0268748	Cutibacterium acnes	263	0.0259856	Comamonas jiangduensis	257	0.0253927	Pseudomonas guguanensis	223	0.0220334
Monomicrobial	21M2020506	105236	78	Streptococcus agalactiae	102794	0.976795	Streptococcus suis	513	0.00487476	Streptococcus dysgalactiae	280	0.00266069	Streptococcus iniae	146	0.00138736	Staphylococcus hominis	138	0.00131134	Pelomonas saccharophila	129	0.00122582	Streptococcus pseudoporcinus	106	0.00100726	Streptococcus phocae	91	0.000864723	Streptococcus plurextorum	90	0.000855221	Streptococcus oralis	78	0.000741191	Streptococcus ictaluri	72	0.000684177	Streptococcus halichoeri	59	0.000560645
Monomicrobial	21M2020378	2922	43	Streptococcus thermophilus	1646	0.563313	Pseudomonas plecoglossicida	331	0.113279	Enterococcus faecium	120	0.0410678	Brevundimonas intermedia	116	0.0396988	Pseudomonas taiwanensis	65	0.022245	Cutibacterium acnes	19	0.0065024	Pseudomonas parafulva	17	0.00581793	Pseudomonas monteilii	15	0.00513347	Brevundimonas vesicularis	10	0.00342231	Chiayiivirga flava	7	0.00239562	Streptococcus saliviloxodontae	6	0.00205339	Pseudomonas guguanensis	5	0.00171116
Monomicrobial	21M2020403	2865	43	Pelomonas saccharophila	833	0.29075	Moraxella osloensis	716	0.249913	Staphylococcus epidermidis	304	0.106108	Pseudomonas aeruginosa	272	0.0949389	Streptococcus australis	238	0.0830716	Cutibacterium acnes	135	0.0471204	Dermacoccus nishinomiyaensis	107	0.0373473	Aquitalea magnusonii	77	0.0268761	Staphylococcus capitis	26	0.00907504	Aquitalea pelogenes	23	0.00802792	Dermacoccus barathri	14	0.00488656	[Propionibacterium] namnetense	11	0.00383944
Polymicrobial	21M2020302	209583	270	Parvimonas micra	55077	0.262793	Peptostreptococcus stomatis	25869	0.123431	Gemella morbillorum	18920	0.0902745	Comamonas terrigena	15627	0.0745623	Faecalibacterium prausnitzii	10303	0.0491595	Fusobacterium nucleatum	10107	0.0482243	Porphyromonas endodontalis	5905	0.028175	Prevotella intermedia	5866	0.0279889	[Eubacterium] nodatum	4426	0.0211181	Solobacterium moorei	4180	0.0199444	Oscillibacter valericigenes	3814	0.018198	Mogibacterium timidum	2298	0.0109646
Monomicrobial	21M2021728	186009	111	Enterococcus faecalis	126676	0.681021	Enterococcus faecium	52259	0.280949	Acinetobacter seohaensis	808	0.00434388	Enterococcus avium	541	0.00290846	Comamonas terrigena	418	0.0022472	Pelomonas saccharophila	346	0.00186013	Enterococcus rivorum	307	0.00165046	Staphylococcus capitis	292	0.00156982	Enterococcus asini	262	0.00140853	Enterococcus hirae	202	0.00108597	Enterococcus canis	194	0.00104296	Enterococcus wangshanyuanii	176	0.000946191
Monomicrobial	21M2022073	475438	146	Enterococcus faecalis	455518	0.958102	Enterococcus faecium	5879	0.0123654	Comamonas terrigena	2090	0.00439595	Enterococcus rivorum	1132	0.00238096	Enterococcus asini	523	0.00110004	Enterococcus avium	496	0.00104325	Enterococcus moraviensis	476	0.00100118	Enterococcus saccharolyticus	433	0.000910739	Enterococcus wangshanyuanii	377	0.000792953	Pelomonas saccharophila	301	0.0006331	Enterococcus phoeniculicola	290	0.000609964	Enterococcus casseliflavus	287	0.000603654
Monomicrobial	21M2022253	40392	107	Enterococcus faecium	34270	0.848435	Comamonas terrigena	2350	0.0581798	Pelomonas saccharophila	318	0.00787285	Bradyrhizobium embrapense	279	0.00690731	Enterococcus avium	274	0.00678352	Paracoccus chinensis	207	0.00512478	Brevundimonas intermedia	148	0.00366409	Enterococcus canis	111	0.00274807	Enterococcus asini	99	0.00245098	Comamonas phosphati	98	0.00242622	Enterococcus hirae	97	0.00240147	Enterococcus ratti	84	0.00207962
Monomicrobial	21M2021772	40246	138	Enterococcus faecium	26469	0.65768	Pseudomonas aeruginosa	9165	0.227724	Comamonas terrigena	1192	0.0296179	Acinetobacter seohaensis	673	0.0167222	Pseudoxanthomonas taiwanensis	367	0.00911892	Pelomonas saccharophila	310	0.00770263	Enterococcus avium	212	0.0052676	Paracoccus chinensis	183	0.00454704	Enterococcus canis	83	0.00206232	Enterococcus asini	78	0.00193808	Enterococcus hirae	78	0.00193808	Bradyrhizobium embrapense	66	0.00163991
Polymicrobial	21M2021206	41824	149	Helicobacter pylori	29974	0.71667	Streptococcus parasanguinis	3458	0.0826798	Streptococcus salivarius	1831	0.0437787	Streptococcus mitis	1182	0.0282613	Streptococcus pseudopneumoniae	657	0.0157087	Streptococcus oralis	611	0.0146088	Veillonella atypica	473	0.0113093	Gemella haemolysans	403	0.00963562	Veillonella dispar	235	0.00561878	Granulicatella elegans	153	0.00365819	Streptococcus vestibularis	142	0.00339518	Enterococcus faecium	132	0.00315608
Polymicrobial	21M2021721	263838	193	Parvimonas micra	65621	0.248717	Peptostreptococcus stomatis	50237	0.190409	Porphyromonas gingivalis	45854	0.173796	Gemella morbillorum	35330	0.133908	Fusobacterium nucleatum	23425	0.0887855	Oscillibacter valericigenes	11237	0.0425905	[Eubacterium] nodatum	4645	0.0176055	Eikenella corrodens	707	0.00267967	Solobacterium moorei	634	0.00240299	Peptostreptococcus anaerobius	524	0.00198607	Fretibacterium fastidiosum	433	0.00164116	Catonella morbi	430	0.00162979
Monomicrobial	21M2021332	98183	92	Enterococcus faecalis	64363	0.655541	Enterococcus faecium	30651	0.312182	Enterococcus avium	325	0.00331015	Staphylococcus warneri	246	0.00250553	Enterococcus rivorum	164	0.00167035	Enterococcus asini	162	0.00164998	Enterococcus canis	121	0.00123239	Enterococcus hirae	109	0.00111017	Enterococcus saccharolyticus	92	0.000937026	Enterococcus ratti	86	0.000875915	Enterococcus wangshanyuanii	84	0.000855545	Enterococcus moraviensis	76	0.000774065
Monomicrobial	22M2100221	186328	84	Enterococcus faecalis	182279	0.97827	Enterococcus rivorum	462	0.0024795	Enterococcus faecium	318	0.00170667	Enterococcus asini	203	0.00108948	Enterococcus saccharolyticus	191	0.00102507	Enterococcus moraviensis	179	0.000960672	Enterococcus avium	173	0.00092847	Enterococcus wangshanyuanii	141	0.00075673	Enterococcus casseliflavus	130	0.000697694	Carnobacterium funditum	128	0.000686961	Enterococcus gallinarum	100	0.000536688	Vagococcus penaei	88	0.000472285
Polymicrobial	22M2100172	213752	256	Campylobacter showae	50441	0.235979	Pseudoramibacter alactolyticus	9980	0.0466896	Peptostreptococcus stomatis	9861	0.0461329	Parvimonas micra	9073	0.0424464	Gemella morbillorum	8796	0.0411505	Pyramidobacter piscolens	8053	0.0376745	Porphyromonas gingivalis	6764	0.0316441	Aggregatibacter segnis	5661	0.026484	Streptococcus constellatus	4159	0.0194571	Oscillibacter valericigenes	3186	0.0149051	Streptococcus anginosus	2012	0.00941278	Phocaeicola abscessus	1472	0.00688649
Monomicrobial	22M2100189	10065	87	Cutibacterium acnes	4510	0.448087	Staphylococcus epidermidis	1348	0.133929	Staphylococcus capitis	1104	0.109687	Corynebacterium tuscaniense	444	0.0441133	Bradyrhizobium embrapense	444	0.0441133	Corynebacterium pilbarense	330	0.0327869	Corynebacterium ureicelerivorans	294	0.0292101	Finegoldia magna	283	0.0281172	Staphylococcus lugdunensis	240	0.023845	Staphylococcus caprae	197	0.0195728	Aliterella antarctica	112	0.0111277	Corynebacterium tuberculostearicum	106	0.0105315
Monomicrobial	22M2100166	352	7	Acinetobacter septicus	240	0.681818	Variovorax boronicumulans	94	0.267045	Pseudomonas azotoformans	5	0.0142045	Acinetobacter albensis	1	0.00284091	Ramlibacter monticola	1	0.00284091	Corynebacterium tuberculostearicum	1	0.00284091	Cutibacterium acnes	1	0.00284091			0			0			0			0			0
Monomicrobial	22M2000452	8060	51	Campylobacter jejuni	5923	0.734864	Comamonas terrigena	708	0.0878412	Comamonas granuli	225	0.0279156	Pseudoxanthomonas taiwanensis	166	0.0205955	Pseudomonas oleovorans	108	0.0133995	Bradyrhizobium embrapense	57	0.00707196	Acinetobacter baumannii	40	0.00496278	Comamonas jiangduensis	34	0.00421836	Campylobacter coli	27	0.00334988	Campylobacter subantarcticus	26	0.00322581	Comamonas denitrificans	24	0.00297767	Staphylococcus epidermidis	24	0.00297767
Polymicrobial	22M2100180	109877	128	Peptostreptococcus stomatis	53167	0.483877	Gemella morbillorum	26693	0.242935	Pyramidobacter piscolens	4379	0.0398537	Filifactor alocis	3553	0.0323362	Streptococcus intermedius	3375	0.0307162	Odoribacter splanchnicus	2996	0.0272669	Phascolarctobacterium faecium	2367	0.0215423	Porphyromonas gingivalis	1972	0.0179473	Fusobacterium nucleatum	629	0.00572458	Peptostreptococcus anaerobius	450	0.00409549	Pseudoramibacter alactolyticus	377	0.00343111	Streptococcus constellatus	302	0.00274853
Monomicrobial	22M2100137	190730	145	Shigella sonnei	21734	0.113952	Shigella flexneri	1069	0.00560478	Shigella boydii	865	0.00453521	Escherichia fergusonii	587	0.00307765	Citrobacter koseri	269	0.00141037	Kosakonia sacchari	265	0.0013894	Shimwellia blattae	140	0.000734022	Pelomonas saccharophila	69	0.000361768	Escherichia marmotae	59	0.000309338	Escherichia coli	55	0.000288366	Erwinia amylovora	53	0.00027788	Mixta theicola	53	0.00027788
Monomicrobial	22M2100085	142309	69	Staphylococcus aureus	137121	0.963544	Staphylococcus caprae	864	0.0060713	Staphylococcus petrasii	472	0.00331673	Staphylococcus hominis	340	0.00238917	Staphylococcus capitis	336	0.00236106	Staphylococcus simiae	312	0.00219241	Staphylococcus haemolyticus	249	0.00174971	Staphylococcus xylosus	183	0.00128593	Bacillus tropicus	148	0.00103999	Staphylococcus piscifermentans	133	0.000934586	Staphylococcus epidermidis	122	0.000857289	Macrococcus caseolyticus	108	0.000758912
Monomicrobial	22M2100052	224609	81	Streptococcus sanguinis	219232	0.976061	Streptococcus oralis	898	0.00399806	Streptococcus australis	446	0.00198567	Streptococcus constellatus	422	0.00187882	Streptococcus panodentis	414	0.0018432	Streptococcus marmotae	313	0.00139353	Streptococcus gordonii	234	0.00104181	Streptococcus himalayensis	222	0.000988384	Streptococcus pneumoniae	207	0.000921602	Streptococcus cristatus	163	0.000725706	Streptococcus troglodytidis	153	0.000681184	Streptococcus infantis	137	0.000609949
Polymicrobial	22M2000213	253292	248	Staphylococcus aureus	219529	0.866703	Corynebacterium amycolatum	4350	0.0171739	Enterococcus faecalis	3747	0.0147932	Brevibacterium ravenspurgense	3173	0.012527	Staphylococcus caprae	1269	0.00501003	Staphylococcus haemolyticus	1222	0.00482447	Staphylococcus petrasii	840	0.00331633	Pseudoglutamicibacter cumminsii	642	0.00253462	Staphylococcus capitis	516	0.00203717	Staphylococcus hominis	487	0.00192268	Staphylococcus simiae	475	0.00187531	Staphylococcus xylosus	331	0.00130679
Polymicrobial	22M2100020	41054	110	Pseudomonas aeruginosa	33629	0.819141	Moraxella osloensis	4292	0.104545	Staphylococcus epidermidis	289	0.00703951	Cutibacterium acnes	247	0.00601647	Agrobacterium tumefaciens	245	0.00596775	Cloacibacterium normanense	158	0.00384859	Paracoccus marinus	111	0.00270376	Pseudomonas alcaligenes	106	0.00258197	Paracoccus sanguinis	102	0.00248453	Pseudomonas stutzeri	84	0.00204609	Pseudomonas otitidis	58	0.00141277	Pseudomonas resinovorans	48	0.00116919
Polymicrobial	22M2100022	157712	166	Fusobacterium varium	33050	0.209559	Haemophilus sputorum	28703	0.181996	Haemophilus parainfluenzae	23272	0.14756	Streptococcus mitis	9617	0.0609782	Phascolarctobacterium faecium	8582	0.0544156	Gemella sanguinis	6407	0.0406247	Streptococcus australis	1049	0.00665136	Ruthenibacterium lactatiformans	661	0.00419118	Campylobacter concisus	648	0.00410876	Sutterella wadsworthensis	530	0.00336056	Bacteroides thetaiotaomicron	395	0.00250457	Erysipelatoclostridium ramosum	340	0.00215583
Monomicrobial	22M2100011	158523	66	Streptococcus dysgalactiae	156159	0.985087	Streptococcus agalactiae	295	0.00186093	Streptococcus parauberis	277	0.00174738	Streptococcus plurextorum	171	0.00107871	Streptococcus oralis	149	0.000939927	Streptococcus phocae	147	0.00092731	Streptococcus himalayensis	133	0.000838995	Streptococcus iniae	131	0.000826379	Streptococcus halichoeri	118	0.000744371	Streptococcus pyogenes	114	0.000719139	Streptococcus parasanguinis	100	0.000630823	Streptococcus canis	89	0.000561433
Polymicrobial	22M2100023	64116	282	Faecalibacterium prausnitzii	8183	0.127628	Oscillibacter valericigenes	8044	0.12546	Phascolarctobacterium faecium	7221	0.112624	Eubacterium limosum	2746	0.0428286	Odoribacter splanchnicus	2182	0.0340321	Pseudomonas aeruginosa	1517	0.0236602	Parabacteroides distasonis	867	0.0135224	Bacteroides vulgatus	784	0.0122278	Shigella sonnei	595	0.00928005	Victivallis vadensis	441	0.00687816	Klebsiella pneumoniae	430	0.00670659	Sutterella wadsworthensis	373	0.00581758
Monomicrobial	22M2100035	7578	58	Pseudomonas aeruginosa	6310	0.832674	Pelomonas saccharophila	394	0.0519926	Achromobacter kerstersii	317	0.0418316	Citrobacter murliniae	167	0.0220375	Pseudomonas oleovorans	74	0.00976511	Brevundimonas intermedia	73	0.00963315	Bradyrhizobium embrapense	24	0.00316706	Achromobacter deleyi	20	0.00263922	Brevundimonas vesicularis	19	0.00250726	Pseudomonas alcaligenes	16	0.00211138	Citrobacter freundii	13	0.00171549	Pseudomonas citronellolis	10	0.00131961
Polymicrobial	22M2100951	291082	161	Shigella boydii	156486	0.537601	Shigella flexneri	16585	0.0569771	Escherichia fergusonii	2670	0.00917267	Escherichia marmotae	1199	0.00411911	Shigella sonnei	1035	0.0035557	Enterococcus faecalis	826	0.00283769	Kosakonia sacchari	414	0.00142228	Shimwellia blattae	279	0.000958493	Citrobacter koseri	223	0.000766107	Salmonella enterica	171	0.000587463	Citrobacter farmeri	168	0.000577157	Escherichia albertii	115	0.000395078
Monomicrobial	22M2100886	6643	40	Staphylococcus epidermidis	6365	0.958151	Delftia tsuruhatensis	19	0.00286015	Staphylococcus petrasii	17	0.00255908	Staphylococcus hominis	16	0.00240855	Staphylococcus capitis	14	0.00210748	Staphylococcus muscae	14	0.00210748	Delftia lacustris	12	0.00180641	Staphylococcus piscifermentans	10	0.00150534	Staphylococcus lugdunensis	8	0.00120428	Staphylococcus saprophyticus	8	0.00120428	Staphylococcus caprae	7	0.00105374	Staphylococcus auricularis	6	0.000903206
Monomicrobial	22M2100935	3278	72	Proteus mirabilis	554	0.169005	Pseudomonas plecoglossicida	367	0.111959	Bacillus cereus	145	0.0442343	Acinetobacter baumannii	127	0.0387431	Staphylococcus pseudintermedius	118	0.0359976	Acinetobacter junii	118	0.0359976	Salmonella enterica	114	0.0347773	Halomonas muralis	109	0.033252	Acinetobacter soli	94	0.028676	Moraxella osloensis	74	0.0225747	Acinetobacter johnsonii	24	0.00732154	Halomonas xianhensis	23	0.00701647
Monomicrobial	22M2100873	61185	72	Staphylococcus haemolyticus	57874	0.945885	Pelomonas saccharophila	692	0.01131	Staphylococcus xylosus	346	0.00565498	Kocuria marina	291	0.00475607	Staphylococcus petrasii	193	0.00315437	Cutibacterium acnes	190	0.00310534	Staphylococcus devriesei	132	0.00215739	Staphylococcus edaphicus	125	0.00204298	Staphylococcus epidermidis	74	0.00120945	Delftia tsuruhatensis	71	0.00116042	Staphylococcus muscae	70	0.00114407	Delftia lacustris	67	0.00109504
Monomicrobial	22M2100945	2404	34	Streptococcus sanguinis	2157	0.897255	Microbacterium testaceum	84	0.0349418	Janthinobacterium lividum	26	0.0108153	Methylobacterium goesingense	19	0.00790349	Cutibacterium acnes	19	0.00790349	Sphingomonas panni	13	0.00540765	Sphingomonas faeni	9	0.00374376	Streptococcus oralis	9	0.00374376	Streptococcus gordonii	5	0.00207987	Streptococcus constellatus	3	0.00124792	Streptococcus cameli	3	0.00124792	Streptococcus himalayensis	3	0.00124792
Polymicrobial	22M2101036	105393	121	Parvimonas micra	72929	0.691972	[Eubacterium] brachy	6894	0.0654123	Oscillibacter valericigenes	4131	0.0391962	Mogibacterium timidum	3256	0.0308939	Mycoplasma salivarium	2688	0.0255045	Fusobacterium mortiferum	2556	0.0242521	Porphyromonas endodontalis	1925	0.018265	Prevotella oris	1131	0.0107313	Dialister pneumosintes	1062	0.0100766	[Eubacterium] minutum	1052	0.00998169	Prevotella nigrescens	641	0.006082	Solobacterium moorei	579	0.00549372
Monomicrobial	22M2101085	139951	63	Streptococcus dysgalactiae	137692	0.983859	Streptococcus parauberis	336	0.00240084	Streptococcus agalactiae	258	0.0018435	Streptococcus phocae	148	0.00105751	Streptococcus oralis	146	0.00104322	Streptococcus iniae	131	0.000936042	Streptococcus plurextorum	127	0.00090746	Streptococcus pyogenes	109	0.000778844	Streptococcus halichoeri	103	0.000735972	Streptococcus himalayensis	103	0.000735972	Streptococcus parasanguinis	95	0.000678809	Streptococcus canis	89	0.000635937
Monomicrobial	22M2100918	315	18	Enterococcus faecalis	221	0.701587	Janthinobacterium lividum	23	0.0730159	Abiotrophia defectiva	8	0.0253968	Moraxella osloensis	6	0.0190476	Ralstonia pickettii	5	0.015873	Methylobacterium platani	5	0.015873	Methylobacterium aquaticum	4	0.0126984	Sphingomonas phyllosphaerae	4	0.0126984	Sphingomonas paucimobilis	3	0.00952381	Cutibacterium acnes	2	0.00634921	Alkanindiges illinoisensis	2	0.00634921	Enterococcus rivorum	1	0.0031746
Polymicrobial	22M2101062	165285	206	Klebsiella pneumoniae	146928	0.888937	Veillonella parvula	3645	0.0220528	Haemophilus parainfluenzae	2366	0.0143147	Streptococcus gordonii	1131	0.00684273	Enterobacter cloacae	759	0.00459207	Streptococcus parasanguinis	640	0.0038721	Veillonella dispar	572	0.00346069	Klebsiella quasipneumoniae	510	0.00308558	Campylobacter concisus	448	0.00271047	Klebsiella aerogenes	374	0.00226276	Granulicatella adiacens	340	0.00205705	Kosakonia sacchari	236	0.00142784
Monomicrobial	22M2100924	62	3	Pseudomonas aeruginosa	28	0.451613	Comamonas jiangduensis	26	0.419355	Leuconostoc mesenteroides	5	0.0806452			0			0			0			0						0			0			0			0
Polymicrobial	22M2100895	127474	73	Parvimonas micra	57789	0.45334	Peptostreptococcus anaerobius	23558	0.184806	Fusobacterium nucleatum	7055	0.0553446	Dialister micraerophilus	2973	0.0233224	Peptoniphilus harei	2526	0.0198158	Bacteroides ovatus	744	0.00583648	Eggerthella lenta	230	0.00180429	Erysipelatoclostridium ramosum	128	0.00100413	Proteus mirabilis	94	0.000737405	Peptostreptococcus russellii	34	0.000266721	Fusobacterium simiae	25	0.000196118	Serratia marcescens	20	0.000156895
Monomicrobial	22M2100890	2862	46	Staphylococcus haemolyticus	1353	0.472746	Sphingomonas panni	212	0.0740741	Staphylococcus warneri	101	0.03529	Rubellimicrobium roseum	56	0.0195667	Pelomonas saccharophila	50	0.0174703	Planomicrobium glaciei	42	0.0146751	Moraxella osloensis	35	0.0122292	Kocuria marina	24	0.00838574	Rubellimicrobium mesophilum	5	0.00174703	Flavisolibacter ginsengisoli	5	0.00174703	Staphylococcus muscae	4	0.00139762	Staphylococcus petrasii	4	0.00139762
Polymicrobial	22M2101647	79753	75	Parvimonas micra	23544	0.295211	Filifactor alocis	14658	0.183792	Gemella morbillorum	11659	0.146189	Streptococcus intermedius	8621	0.108096	Campylobacter rectus	3752	0.0470453	Phocaeicola abscessus	3452	0.0432836	Tannerella forsythia	2609	0.0327135	Phascolarctobacterium faecium	2318	0.0290647	Porphyromonas gingivalis	2268	0.0284378	Fusobacterium mortiferum	2176	0.0272842	Fusobacterium nucleatum	732	0.00917834	Peptostreptococcus stomatis	582	0.00729753
Monomicrobial	22M2101674	8197	94	Staphylococcus epidermidis	4776	0.582652	Klebsiella pneumoniae	608	0.0741735	Massilia terrae	180	0.0219593	Proteus vulgaris	166	0.0202513	Citrobacter freundii	114	0.0139075	Shigella sonnei	109	0.0132975	Deinococcus aetherius	106	0.0129316	Delftia acidovorans	104	0.0126876	Ochrobactrum lupini	82	0.0100037	Roseomonas mucosa	62	0.00756374	Shigella dysenteriae	60	0.00731975	Massilia haematophila	47	0.00573381
Monomicrobial	22M2101641	20634	70	Citrobacter koseri	16063	0.778472	Citrobacter farmeri	108	0.00523408	Pelomonas saccharophila	75	0.00363478	Salmonella enterica	61	0.00295629	Massilia terrae	51	0.00247165	Kosakonia sacchari	27	0.00130852	Citrobacter amalonaticus	26	0.00126006	Salmonella bongori	24	0.00116313	Sphingomonas adhaesiva	22	0.0010662	Klebsiella pneumoniae	21	0.00101774	Salinicoccus salitudinis	20	0.000969274	Massilia haematophila	17	0.000823883
Monomicrobial	22M2101576	476	23	Enterococcus faecium	88	0.184874	Sphingomonas echinoides	61	0.128151	Lysobacter defluvii	59	0.12395	Klebsiella pneumoniae	50	0.105042	Pelomonas saccharophila	35	0.0735294	Ochrobactrum lupini	34	0.0714286	Massilia terrae	23	0.0483193	Lysobacter spongiicola	16	0.0336134	Cupriavidus metallidurans	13	0.0273109	Massilia haematophila	6	0.012605	Cupriavidus plantarum	3	0.00630252	Moraxella osloensis	2	0.00420168
Polymicrobial	22M2101573	144851	213	Parvimonas micra	42482	0.293281	Mogibacterium timidum	26777	0.184859	Peptostreptococcus stomatis	15580	0.107559	Faecalibacterium prausnitzii	7620	0.0526058	Pyramidobacter piscolens	6455	0.044563	Phascolarctobacterium faecium	6387	0.0440936	Dialister pneumosintes	1983	0.0136899	Oscillibacter valericigenes	1885	0.0130134	Ruthenibacterium lactatiformans	1588	0.010963	[Eubacterium] nodatum	1566	0.0108111	[Clostridium] citroniae	1380	0.00952703	Porphyromonas gingivalis	1356	0.00936134
Monomicrobial	22M2101540	8950	76	Corynebacterium striatum	3676	0.410726	Klebsiella pneumoniae	1841	0.205698	Shigella dysenteriae	441	0.0492737	Klebsiella quasipneumoniae	276	0.030838	Shigella sonnei	130	0.0145251	Salmonella enterica	67	0.00748603	Serratia fonticola	39	0.00435754	Corynebacterium vitaeruminis	14	0.00156425	Shigella flexneri	10	0.00111732	Bradyrhizobium embrapense	10	0.00111732	Klebsiella aerogenes	9	0.00100559	Corynebacterium aurimucosum	9	0.00100559
Polymicrobial	22M2101506	199289	229	Pyramidobacter piscolens	66669	0.334534	Fusobacterium varium	17862	0.0896286	Bacteroides vulgatus	14821	0.0743694	Anaerotignum lactatifermentans	7834	0.0393097	Phascolarctobacterium faecium	6557	0.032902	Proteus mirabilis	4078	0.0204627	Cloacibacillus evryensis	2615	0.0131216	Shigella dysenteriae	2004	0.0100557	Frisingicoccus caecimuris	1653	0.00829449	Oscillibacter valericigenes	1588	0.00796833	Christensenella minuta	1466	0.00735615	Fusobacterium nucleatum	1095	0.00549453
Polymicrobial	22M2101520	73895	78	Streptococcus pseudopneumoniae	45182	0.611435	Streptococcus salivarius	10733	0.145247	Streptococcus oralis	3138	0.0424657	Streptococcus mitis	1289	0.0174437	Streptococcus gordonii	813	0.0110021	Streptococcus pneumoniae	353	0.00477705	Klebsiella pneumoniae	151	0.00204344	Klebsiella quasipneumoniae	126	0.00170512	Streptococcus rubneri	119	0.00161039	Streptococcus constellatus	95	0.00128561	Streptococcus sanguinis	86	0.00116381	Streptococcus panodentis	83	0.00112322
Monomicrobial	22M2101703	150343	76	Staphylococcus aureus	144944	0.964089	Staphylococcus caprae	682	0.00453629	Staphylococcus petrasii	483	0.00321265	Staphylococcus hominis	374	0.00248764	Staphylococcus simiae	351	0.00233466	Staphylococcus xylosus	212	0.00141011	Staphylococcus haemolyticus	206	0.0013702	Staphylococcus piscifermentans	155	0.00103098	Bacillus tropicus	127	0.000844735	Staphylococcus devriesei	125	0.000831432	Staphylococcus cohnii	116	0.000771569	Staphylococcus lugdunensis	115	0.000764918
Monomicrobial	22M2101676	18984	90	Staphylococcus epidermidis	15521	0.817583	Shigella dysenteriae	380	0.0200169	Klebsiella quasipneumoniae	132	0.00695322	Klebsiella pneumoniae	111	0.00584703	Citrobacter freundii	99	0.00521492	Staphylococcus petrasii	70	0.00368732	Shigella sonnei	59	0.00310788	Staphylococcus hominis	40	0.00210704	Staphylococcus muscae	30	0.00158028	Novosphingobium panipatense	27	0.00142225	Staphylococcus caprae	23	0.00121155	Staphylococcus piscifermentans	23	0.00121155
Monomicrobial	22M2101690	7120	73	Staphylococcus epidermidis	4898	0.687921	Aeromonas caviae	553	0.0776685	Aeromonas hydrophila	293	0.0411517	Aeromonas dhakensis	138	0.019382	Pseudomonas oleovorans	132	0.0185393	Shigella dysenteriae	112	0.0157303	Citrobacter freundii	83	0.0116573	Proteus vulgaris	67	0.00941011	Shigella sonnei	31	0.00435393	Serratia fonticola	31	0.00435393	Citrobacter braakii	21	0.00294944	Staphylococcus petrasii	15	0.00210674
Polymicrobial	22M2101430	85310	52	Prevotella denticola	32390	0.379674	Parvimonas micra	19207	0.225144	Dialister invisus	9917	0.116247	Dialister pneumosintes	5605	0.0657016	Gemella morbillorum	3721	0.0436174	Fusobacterium nucleatum	3177	0.0372407	Streptococcus intermedius	1041	0.0122026	Campylobacter gracilis	935	0.01096	[Eubacterium] brachy	380	0.00445434	Prevotella intermedia	150	0.00175829	Prevotella scopos	62	0.000726761	Leptotrichia goodfellowii	50	0.000586098
Monomicrobial	22M2101288	31	2	Pseudomonas aeruginosa	25	0.806452	Enterococcus faecalis	4	0.129032			0			0			0			0			0						0			0			0			0
Polymicrobial	22M2101437	170785	171	Klebsiella pneumoniae	66740	0.390784	Klebsiella quasipneumoniae	10218	0.0598296	Shigella dysenteriae	2214	0.0129637	Shigella sonnei	1566	0.00916942	Escherichia marmotae	822	0.00481307	Shigella flexneri	815	0.00477208	Enterobacter cloacae	600	0.00351319	Citrobacter amalonaticus	522	0.00305647	Kosakonia sacchari	303	0.00177416	Klebsiella aerogenes	293	0.00171561	Escherichia fergusonii	291	0.0017039	Pectobacterium aroidearum	139	0.000813889
Monomicrobial	22M2101414	121997	62	Fusobacterium nucleatum	85848	0.703689	Streptococcus intermedius	26263	0.215276	[Eubacterium] brachy	9092	0.0745264	Streptococcus constellatus	111	0.000909858	Fusobacterium canifelinum	101	0.000827889	Streptococcus sinensis	65	0.0005328	Streptococcus anginosus	58	0.000475422	Fusobacterium gastrosuis	52	0.00042624	Streptococcus gordonii	48	0.000393452	Streptococcus pseudopneumoniae	33	0.000270498	Fusobacterium periodonticum	32	0.000262302	Fusobacterium simiae	32	0.000262302
Polymicrobial	22M2101404	582	14	Neisseria macacae	467	0.802405	Neisseria sicca	28	0.04811	Klebsiella quasipneumoniae	24	0.0412371	Bradyrhizobium embrapense	17	0.0292096	Brevundimonas vesicularis	13	0.0223368	Brevundimonas nasdae	4	0.00687285	Klebsiella pneumoniae	2	0.00343643	Neisseria mucosa	2	0.00343643	Neisseria perflava	2	0.00343643	Cronobacter muytjensii	1	0.00171821	Neisseria bacilliformis	1	0.00171821	Neisseria iguanae	1	0.00171821
Polymicrobial	22M2101351	31674	82	Klebsiella pneumoniae	27364	0.863926	Klebsiella quasipneumoniae	3026	0.0955358	Enterobacter cloacae	153	0.00483046	Klebsiella aerogenes	71	0.00224159	Kosakonia sacchari	47	0.00148387	Pectobacterium aroidearum	29	0.000915577	Pectobacterium carotovorum	27	0.000852434	Kosakonia oryzae	24	0.000757719	Enterobacter soli	12	0.00037886	Tatumella terrea	12	0.00037886	Cedecea lapagei	9	0.000284145	Erwinia amylovora	8	0.000252573
Monomicrobial	22M2101301	5499	42	Pantoea stewartii	86	0.0156392	Pantoea ananatis	48	0.00872886	Erwinia tasmaniensis	36	0.00654664	Pseudescherichia vulneris	28	0.00509183	Tatumella terrea	28	0.00509183	Pantoea allii	22	0.00400073	Pantoea agglomerans	14	0.00254592	Tatumella morbirosei	13	0.00236407	Citrobacter freundii	12	0.00218221	Pectobacterium aroidearum	11	0.00200036	Tatumella punctata	8	0.00145481	Shimwellia blattae	7	0.00127296
Monomicrobial	22M2101395	49580	108	Citrobacter murliniae	28819	0.581263	Citrobacter freundii	18035	0.363756	Tatumella punctata	99	0.00199677	Pseudomonas aeruginosa	89	0.00179508	Sphingomonas aquatilis	65	0.00131101	Kosakonia sacchari	64	0.00129084	Pectobacterium aroidearum	48	0.000968132	Klebsiella oxytoca	47	0.000947963	Serratia ureilytica	47	0.000947963	Shimwellia blattae	35	0.00070593	Edwardsiella anguillarum	33	0.000665591	Cnuella takakiae	32	0.000645422
Monomicrobial	22M2101259	90	7	Campylobacter jejuni	79	0.877778	Aeromonas caviae	2	0.0222222	Shigella boydii	1	0.0111111	Shigella sonnei	1	0.0111111	Campylobacter coli	1	0.0111111	Campylobacter lari	1	0.0111111	Campylobacter subantarcticus	1	0.0111111						0			0			0			0
Monomicrobial	22M2101274	842	20	Klebsiella pneumoniae	385	0.457245	Enterococcus faecalis	298	0.353919	Bradyrhizobium embrapense	114	0.135392	Staphylococcus hominis	10	0.0118765	Methylobacterium goesingense	8	0.00950119	Klebsiella quasipneumoniae	2	0.0023753	Klebsiella aerogenes	1	0.00118765	Enterobacter cloacae	1	0.00118765	Kosakonia oryzae	1	0.00118765	Kosakonia sacchari	1	0.00118765	Pantoea agglomerans	1	0.00118765	Tatumella punctata	1	0.00118765
Monomicrobial	22M2101508	43051	93	Staphylococcus lugdunensis	40772	0.947063	Staphylococcus hominis	304	0.00706139	Staphylococcus petrasii	143	0.00332164	Klebsiella pneumoniae	136	0.00315904	Staphylococcus devriesei	112	0.00260157	Staphylococcus epidermidis	106	0.0024622	Staphylococcus haemolyticus	101	0.00234605	Paracoccus chinensis	87	0.00202086	Staphylococcus auricularis	71	0.00164921	Staphylococcus edaphicus	71	0.00164921	Novosphingobium guangzhouense	57	0.00132401	Pseudomonas oleovorans	56	0.00130078
Polymicrobial	22M2101341	1378	33	Enterococcus faecalis	874	0.634253	Cutibacterium acnes	142	0.103048	Stenotrophomonas maltophilia	79	0.0573295	Staphylococcus capitis	58	0.04209	Roseomonas aquatica	31	0.0224964	Halomonas alkaliantarctica	23	0.0166909	Bradyrhizobium embrapense	16	0.011611	Halomonas meridiana	13	0.00943396	Methylobacterium goesingense	7	0.00507983	Stenotrophomonas pavanii	6	0.00435414	Methylobacterium bullatum	4	0.00290276	Escherichia marmotae	3	0.00217707
Monomicrobial	22M2101384	137601	130	Klebsiella pneumoniae	125003	0.908445	Klebsiella quasipneumoniae	6942	0.0504502	Enterobacter cloacae	747	0.00542874	Klebsiella aerogenes	456	0.00331393	Kosakonia sacchari	221	0.00160609	Pectobacterium aroidearum	183	0.00132993	Kosakonia radicincitans	114	0.000828482	Serratia marcescens	67	0.000486915	Tatumella punctata	44	0.000319765	Tatumella terrea	40	0.000290696	Pectobacterium carotovorum	39	0.000283428	Raoultella planticola	36	0.000261626
Monomicrobial	22M2101478	714	29	Enterococcus faecium	303	0.42437	Acinetobacter johnsonii	96	0.134454	Sphingomonas lutea	76	0.106443	Moraxella osloensis	52	0.0728291	Pseudomonas plecoglossicida	10	0.0140056	Pseudomonas umsongensis	6	0.00840336	Sphingomonas sediminicola	5	0.0070028	Paracoccus sanguinis	5	0.0070028	Caulobacter fusiformis	3	0.00420168	Caulobacter mirabilis	3	0.00420168	Bradyrhizobium embrapense	3	0.00420168	Enterococcus avium	3	0.00420168
Monomicrobial	22M2101470	6914	52	Staphylococcus lugdunensis	6031	0.872288	Delftia acidovorans	250	0.0361585	Bradyrhizobium embrapense	102	0.0147527	Ochrobactrum lupini	74	0.0107029	Sphingopyxis solisilvae	59	0.00853341	Staphylococcus hominis	49	0.00708707	Brachybacterium faecium	39	0.00564073	Bacillus niabensis	24	0.00347122	Lactobacillus iners	24	0.00347122	Staphylococcus petrasii	18	0.00260341	Pseudomonas plecoglossicida	16	0.00231415	Staphylococcus auricularis	16	0.00231415
Monomicrobial	22M2102932	23787	51	Staphylococcus aureus	22756	0.956657	Staphylococcus caprae	203	0.00853407	Staphylococcus petrasii	98	0.0041199	Staphylococcus hominis	66	0.00277462	Staphylococcus simiae	62	0.00260647	Staphylococcus haemolyticus	44	0.00184975	Staphylococcus epidermidis	42	0.00176567	Staphylococcus piscifermentans	36	0.00151343	Staphylococcus xylosus	34	0.00142935	Staphylococcus cohnii	25	0.00105099	Staphylococcus capitis	24	0.00100895	Macrococcus caseolyticus	23	0.000966915
Polymicrobial	22M2103050	40817	16	Filifactor alocis	29028	0.711174	Fusobacterium nucleatum	7285	0.17848	Treponema socranskii	3730	0.0913835	Fretibacterium fastidiosum	366	0.00896685	Tannerella forsythia	194	0.00475292	[Eubacterium] saphenum	66	0.00161697	Treponema maltophilum	46	0.00112698	Actinomyces israelii	44	0.00107798	Porphyromonas gingivalis	35	0.000857486	Fusobacterium canifelinum	5	0.000122498	Fusobacterium simiae	5	0.000122498	Fusobacterium gastrosuis	3	7.34988e-05
Polymicrobial	22M2103124	6184	55	Klebsiella pneumoniae	5129	0.829398	Klebsiella quasipneumoniae	601	0.0971863	Streptococcus salivarius	47	0.00760026	Enterobacter cloacae	40	0.00646831	Veillonella parvula	22	0.00355757	Haemophilus parainfluenzae	20	0.00323415	Streptococcus agalactiae	13	0.0021022	Klebsiella aerogenes	11	0.00177878	Kosakonia sacchari	7	0.00113195	Granulicatella elegans	6	0.000970246	Kosakonia radicincitans	4	0.000646831	Pectobacterium aroidearum	4	0.000646831
Monomicrobial	22M2103142	23269	64	Escherichia fergusonii	61	0.00262151	Kosakonia sacchari	35	0.00150415	Citrobacter koseri	28	0.00120332	Escherichia coli	19	0.000816537	Methylobacterium longum	19	0.000816537	Janibacter melonis	19	0.000816537	Shimwellia blattae	15	0.000644634	Bradyrhizobium embrapense	12	0.000515708	Citrobacter amalonaticus	11	0.000472732	Erwinia amylovora	10	0.000429756	Mesorhizobium amorphae	7	0.000300829	Escherichia marmotae	6	0.000257854
Monomicrobial	22M2009749	198092	21	Paraclostridium benzoelyticum	150916	0.761848	Paraclostridium bifermentans	44216	0.223209	Paeniclostridium sordellii	648	0.00327121	Paeniclostridium ghonii	75	0.000378612	Asaccharospora irregularis	65	0.00032813	[Eubacterium] tenue	44	0.000222119	Clostridioides difficile	37	0.000186782	Romboutsia lituseburensis	23	0.000116108	[Clostridium] dakarense	23	0.000116108	Intestinibacter bartlettii	12	6.05779e-05	Sporacetigenium mesophilum	12	6.05779e-05	Streptococcus mitis	7	3.53371e-05
Monomicrobial	22M2103182	79566	118	Klebsiella pneumoniae	67995	0.854574	Klebsiella quasipneumoniae	8233	0.103474	Enterobacter cloacae	441	0.00554257	Klebsiella aerogenes	263	0.00330543	Pectobacterium aroidearum	114	0.00143277	Kosakonia sacchari	77	0.00096775	Kosakonia oryzae	64	0.000804364	Serratia marcescens	50	0.000628409	Tatumella terrea	37	0.000465023	Shimwellia blattae	26	0.000326773	Pectobacterium carotovorum	24	0.000301636	Kosakonia radicincitans	20	0.000251364

## Sheet: Emu_data
Supplementary 2 Twelve most abundant species of each sample classified by EMU
No. of cultured species	Sample ID	Assigned read count	Unassigned read count	No. of classified species	Organism 1		Organism 2		Organism 3		Organism 4		Organism 5		Organism 6		Organism 7		Organism 8		Organism 9		Organism 10		Organism 11		Organism 12
					taxid	rel_abundance	taxid	rel_abundance	taxid	rel_abundance	taxid	rel_abundance	taxid	rel_abundance	taxid	rel_abundance	taxid	rel_abundance	taxid	rel_abundance	taxid	rel_abundance	taxid	rel_abundance	taxid	rel_abundance	taxid	rel_abundance
None	20MB069698	No reads	No reads	N/A
None	19MB067693	17	119	5	Methylobacterium aquaticum	0.375	Granulicatella elegans	0.3125	Veillonella ratti	0.1875	Roseomonas mucosa	0.0625	Roseomonas sp. FDAARGOS_362	0.0625
None	18MB380975	57	2	7	Methylobacterium aquaticum	0.631579	Staphylococcus cohnii	0.175439	Jeotgalicoccus huakuii	0.087719	Rheinheimera japonica	0.035088	Methylorubrum extorquens	0.026316	Methylorubrum zatmanii	0.026316	[Polyangium] brachysporum	0.017544
None	19MB069145	4	79	1	Fusobacterium nucleatum	1
None	19MB068751	211	170	17	Staphylococcus epidermidis	0.260353	Staphylococcus hominis	0.194313	Staphylococcus cohnii	0.184834	Staphylococcus capitis	0.07614	Acinetobacter lwoffii	0.07109	Escherichia coli	0.066351	Methylobacterium aquaticum	0.037915	Amniculibacterium aquaticum	0.018957	Salinicoccus salitudinis	0.018957	Erysipelothrix larvae	0.014218	Paracoccus marinus	0.009479	Corynebacterium massiliense	0.009479
None	18MB084305	2402	47	1	Streptococcus canis	1
None	19MB090618	96791	546	8	Streptococcus pneumoniae	0.988927	Fusobacterium periodonticum	0.004694	Campylobacter showae	0.003546	Escherichia coli	0.001799	Methylobacterium aquaticum	0.000434	Laceyella sacchari	0.000238	Staphylococcus epidermidis	0.000186	Haemophilus parainfluenzae	0.000176
None	20MB068970	1143	71	13	Prevotella oris	0.36718	Lactobacillus delbrueckii	0.201269	Streptococcus oralis	0.122376	Streptococcus anginosus	0.092608	Moraxella osloensis	0.057117	Haemophilus parainfluenzae	0.034451	Streptococcus sp. FDAARGOS_192	0.025385	Streptococcus intermedius	0.022533	Prevotella veroralis	0.019946	Howardella ureilytica	0.019946	Limosilactobacillus fermentum	0.014506	Enterococcus faecium	0.011786
None	19MB069360	68	539	6	Escherichia coli	0.426471	Methylobacterium aquaticum	0.294118	Sporosarcina koreensis	0.175647	Laceyella sacchari	0.044118	Sporosarcina luteola	0.030236	Altererythrobacter xinjiangensis	0.029412
None	20MP2015465	2913	9720	29	Methylobacterium bullatum	0.184397	Sphingomonas hankookensis	0.157775	Methylobacterium aquaticum	0.121543	Melaminivora sp. SC2-9	0.077317	Paracoccus chinensis	0.071342	Planctomyces sp. SH-PL62	0.048431	Pseudomonas oleovorans	0.045136	Pantoea vagans	0.04401	Ochrobactrum anthropi	0.028961	Sphingomonas melonis	0.025674	Exiguobacterium sp. ZWU0009	0.024654	Sphingomonas sp. FARSPH	0.017589
None	20MP2015461	929	75055	48	Enterococcus cecorum	0.159091	Methylobacterium aquaticum	0.149644	Staphylococcus aureus	0.12013	Methylobacterium marchantiae	0.085495	Escherichia coli	0.076488	Enterococcus sp. FDAARGOS_375	0.058007	Laceyella sacchari	0.034632	Paracoccus chinensis	0.033227	Alteromonas mediterranea	0.026795	Brevundimonas sp. GW460-12-10-14-LB2	0.026149	Streptococcus mitis	0.025975	Acinetobacter baumannii	0.025974
None	20MP2015462	4200	17236	28	Methylobacterium aquaticum	0.164346	Sphingomonas roseiflava	0.126718	Facklamia hominis	0.10029	Methylobacterium bullatum	0.097118	Escherichia coli	0.092073	Sphingomonas hankookensis	0.078944	Acinetobacter johnsonii	0.0438	Methylorubrum populi	0.041472	Pseudoxanthomonas taiwanensis	0.037458	Methylobacterium sp. 17Sr1-43	0.032141	Staphylococcus hominis	0.029966	Massilia timonae	0.025375
Polymicrobial	20MP2013809	344587	680	12	Streptococcus anginosus	0.959419	Prevotella denticola	0.038845	Fusobacterium nucleatum	0.000656	Laceyella sacchari	0.000453	Howardella ureilytica	0.000151	Dialister pneumosintes	0.000145	Streptococcus pneumoniae	0.000107	Streptococcus milleri	6.01e-05	Methylobacterium bullatum	4.64e-05	Megasphaera micronuciformis	4.35e-05	Escherichia coli	4.06e-05	Chryseomicrobium palamuruense	3.19e-05
Monomicrobial	20MP2014075	6696	4001	5	Burkholderia cenocepacia	0.894705	Escherichia coli	0.077467	Methylobacterium aquaticum	0.013688	Paracoccus chinensis	0.009701	Paracoccus contaminans	0.004439
Monomicrobial	20MP2014874	2849	43936	20	Escherichia coli	0.317801	Staphylococcus capitis	0.120416	Paracoccus chinensis	0.10055	Methylobacterium aquaticum	0.086133	Paracoccus contaminans	0.049191	Moraxella osloensis	0.048606	Melaminivora sp. SC2-9	0.045032	Staphylococcus aureus	0.041846	Paracoccus marinus	0.036306	Paracoccus huijuniae	0.034467	Pseudomonas oleovorans	0.025675	Sphingomonas qilianensis	0.018705
Polymicrobial	20MP2014925	11687	10135	10	Escherichia coli	0.865624	Staphylococcus aureus	0.051974	Staphylococcus capitis	0.045351	Methylobacterium aquaticum	0.015809	Methylorubrum populi	0.010654	Paracoccus chinensis	0.004786	Paracoccus contaminans	0.002173	Staphylococcus epidermidis	0.001309	Pseudomonas oleovorans	0.001289	Desulfosporosinus acidiphilus	0.001031
Monomicrobial	20MP2014868	960	23952	23	Escherichia coli	0.669367	Methylobacterium aquaticum	0.201746	Pseudomonas aeruginosa	0.025065	Haemophilus influenzae	0.016705	Staphylococcus haemolyticus	0.014599	Laceyella sacchari	0.014599	Sphingomonas hankookensis	0.01147	Acinetobacter baumannii	0.010384	Methylobacterium terrae	0.00977	Neptuniibacter caesariensis	0.006257	Methylobacterium indicum	0.003292	Mannheimia haemolytica	0.00267
Monomicrobial	20MP4201137	346671	10736	5	Pseudomonas aeruginosa	0.999239	Laceyella sacchari	0.000339	Methylobacterium aquaticum	0.000182	Acinetobacter baumannii	0.000121	Paracoccus chinensis	0.000118
Polymicrobial	19B1413481	223773	5	62	Streptococcus intermedius	0.193471	Streptococcus salivarius	0.171189	Peptostreptococcus stomatis	0.143213	Veillonella parvula	0.133126	Streptococcus sp. FDAARGOS_192	0.121564	Streptococcus milleri	0.062476	Streptococcus gordonii	0.033733	Streptococcus anginosus	0.028162	Klebsiella pneumoniae	0.017574	Paraclostridium benzoelyticum	0.013653	Haemophilus parainfluenzae	0.012914	Parvimonas micra	0.008956
Polymicrobial	19B1413498	137782	2	42	Parvimonas micra	0.572228	Streptococcus anginosus	0.125572	Streptococcus milleri	0.080893	Peptostreptococcus stomatis	0.05766	Gemella morbillorum	0.038147	Streptococcus periodonticum	0.030775	[Eubacterium] infirmum	0.023629	Escherichia coli	0.021085	Phascolarctobacterium faecium	0.01209	Pyramidobacter piscolens	0.009121	Mogibacterium timidum	0.005068	Eubacterium limosum	0.004478
Monomicrobial	19B1414530	202859	3	4	Staphylococcus aureus	0.999695	Laceyella sacchari	0.000182	Escherichia coli	7.4e-05	Parvimonas micra	4.93e-05
Polymicrobial	19B1584185	261466	33	132	Parvimonas micra	0.256912	Peptostreptococcus stomatis	0.223689	Comamonas kerstersii	0.14811	Escherichia coli	0.076807	Filifactor alocis	0.052689	Christensenella massiliensis	0.050585	Ihubacter massiliensis	0.031886	Flintibacter sp. KGMB00164	0.024736	Christensenella minuta	0.02317	Anaerotignum faecicola	0.015547	Coprococcus catus	0.009534	Christensenella timonensis	0.007082
Polymicrobial	19B1591103	109281	6	24	Parvimonas micra	0.880611	Peptostreptococcus stomatis	0.090136	Streptococcus intermedius	0.006996	Streptococcus milleri	0.004587	Peptostreptococcus anaerobius	0.003919	Mogibacterium timidum	0.00213	Phascolarctobacterium faecium	0.002015	Dialister pneumosintes	0.001979	Escherichia coli	0.00142	Comamonas kerstersii	0.001017	Oscillibacter valericigenes	0.000692	[Eubacterium] infirmum	0.00062
Monomicrobial	19B1591110	73615	0	2	Staphylococcus aureus	0.999815	Laceyella sacchari	0.000185
Monomicrobial	19B1592898	242984	1	35	Staphylococcus aureus	0.991411	Streptococcus mitis	0.002033	Gemella haemolysans	0.001177	Haemophilus haemolyticus	0.00059	Haemophilus parainfluenzae	0.000556	Staphylococcus haemolyticus	0.000502	Escherichia coli	0.000408	Haemophilus sp. oral taxon 036	0.000353	Aggregatibacter segnis	0.000309	Parvimonas micra	0.000218	Acinetobacter proteolyticus	0.000193	Streptococcus sp. A12	0.000177
Polymicrobial	19B1608526	136467	12	76	Parvimonas micra	0.369148	[Eubacterium] nodatum	0.152385	Gemella morbillorum	0.123624	Peptostreptococcus stomatis	0.112258	Fusobacterium necrophorum	0.054389	Streptococcus australis	0.05333	[Eubacterium] minutum	0.022172	Streptococcus oralis	0.020399	Aminipila sp. JN-18	0.015645	Streptococcus sanguinis	0.013916	Aminipila butyrica	0.008353	Mogibacterium diversum	0.007518
Polymicrobial	19B1610381	366650	12	43	Parvimonas micra	0.860589	Streptococcus milleri	0.096192	Peptostreptococcus stomatis	0.013507	Klebsiella pneumoniae	0.009092	Fusobacterium nucleatum	0.005558	[Eubacterium] nodatum	0.004034	Christensenella minuta	0.001741	Christensenella massiliensis	0.001431	Streptococcus constellatus	0.00125	Ihubacter massiliensis	0.00107	Escherichia coli	0.000718	Ruthenibacterium lactatiformans	0.000584
Monomicrobial	19B2123916	198731	0	2	Staphylococcus aureus	0.99975	Laceyella sacchari	0.00025
Polymicrobial	19B2135719	226332	10	143	Gemmiger formicilis	0.25642	Romboutsia timonensis	0.219638	Clostridium perfringens	0.114519	Escherichia coli	0.08649	Clostridium paraputrificum	0.045893	Citrobacter koseri	0.044752	Phocaeicola coprocola	0.029439	Morganella morganii	0.028052	Granulicatella elegans	0.020847	Streptococcus sp. LPB0220	0.016347	Intestinibacter bartlettii	0.015683	Clostridium disporicum	0.013306
Polymicrobial	19B2024141	27419	1	36	Stenotrophomonas maltophilia	0.307733	Corynebacterium striatum	0.229072	Streptococcus anginosus	0.130325	Streptococcus oralis	0.077734	Staphylococcus haemolyticus	0.041059	Streptococcus milleri	0.036246	Staphylococcus epidermidis	0.032251	Streptococcus salivarius	0.02487	Parvimonas micra	0.019398	Mogibacterium timidum	0.018409	[Eubacterium] sulci	0.015274	Pseudomonas aeruginosa	0.013469
Polymicrobial	19B2146827	232442	3	91	Parvimonas micra	0.274157	Peptostreptococcus stomatis	0.25851	Dialister pneumosintes	0.116028	Streptococcus milleri	0.110066	Gemella morbillorum	0.104858	Solobacterium moorei	0.035412	Streptococcus dysgalactiae	0.016572	Mogibacterium timidum	0.009857	Bacteroides fragilis	0.009305	Pyramidobacter piscolens	0.005478	Catonella morbi	0.00478	Anaerostipes hadrus	0.004246
None	19B2153436	232327	2	13	Streptococcus intermedius	0.798041	Parvimonas micra	0.164847	Dialister pneumosintes	0.029824	Campylobacter rectus	0.003375	Fusobacterium nucleatum	0.001821	[Eubacterium] brachy	0.001141	Laceyella sacchari	0.000337	Streptococcus milleri	0.000164	Prevotella baroniae	0.000129	Streptococcus anginosus	0.000127	Porphyromonas endodontalis	9.04e-05	Streptococcus sanguinis	5.46e-05
Monomicrobial	20B0927194	255605	6	21	Parvimonas micra	0.392398	Streptococcus intermedius	0.37101	Gemella morbillorum	0.183749	Peptostreptococcus stomatis	0.042766	Peptostreptococcus anaerobius	0.001983	Streptococcus anginosus	0.001971	Gemella haemolysans	0.001564	Campylobacter concisus	0.001456	Gemella sanguinis	0.000899	Streptococcus periodonticum	0.000474	Laceyella sacchari	0.000413	Streptococcus milleri	0.00031
Monomicrobial	20B1025354	1104	1	15	Klebsiella pneumoniae	0.340434	Parvimonas micra	0.137177	Moraxella osloensis	0.134275	Gemella morbillorum	0.081511	Staphylococcus warneri	0.06067	Escherichia coli	0.04599	Peptostreptococcus stomatis	0.039761	Streptococcus intermedius	0.038767	Staphylococcus haemolyticus	0.024942	Acinetobacter haemolyticus	0.024033	Ihubacter massiliensis	0.017893	Staphylococcus arlettae	0.016795
None	19B2153759	1101	9	11	Parvimonas micra	0.477451	Streptococcus milleri	0.163725	Escherichia coli	0.091176	Cutibacterium acnes	0.051961	Acinetobacter lwoffii	0.040196	Comamonas kerstersii	0.039216	Sphingomonas hankookensis	0.031373	Peptostreptococcus stomatis	0.030392	Methylobacterium bullatum	0.028431	Leuconostoc carnosum	0.02451	Christensenella minuta	0.021569	Clostridium disporicum	0.013306
Monomicrobial	21B0926485	339935	9	50	Streptococcus sp. FDAARGOS_522	0.766554	Streptococcus agalactiae	0.203019	Streptococcus sp. FDAARGOS_520	0.01468	Acinetobacter schindleri	0.004622	Acinetobacter lwoffii	0.002161	Massilia timonae	0.001198	Escherichia coli	0.000899	Streptococcus milleri	0.000834	Paraflavitalea soli	0.000801	Alkanindiges illinoisensis	0.000592	Brevundimonas sp. SGAir0440	0.000569	Cytophaga hutchinsonii	0.000386
Monomicrobial	21B0926409	17387	1	11	Staphylococcus aureus	0.976767	Escherichia coli	0.00686	Streptococcus milleri	0.002767	Enterococcus faecium	0.002479	Ideonella sakaiensis	0.002479	Streptococcus pasteurianus	0.002421	Novosphingobium sp. THN1	0.001845	Brevundimonas sp. GW460-12-10-14-LB2	0.001268	Acinetobacter lwoffii	0.001153	Noviherbaspirillum soli	0.001095	Alkanindiges illinoisensis	0.000865
Monomicrobial	21B0921459	267005	5	2	Staphylococcus aureus	0.999791	Laceyella sacchari	0.000209
Monomicrobial	21B0935230	220128	5	2	Staphylococcus aureus	0.999749	Laceyella sacchari	0.000251
Polymicrobial	21B1705131	382397	12	87	Parvimonas micra	0.549608	Peptostreptococcus stomatis	0.091672	Dialister pneumosintes	0.080703	Enterococcus faecalis	0.060374	Escherichia coli	0.050124	Streptococcus intermedius	0.041849	Enterococcus avium	0.027509	Bacteroides fragilis	0.022721	Dialister invisus	0.015814	Fusobacterium nucleatum	0.007873	Eggerthella lenta	0.006465	Anaeroglobus geminatus	0.005825
Polymicrobial	21MB105254	103936	2	5	Klebsiella pneumoniae	0.614265	Streptococcus sp. FDAARGOS_522	0.295363	Streptococcus agalactiae	0.082552	Streptococcus sp. FDAARGOS_520	0.007259	Laceyella sacchari	0.00056
Monomicrobial	21MB105242	70062	16	7	Staphylococcus aureus	0.987914	Bacillus altitudinis	0.006125	Escherichia coli	0.004026	Haemophilus parainfluenzae	0.001156	Pseudomonas aeruginosa	0.000286	Listeria monocytogenes	0.000286	Laceyella sacchari	0.000208
Monomicrobial	21MB060114	76619	3	6	Klebsiella pneumoniae	0.998386	Laceyella sacchari	0.000545	Escherichia coli	0.000442	Bacillus subtilis	0.000261	Staphylococcus aureus	0.000209	Salmonella enterica	0.000157
Monomicrobial	D151144	241593	1	15	Escherichia coli	0.997068	Melaminivora alkalimesophila	0.000816	Comamonas kerstersii	0.000426	Sphingomonas paucimobilis	0.000319	Shigella flexneri	0.000293	Sphingomonas hankookensis	0.000286	Sphingobacterium cellulitidis	0.000236	Janibacter limosus	9.94e-05	Moraxella osloensis	9.11e-05	Fusobacterium ulcerans	7.04e-05	Acinetobacter junii	7.04e-05	Acidovorax temperans	6.21e-05
Monomicrobial	D151127	183957	0	6	Acinetobacter pittii	0.991315	Acinetobacter calcoaceticus	0.008071	Acinetobacter oleivorans	0.000289	Acinetobacter lactucae	0.000161	Laceyella sacchari	8.82e-05	Sphingomonas hankookensis	7.61e-05
Polymicrobial	D304621	196821	1	25	Escherichia coli	0.908578	Fusobacterium ulcerans	0.058281	Bacteroides fragilis	0.008226	Campylobacter gracilis	0.007933	Megasphaera micronuciformis	0.006378	Haemophilus parainfluenzae	0.002717	[Ruminococcus] gnavus	0.002285	Lactobacillus crispatus	0.001413	Lactobacillus gasseri	0.001011	Fusobacterium varium	0.00051	Streptococcus sp. LPB0220	0.000468	Shigella flexneri	0.000306
Monomicrobial	D151207	204552	0	2	Klebsiella pneumoniae	0.999948	Laceyella sacchari	5.22e-05
Monomicrobial	D151193	176805	4	4	Streptococcus dysgalactiae	0.997317	Escherichia coli	0.001658	Laceyella sacchari	0.000958	Bacteroides fragilis	6.79e-05
Monomicrobial	D151203	110052	1	78	Escherichia coli	0.323328	Peptostreptococcus stomatis	0.277306	Parvimonas micra	0.076183	Faecalibacterium prausnitzii	0.054671	Gemella morbillorum	0.047187	Dysosmobacter welbionis	0.043274	Bacteroides fragilis	0.032163	Enterocloster aldensis	0.020756	Porphyromonas endodontalis	0.016741	Anaerotignum faecicola	0.011949	[Eubacterium] nodatum	0.011521	Campylobacter rectus	0.009674
Polymicrobial	D151204	159067	0	121	Peptostreptococcus stomatis	0.405574	Parvimonas micra	0.126358	Faecalibacterium prausnitzii	0.078509	Alloprevotella tannerae	0.064323	Dysosmobacter welbionis	0.048712	Bacteroides fragilis	0.031745	Escherichia coli	0.026097	Fusobacterium nucleatum	0.017132	Porphyromonas endodontalis	0.015868	Enterocloster aldensis	0.015784	Oscillibacter valericigenes	0.015338	Campylobacter rectus	0.013563
Monomicrobial	21M2014854	189513	0	1	Escherichia coli	1
Polymicrobial	21M2014857	191015	0	58	Parvimonas micra	0.846561	Bacteroides fragilis	0.037706	[Clostridium] symbiosum	0.027723	Porphyromonas endodontalis	0.017462	[Eubacterium] minutum	0.008809	Ruthenibacterium lactatiformans	0.006386	Mogibacterium timidum	0.005741	Enterocloster citroniae	0.00539	Faecalibacterium prausnitzii	0.005082	Campylobacter showae	0.004275	Escherichia coli	0.004001	Fusobacterium nucleatum	0.003638
Monomicrobial	21M2014906	16415	36	36	Deinococcus geothermalis	0.55506	Kocuria massiliensis	0.127283	Ralstonia mannitolilytica	0.102608	Effusibacillus pohliae	0.072436	Comamonas kerstersii	0.014964	Enterococcus sp. FDAARGOS_375	0.012093	Pelomonas saccharophila	0.010383	Melaminivora alkalimesophila	0.009039	Curvibacter delicatus	0.009039	Ruthenibacterium lactatiformans	0.007879	Noviherbaspirillum soli	0.007336	Sphingomonas changbaiensis	0.006535
Monomicrobial	21M2015020	68273	20	44	Staphylococcus aureus	0.699893	Deinococcus geothermalis	0.191777	Ralstonia mannitolilytica	0.03492	Effusibacillus pohliae	0.03287	Sphingomonas paucimobilis	0.00456	Flavisolibacter ginsenosidimutans	0.003621	Burkholderia stabilis	0.003401	Phreatobacter oligotrophus	0.003005	Pelomonas saccharophila	0.002566	Sphingomonas echinoides	0.002434	Sphingomonas hankookensis	0.00214	Denitratisoma oestradiolicum	0.00191
Polymicrobial	21M2015021	222225	11	41	Klebsiella pneumoniae	0.892754	Streptococcus salivarius	0.032138	Streptococcus agalactiae	0.028938	Deinococcus geothermalis	0.018105	Effusibacillus pohliae	0.004334	Ralstonia mannitolilytica	0.003281	Streptococcus sanguinis	0.00279	Veillonella parvula	0.002579	Granulicatella adiacens	0.002187	Sphingomonas hankookensis	0.001916	Gemella haemolysans	0.001589	Sphingomonas paucimobilis	0.001341
Monomicrobial	21M2015022	69916	91	31	Staphylococcus aureus	0.759201	Deinococcus geothermalis	0.137867	Effusibacillus pohliae	0.028044	Ralstonia mannitolilytica	0.015353	Phreatobacter oligotrophus	0.007097	Sphingomonas sp. FARSPH	0.006981	Methylobacterium aquaticum	0.006324	Sphingomonas echinoides	0.006095	Sphingomonas changbaiensis	0.005122	Sphingomonas hankookensis	0.004018	Pelomonas saccharophila	0.003949	Methylobacterium organophilum	0.002676
Monomicrobial	21M2015310	21539	0	14	Staphylococcus aureus	0.923876	Deinococcus geothermalis	0.043021	Aliterella antarctica	0.009871	Effusibacillus pohliae	0.007869	Ralstonia mannitolilytica	0.005866	Sphingomonas hankookensis	0.002475	Phreatobacter oligotrophus	0.00163	Comamonas denitrificans	0.001205	Sphingomonas sp. FARSPH	0.000924	Sphingomonas changbaiensis	0.000838	Sphingomonas paucimobilis	0.000745	Comamonas nitrativorans	0.000564
Monomicrobial	21M2015468	7224	0	17	Deinococcus geothermalis	0.615813	Effusibacillus pohliae	0.18221	Escherichia coli	0.070713	Ralstonia mannitolilytica	0.03814	Comamonas kerstersii	0.020323	Alcaligenes faecalis	0.016843	Pelomonas saccharophila	0.011136	Melaminivora alkalimesophila	0.009605	Finegoldia magna	0.007517	Atopostipes suicloacalis	0.00696	Moraxella osloensis	0.005429	Phreatobacter oligotrophus	0.003202
Monomicrobial	21M2015506	22659	59	19	Escherichia coli	0.490837	Deinococcus geothermalis	0.307764	Effusibacillus pohliae	0.100522	Ralstonia mannitolilytica	0.05887	Pelomonas saccharophila	0.010225	Phreatobacter oligotrophus	0.006374	Sphingomonas echinoides	0.004471	Sphingomonas sp. FARSPH	0.003762	Pseudomonas sp. SXM-1	0.002753	Bradyrhizobium guangzhouense	0.002479	Bradyrhizobium guangdongense	0.002479	Caulobacter henricii	0.002213
Polymicrobial	21M2011074	273194	10	247	Blautia luti	0.143937	Faecalibacterium prausnitzii	0.120938	Anaerostipes hadrus	0.063911	Anaerobutyricum hallii	0.054895	Christensenella massiliensis	0.047682	Ruminococcus bromii	0.040384	Christensenella sp. Marseille-P3954	0.03547	Gemmiger formicilis	0.034212	Blautia sp. SC05B48	0.031349	Blautia wexlerae	0.024451	Fusicatenibacter saccharivorans	0.023335	Ruminococcus champanellensis	0.017646
Monomicrobial	21M2011247	150850	4	2	Streptococcus dysgalactiae	0.99897	Laceyella sacchari	0.00103
Polymicrobial	21M2011287	235356	105	111	Granulicatella adiacens	0.151461	Streptococcus sp. LPB0220	0.112264	Streptococcus oralis	0.098961	Neisseria subflava	0.098905	Streptococcus mitis	0.085084	Streptococcus salivarius	0.07866	Gemella sanguinis	0.068202	Streptococcus viridans	0.036394	Staphylococcus aureus	0.033629	Abiotrophia defectiva	0.032582	Gemella haemolysans	0.028472	Streptococcus milleri	0.015294
Monomicrobial	21M2012078	671	0	45	Staphylococcus capitis	0.192528	Sphingomonas hankookensis	0.191836	Streptococcus salivarius	0.09127	Aquabacterium commune	0.080595	[Polyangium] brachysporum	0.058211	Thauera aromatica	0.037313	Gemella morbillorum	0.035821	Comamonas kerstersii	0.031343	Sphingomonas frigidaeris	0.025373	Methylobacterium goesingense	0.023881	Sphingomonas paucimobilis	0.023881	Cutibacterium acnes	0.014925
Polymicrobial	21M2015966	56902	0	7	Escherichia coli	0.488105	Streptococcus anginosus	0.356602	Clostridium perfringens	0.150862	Shigella flexneri	0.002819	Shigella dysenteriae	0.000778	Klebsiella pneumoniae	0.000458	Laceyella sacchari	0.000375
Monomicrobial	21M2015974	7942	9	29	Staphylococcus caprae	0.474199	Deinococcus geothermalis	0.218619	Deinococcus caeni	0.067638	Effusibacillus pohliae	0.057505	Sphingomonas hankookensis	0.03342	Ralstonia mannitolilytica	0.033186	Moraxella osloensis	0.021786	Pelomonas saccharophila	0.016593	Methylobacterium aquaticum	0.011692	Methylobacterium goesingense	0.011653	Sphingomonas paucimobilis	0.010766	Sphingomonas ginsenosidimutans	0.006586
Monomicrobial	21M2016160	23571	74	45	Streptococcus salivarius	0.434294	Streptococcus vestibularis	0.161758	Lactobacillus salivarius	0.127103	Deinococcus geothermalis	0.112573	Streptococcus sp. LPB0220	0.033393	Streptococcus oralis	0.027917	Ralstonia mannitolilytica	0.018102	Effusibacillus pohliae	0.012352	Streptococcus mitis	0.007393	Sphingomonas hankookensis	0.006298	Acidovorax temperans	0.004472	Enterobacter roggenkampii	0.004067
Monomicrobial	21M2016200	2857	304	17	Aquabacterium citratiphilum	0.38138	Deinococcus geothermalis	0.317398	Effusibacillus pohliae	0.082674	Listeria monocytogenes	0.054637	Ralstonia mannitolilytica	0.039899	Comamonas kerstersii	0.023005	Sphingomonas frigidaeris	0.020489	Staphylococcus capitis	0.0133	Acidovorax sp. KKS102	0.009705	Brevundimonas nasdae	0.009346	Methylorubrum extorquens	0.008627	Streptococcus sp. LPB0220	0.008627
Monomicrobial	21M2016228	109989	19	15	Escherichia coli	0.987032	Deinococcus geothermalis	0.006325	Comamonas kerstersii	0.003176	Melaminivora alkalimesophila	0.000992	Effusibacillus pohliae	0.000637	Ralstonia mannitolilytica	0.000528	Acinetobacter sp. SWBY1	0.000337	Streptococcus oralis	0.000209	Pseudomonas sp. phDV1	0.000127	Pantoea ananatis	0.000118	Pelomonas saccharophila	0.000118	Staphylococcus hominis	0.000109
Monomicrobial	21M2016226	58664	15	27	Campylobacter curvus	0.403972	Parvimonas micra	0.360818	Peptostreptococcus stomatis	0.092009	Fusobacterium varium	0.087707	Bacteroides thetaiotaomicron	0.018463	Citrobacter braakii	0.0086	Proteus vulgaris	0.007511	Odoribacter splanchnicus	0.005273	Sutterella wadsworthensis	0.003498	Paraeggerthella hongkongensis	0.002031	Morganella morganii	0.001672	Howardella ureilytica	0.001621
Polymicrobial	21M2015392	1244585	26	37	Fusobacterium varium	0.560617	Parvimonas micra	0.318467	Campylobacter curvus	0.074887	Peptostreptococcus stomatis	0.027682	Bacteroides thetaiotaomicron	0.006526	Odoribacter splanchnicus	0.004289	Sutterella wadsworthensis	0.002289	Laceyella sacchari	0.001084	Paraeggerthella hongkongensis	0.000943	Proteus vulgaris	0.000875	Citrobacter braakii	0.000587	Fusobacterium ulcerans	0.000284
Monomicrobial	21M2015710	6546	70	24	Deinococcus geothermalis	0.400123	Staphylococcus epidermidis	0.258546	Moraxella osloensis	0.110905	Aquabacterium citratiphilum	0.052136	Effusibacillus pohliae	0.041802	Variovorax paradoxus	0.017893	Methylobacterium goesingense	0.01635	Ralstonia mannitolilytica	0.014345	Staphylococcus hominis	0.01342	Streptococcus sanguinis	0.011877	Staphylococcus capitis	0.007998	Pseudomonas sp. SXM-1	0.006787
Monomicrobial	21M2015829	8817	25	37	Deinococcus geothermalis	0.391389	Effusibacillus pohliae	0.107188	Ralstonia mannitolilytica	0.098417	Staphylococcus hominis	0.076992	Mitsuaria chitosanitabida	0.064074	Cutibacterium acnes	0.039907	Pelomonas saccharophila	0.03662	Staphylococcus epidermidis	0.017314	Sphingomonas hankookensis	0.015521	Deinococcus radiodurans	0.013099	Janibacter indicus	0.010935	Sphingomonas adhaesiva	0.010137
Monomicrobial	21M2016958	95723	38	5	Staphylococcus epidermidis	0.535259	Burkholderia multivorans	0.394236	Stenotrophomonas maltophilia	0.042037	Stenotrophomonas sp. PAMC25021	0.028333	Laceyella sacchari	0.000135
Monomicrobial	21M2017379	59729	37	19	Streptococcus gordonii	0.98631	Staphylococcus hominis	0.001977	Streptococcus oralis	0.001843	Melaminivora alkalimesophila	0.001206	Sphingomonas echinoides	0.001156	Sediminibacterium magnilacihabitans	0.000972	Pseudomonas plecoglossicida	0.000905	Laceyella sacchari	0.000841	Atopostipes suicloacalis	0.000771	Nevskia soli	0.000603	Sphingomonas roseiflava	0.000591	Pelomonas saccharophila	0.00057
Monomicrobial	21M2016901	63384	278	18	[Eubacterium] brachy	0.405597	Fusobacterium nucleatum	0.330954	Parvimonas micra	0.123441	Filifactor alocis	0.113792	Streptococcus milleri	0.013177	Campylobacter rectus	0.006585	Pelomonas saccharophila	0.000995	Campylobacter showae	0.0009	Laceyella sacchari	0.000887	Staphylococcus epidermidis	0.000726	Cutibacterium acnes	0.000711	Pseudomonas oryzihabitans	0.000442
Monomicrobial	21M2017368	5841	3	1	Escherichia coli	1
Monomicrobial	21M2016293	958	637	18	Cutibacterium acnes	0.208768	Staphylococcus hominis	0.199374	Staphylococcus epidermidis	0.125261	Atopostipes suicloacalis	0.083507	Pelomonas saccharophila	0.074113	Alkalihalobacillus halodurans	0.063674	Finegoldia magna	0.058455	Ralstonia insidiosa	0.058455	Enterococcus cecorum	0.057411	Sediminibacterium magnilacihabitans	0.044885	Bradyrhizobium japonicum	0.006263	Methylobacterium aquaticum	0.005219
Monomicrobial	21M2017207	162022	0	2	Streptococcus dysgalactiae	0.999164	Laceyella sacchari	0.000836
Polymicrobial	21M2016075	82599	0	75	Parvimonas micra	0.68464	Peptostreptococcus stomatis	0.086067	Escherichia coli	0.039889	Dialister pneumosintes	0.035696	Fusobacterium nucleatum	0.030068	Dysosmobacter welbionis	0.022104	Porphyromonas endodontalis	0.019234	Gemella morbillorum	0.018124	Oscillibacter valericigenes	0.010827	Streptococcus milleri	0.005674	Alloprevotella tannerae	0.004985	Streptococcus constellatus	0.002436
Monomicrobial	21M2016054	2087	38	10	Streptococcus gordonii	0.786484	Comamonas kerstersii	0.082762	Acinetobacter sp. SWBY1	0.028404	Burkholderia stabilis	0.020568	[Brevibacterium] frigoritolerans	0.01763	Sphingomonas echinoides	0.016161	Staphylococcus epidermidis	0.015671	Sphingomonas sp. FARSPH	0.011753	Alkalihalobacillus halodurans	0.011263	Pelomonas saccharophila	0.009305
Polymicrobial	21M2017025	79747	116	166	Parvimonas micra	0.154805	Escherichia coli	0.121509	Faecalibacterium prausnitzii	0.095176	Peptostreptococcus stomatis	0.062387	Anaerotignum faecicola	0.04509	Dysosmobacter welbionis	0.044787	Bacteroides fragilis	0.030172	Streptococcus intermedius	0.020861	Oscillibacter valericigenes	0.018588	Christensenella massiliensis	0.018467	Fusicatenibacter saccharivorans	0.013956	Frisingicoccus caecimuris	0.013013
Monomicrobial	21M2017269	7856	122	24	Deinococcus radiodurans	0.396933	Klebsiella pneumoniae	0.221725	Methylobacterium goesingense	0.090607	Moraxella osloensis	0.05623	Deinococcus wulumuqiensis	0.038211	Massilia sp. WG5	0.023642	Achromobacter spanius	0.020575	Sphingomonas hankookensis	0.019553	Dermacoccus abyssi	0.016358	Staphylococcus hominis	0.015974	Paracoccus sanguinis	0.015752	Cutibacterium acnes	0.01278
Monomicrobial	21M2017304	15983	18	7	Escherichia coli	0.965953	Sediminibacterium magnilacihabitans	0.009576	Pelomonas saccharophila	0.005508	Cutibacterium acnes	0.005257	Staphylococcus epidermidis	0.004944	Staphylococcus hominis	0.004569	Moraxella osloensis	0.004193
Monomicrobial	21M2016756	11032	82	29	Pseudomonas oryzihabitans	0.257732	Paracoccus speluncae	0.210471	Pseudomonas fulva	0.201149	Acinetobacter radioresistens	0.075992	Paracoccus chinensis	0.056747	Acinetobacter indicus	0.027096	Staphylococcus capitis	0.024199	Paracoccus sanguinis	0.024085	Cutibacterium acnes	0.023173	Caulobacter henricii	0.01597	Pelomonas saccharophila	0.011039	Sphingosinicella sp. BN140058	0.010492
Monomicrobial	21M2017321	135955	50	11	Escherichia coli	0.997902	Moraxella osloensis	0.00064	Acinetobacter haemolyticus	0.000346	Qipengyuania sediminis	0.000287	Coprococcus eutactus	0.000162	Altererythrobacter ishigakiensis	0.000147	Staphylococcus hominis	0.00014	Cutibacterium acnes	0.000118	Sphingomonas echinoides	8.83e-05	Caulobacter henricii	8.83e-05	Sphingobium sp. PAMC28499	8.1e-05
Monomicrobial	21M2016813	2429	194	8	Delftia sp. Cs1-4	0.429766	Delftia acidovorans	0.240341	Staphylococcus aureus	0.233278	Filifactor alocis	0.037159	Chryseobacterium scophthalmum	0.024773	Pelomonas saccharophila	0.015277	Pararheinheimera aquatica	0.014038	Polynucleobacter acidiphobus	0.005367
Monomicrobial	21M2017887	141330	181	19	Pseudomonas aeruginosa	0.590007	Ochrobactrum intermedium	0.254042	Stenotrophomonas maltophilia	0.127699	Delftia tsuruhatensis	0.009781	Acinetobacter nosocomialis	0.009383	Achromobacter insolitus	0.003625	Mycoplasma salivarium	0.002626	Escherichia coli	0.000885	Enterobacter hormaechei	0.00046	Ochrobactrum ciceri	0.00031	Laceyella sacchari	0.000254	Cutibacterium acnes	0.000177
Monomicrobial	21M2017976	2340	63	16	Staphylococcus aureus	0.585708	Pelomonas saccharophila	0.102587	Cutibacterium acnes	0.085927	Melaminivora alkalimesophila	0.050416	Anaerococcus hydrogenalis	0.033319	Alloiococcus otitis	0.030688	Acetoanaerobium sticklandii	0.024112	Comamonas kerstersii	0.018851	Enterobacter hormaechei	0.018413	Peptoniphilus harei	0.01096	Staphylococcus auricularis	0.009645	Pseudomonas formosensis	0.006138
Monomicrobial	21M2017878	463	0	11	Stenotrophomonas maltophilia	0.464363	Cutibacterium acnes	0.231102	Escherichia coli	0.097192	Staphylococcus capitis	0.082073	Streptococcus salivarius	0.03464	Sediminibacterium magnilacihabitans	0.028078	Aciditerrimonas ferrireducens	0.015119	Alloiococcus otitis	0.015119	Streptococcus equinus	0.011838	Streptococcus sp. FDAARGOS_192	0.011838	Prevotella bivia	0.008639
Monomicrobial	21M2017892	140014	7	3	Streptococcus dysgalactiae	0.99848	Laceyella sacchari	0.000841	Massilia varians	0.000679
Monomicrobial	21M2017483	28250	291	42	Staphylococcus edaphicus	0.700502	Staphylococcus saprophyticus	0.120678	Cutibacterium acnes	0.032845	Streptococcus gordonii	0.016281	Acinetobacter sp. WCHAc010052	0.014246	Sphingomonas echinoides	0.008974	Staphylococcus epidermidis	0.008867	Moraxella osloensis	0.008832	Staphylococcus cohnii	0.007166	Serratia liquefaciens	0.007142	Sediminibacterium salmoneum	0.00603	Acinetobacter cumulans	0.0056
Monomicrobial	21M2017708	100451	367	10	Staphylococcus aureus	0.995714	Cutibacterium acnes	0.002351	Micrococcus luteus	0.000498	Megasphaera elsdenii	0.000319	Acidibacter ferrireducens	0.000249	Staphylococcus epidermidis	0.000219	Pelomonas saccharophila	0.000209	Staphylococcus capitis	0.000192	Aggregatibacter aphrophilus	0.000139	Staphylococcus hominis	0.00011
Polymicrobial	21M2017242	82554	103	9	Escherichia coli	0.849371	Streptococcus milleri	0.114728	Streptococcus constellatus	0.022434	Klebsiella pneumoniae	0.010977	Shigella flexneri	0.000964	Streptococcus anginosus	0.000854	Laceyella sacchari	0.000272	Enterobacter hormaechei	0.000209	Salmonella enterica	0.00019
Monomicrobial	21M2017484	8971	115	26	Enterococcus faecalis	0.623292	Acinetobacter dispersus	0.139044	Staphylococcus epidermidis	0.03617	Acinetobacter parvus	0.028527	Cutibacterium acnes	0.02374	Arboricoccus pini	0.019149	Moraxella osloensis	0.018589	Delftia acidovorans	0.014894	Amaricoccus kaplicensis	0.014446	Buttiauxella sp. 3AFRM03	0.012069	Pseudomonas oryzihabitans	0.011086	Buttiauxella izardii	0.008984
Monomicrobial	21M2017684	128032	37	3	Streptococcus agalactiae	0.999742	Acidovorax temperans	0.000164	Pelomonas saccharophila	9.38e-05
Polymicrobial	21M2018126	4142	24	19	Aquitalea sp. USM4	0.49614	Aquitalea sp. THG-DN7.12	0.276452	Pelomonas saccharophila	0.047537	Streptococcus anginosus	0.03014	Ewingella americana	0.023205	Serratia liquefaciens	0.018697	Pantoea sp. SO10	0.013477	Pseudomonas fragi	0.013232	Pseudomonas sp. MYb193	0.012007	Chromobacterium sp. ATCC 53434	0.01153	Acinetobacter cumulans	0.011027	Streptococcus gordonii	0.007841
Polymicrobial	21M2018340	86654	96	57	Parvimonas micra	0.36461	Peptostreptococcus stomatis	0.200706	Gemella morbillorum	0.090064	Dialister invisus	0.061368	Escherichia coli	0.052828	Fusobacterium nucleatum	0.049833	Solobacterium moorei	0.020333	Bacteroides fragilis	0.019663	Campylobacter curvus	0.018612	Streptococcus anginosus	0.016188	Pelomonas saccharophila	0.013001	Aquitalea sp. USM4	0.010132
Polymicrobial	21M2018081	122439	111	32	Escherichia coli	0.959562	Morganella morganii	0.011255	Streptococcus sp. LPB0220	0.006895	Prevotella veroralis	0.005529	Klebsiella pneumoniae	0.004272	Aquitalea sp. USM4	0.003665	Aquitalea sp. THG-DN7.12	0.001828	Pelomonas saccharophila	0.001161	Veillonella atypica	0.001046	Cutibacterium acnes	0.000531	Prevotella melaninogenica	0.000487	Staphylococcus capitis	0.000384
Monomicrobial	21M2018273	16942	15	18	Enterococcus faecalis	0.456625	Aquitalea sp. USM4	0.287234	Aquitalea sp. THG-DN7.12	0.129293	Pelomonas saccharophila	0.058653	Staphylococcus capitis	0.019228	Cutibacterium acnes	0.018015	Aerococcus urinaeequi	0.010023	Staphylococcus epidermidis	0.00558	Chromobacterium sp. ATCC 53434	0.004636	Aquitalea denitrificans	0.003219	Bradyrhizobium viridifuturi	0.001152	Bradyrhizobium mercantei	0.001152
Monomicrobial	21M2018358	96031	55	23	Staphylococcus epidermidis	0.948651	Aquitalea sp. USM4	0.02129	Aquitalea sp. THG-DN7.12	0.009622	Pelomonas saccharophila	0.008722	Staphylococcus aureus	0.00248	Staphylococcus capitis	0.002018	Aquitalea denitrificans	0.001212	Staphylococcus auricularis	0.001073	Cutibacterium acnes	0.000729	Massilia varians	0.000594	Sediminibacterium magnilacihabitans	0.000594	Alkalihalobacillus halodurans	0.000584
Monomicrobial	21M2018355	17535	86	28	Aquitalea sp. USM4	0.376474	Aquitalea sp. THG-DN7.12	0.191464	Staphylococcus aureus	0.183799	Pseudomonas sp. MYb193	0.075883	Pelomonas saccharophila	0.068585	Cutibacterium acnes	0.019792	Bradyrhizobium viridifuturi	0.010983	Bradyrhizobium mercantei	0.010983	Sphingomonas echinoides	0.009267	Acidibacter ferrireducens	0.008008	Caulobacter henricii	0.007729	Chromobacterium sp. ATCC 53434	0.005188
Polymicrobial	21M2018291	946	2	34	Pelomonas saccharophila	0.352003	Enterococcus faecalis	0.134249	Aquitalea sp. USM4	0.063046	Cutibacterium acnes	0.06234	Phenylobacterium haematophilum	0.061311	Sphingomonas echinoides	0.045455	Staphylococcus epidermidis	0.044398	Streptococcus mitis	0.039112	Paracoccus chinensis	0.024313	Mesorhizobium loti	0.022019	Acidibacter ferrireducens	0.020085	Aquitalea sp. THG-DN7.12	0.017179
Monomicrobial	21M2018106	26325	16	54	Pseudomonas aeruginosa	0.479594	Ochrobactrum intermedium	0.065599	Paracoccus sphaerophysae	0.064517	Aquitalea sp. USM4	0.049485	Pelomonas saccharophila	0.032506	Sphingomonas adhaesiva	0.025291	Aquitalea sp. THG-DN7.12	0.023707	Brevundimonas sp. GW460-12-10-14-LB2	0.02248	Aquincola tertiaricarbonis	0.022179	Brevundimonas nasdae	0.022135	Staphylococcus hominis	0.018902	Qipengyuania sediminis	0.018555
Polymicrobial	21M2018094	102576	18	94	Klebsiella pneumoniae	0.859528	Streptococcus anginosus	0.015116	Anaeroglobus geminatus	0.011348	Oscillibacter valericigenes	0.010318	Phascolarctobacterium faecium	0.009546	Escherichia coli	0.009279	Victivallales bacterium CCUG 44730	0.008281	Phocaeicola dorei	0.004873	[Eubacterium] infirmum	0.004784	Bacteroides salyersiae	0.004595	[Ruminococcus] gnavus	0.003983	Faecalibacterium prausnitzii	0.003974
Monomicrobial	21M2018164	25769	614	35	Aquitalea sp. USM4	0.273191	Staphylococcus epidermidis	0.139278	Aquitalea sp. THG-DN7.12	0.129906	Staphylococcus devriesei	0.099027	Escherichia coli	0.081134	Pelomonas saccharophila	0.081013	Staphylococcus auricularis	0.035147	Lactobacillus delbrueckii	0.02905	Staphylococcus cohnii	0.024976	Staphylococcus capitis	0.023537	Cutibacterium acnes	0.018719	Atopostipes suicloacalis	0.013593
Monomicrobial	21M2018699	15130	94	33	Staphylococcus epidermidis	0.380977	Aquitalea sp. USM4	0.178417	Moraxella osloensis	0.107565	Pelomonas saccharophila	0.105375	Aquitalea sp. THG-DN7.12	0.076912	Chryseobacterium sp. H6466	0.018447	Pseudomonas fluorescens	0.017285	Atopostipes suicloacalis	0.012143	Cutibacterium acnes	0.010086	Escherichia coli	0.008958	Sediminibacterium magnilacihabitans	0.007896	Pseudoxanthomonas spadix	0.007786
Monomicrobial	21M2018666	123353	45	50	Pseudomonas aeruginosa	0.948886	Aquitalea sp. USM4	0.009792	Brevundimonas nasdae	0.007697	Brevundimonas sp. GW460-12-10-14-LB2	0.005155	Aquitalea sp. THG-DN7.12	0.004487	Pelomonas saccharophila	0.003894	Massilia sp. WG5	0.003634	Pseudomonas fluorescens	0.002586	Staphylococcus haemolyticus	0.000884	Escherichia coli	0.000803	Staphylococcus aureus	0.000746	Cutibacterium acnes	0.000746
Polymicrobial	21M2018967	46142	10	42	Aquitalea sp. USM4	0.504407	Aquitalea sp. THG-DN7.12	0.232214	Pseudomonas aeruginosa	0.100357	Pseudomonas otitidis	0.05298	Moraxella osloensis	0.022159	Brevundimonas sp. GW460-12-10-14-LB2	0.011621	Escherichia coli	0.010418	Chromobacterium sp. ATCC 53434	0.009155	Klebsiella pneumoniae	0.008445	Pelomonas saccharophila	0.008348	Massilia sp. WG5	0.003541	Pseudomonas sp. MYb193	0.003299
Monomicrobial	21M2018778	690	1	15	Pseudomonas aeruginosa	0.870492	Pelomonas saccharophila	0.040757	Aquitalea sp. USM4	0.020036	Brevundimonas nasdae	0.014587	Escherichia coli	0.011645	Aquitalea sp. THG-DN7.12	0.010532	Pseudomonas fluorescens	0.008692	Massilia sp. WG5	0.007278	Acidibacter ferrireducens	0.002911	Phenylobacterium haematophilum	0.002911	Microbacterium hominis	0.002911	Brevundimonas sp. GW460-12-10-14-LB2	0.002881
Polymicrobial	21M2018826	113468	1	78	Escherichia coli	0.864008	Faecalibacterium prausnitzii	0.075864	Gemmiger formicilis	0.007107	Bacteroides fragilis	0.005433	Ruminococcus bromii	0.005359	Streptococcus intermedius	0.004609	Oscillibacter valericigenes	0.003953	Phocaeicola dorei	0.003546	Shigella flexneri	0.002078	Lachnospiraceae bacterium GAM79	0.001889	Phocaeicola vulgatus	0.001783	Lachnospira eligens	0.001774
Monomicrobial	21M2018588	54857	0	1	Acinetobacter baumannii	1
Polymicrobial	21M2018565	89561	2	117	Dysosmobacter welbionis	0.211199	Phascolarctobacterium faecium	0.190327	Comamonas kerstersii	0.155091	Oscillibacter valericigenes	0.085521	Intestinimonas butyriciproducens	0.038593	Alistipes onderdonkii	0.025402	Bacteroides thetaiotaomicron	0.020944	Eisenbergiella massiliensis	0.020389	Parabacteroides gordonii	0.017083	Papillibacter cinnamivorans	0.016145	Anaerotignum faecicola	0.013993	Cloacibacillus evryensis	0.013673
Polymicrobial	21M2018371	77586	20	82	Parvimonas micra	0.521228	Gemella morbillorum	0.067645	[Eubacterium] brachy	0.05076	Escherichia coli	0.040825	Alloprevotella tannerae	0.036523	Dialister pneumosintes	0.033626	Mogibacterium timidum	0.03341	Bacteroides fragilis	0.026454	Fusobacterium nucleatum	0.021469	Solobacterium moorei	0.020147	Phascolarctobacterium succinatutens	0.018197	Streptococcus milleri	0.016899
None	21M2019392	722	116	30	Pelomonas saccharophila	0.308864	Finegoldia magna	0.15374	Acidibacter ferrireducens	0.119114	Aquitalea sp. USM4	0.066451	Sphingomonas echinoides	0.052632	Pseudomonas fluorescens	0.049861	Staphylococcus hominis	0.027701	Enterococcus faecium	0.023546	Paracoccus marinus	0.022161	Brevundimonas nasdae	0.020189	Aquitalea sp. THG-DN7.12	0.019597	Thermoanaerobaculum aquaticum	0.019399
None	21M2019256	3082	78	14	Pelomonas saccharophila	0.604385	Moraxella osloensis	0.104712	Atopostipes suicloacalis	0.074935	Sphingomonas echinoides	0.049084	Sediminibacterium magnilacihabitans	0.043194	Rhizobium cellulosilyticum	0.032723	Cutibacterium granulosum	0.022906	Acidibacter ferrireducens	0.017016	Tardiphaga robiniae	0.016241	Bradyrhizobium guangdongense	0.008405	Bradyrhizobium guangzhouense	0.008077	Micrococcus sp. KBS0714	0.007199
Polymicrobial	21M2019039	53707	13	125	Fusobacterium varium	0.20596	Frisingicoccus caecimuris	0.118369	Oscillibacter valericigenes	0.06323	[Ruminococcus] gnavus	0.053677	Escherichia coli	0.046581	Phocaeicola vulgatus	0.043474	Faecalibacterium prausnitzii	0.03731	Ruthenibacterium lactatiformans	0.032551	Butyricimonas phoceensis	0.030004	Phascolarctobacterium faecium	0.023619	Bacteroides uniformis	0.021492	Tyzzerella nexilis	0.017532
Monomicrobial	21M2019447	35311	175	4	Staphylococcus aureus	0.998045	Enterococcus faecium	0.000907	[Brevibacterium] frigoritolerans	0.000567	Pelomonas saccharophila	0.000482
Polymicrobial	21M2019157	21160	164	58	Escherichia coli	0.223457	Gemella morbillorum	0.2101	Parvimonas micra	0.091662	Porphyromonas endodontalis	0.080888	Campylobacter concisus	0.057128	Fusobacterium nucleatum	0.035356	Prevotella oris	0.023145	Aminipila sp. JN-18	0.019428	Enterocloster bolteae	0.019311	Veillonella parvula	0.018648	Faecalibacterium prausnitzii	0.017749	Butyricicoccus faecihominis	0.015788
Monomicrobial	21M2017996	1355	869	18	Tardiphaga robiniae	0.168792	Brevundimonas sp. GW460-12-10-14-LB2	0.10394	Sphingomonas echinoides	0.102776	Deinococcus aetherius	0.099775	Bradyrhizobium viridifuturi	0.065641	Bradyrhizobium mercantei	0.065641	Sediminibacterium salmoneum	0.064516	Sediminibacterium magnilacihabitans	0.061515	Pelomonas saccharophila	0.060015	Sphingomonas paucimobilis	0.036759	Mageeibacillus indolicus	0.029257	Acidibacter ferrireducens	0.027007
Polymicrobial	21M2019211	19953	0	95	Porphyromonas endodontalis	0.398058	Culturomica massiliensis	0.059536	Faecalibacterium prausnitzii	0.057988	Enterococcus gilvus	0.056935	Oscillibacter valericigenes	0.029386	Dysosmobacter welbionis	0.02186	Christensenella minuta	0.020271	Ihubacter massiliensis	0.019253	Ruthenibacterium lactatiformans	0.018813	Christensenella sp. Marseille-P3954	0.018018	Dorea longicatena	0.016408	Bacteroides thetaiotaomicron	0.016251
Polymicrobial	21M2019405	106425	270	7	Streptococcus dysgalactiae	0.584188	Morganella morganii	0.325187	Proteus mirabilis	0.089526	Laceyella sacchari	0.000629	Enterobacter hormaechei	0.000207	Cutibacterium acnes	0.00016	Acidibacter ferrireducens	0.000103
Polymicrobial	21M2019210	61854	0	53	Parvimonas micra	0.31422	Prevotella oris	0.150987	Porphyromonas endodontalis	0.133761	Peptostreptococcus stomatis	0.118192	Prevotella dentalis	0.096859	Dialister pneumosintes	0.044789	Lachnoclostridium sp. YL32	0.026636	Lancefieldella rimae	0.025121	Prevotella dentasini	0.011531	Mogibacterium timidum	0.009198	Prevotella nigrescens	0.005829	Enterocloster citroniae	0.005342
None	21M2019552	1755	199	16	Acinetobacter johnsonii	0.464877	Sphingobacterium nematocida	0.113078	Fusobacterium periodonticum	0.070817	Sphingomonas sp. FARSPH	0.060537	Sphingomonas echinoides	0.054255	Stenotrophomonas nitritireducens	0.03502	Stenotrophomonas sp. KCTC 12332	0.034083	Pseudomonas balearica	0.033124	Lactobacillus delbrueckii	0.029126	Cutibacterium acnes	0.021702	Pelomonas saccharophila	0.018275	Moraxella osloensis	0.017704
None	21M2019523	196	1335	14	Sediminibacterium magnilacihabitans	0.321429	Pelomonas saccharophila	0.193878	Streptococcus mitis	0.142857	Caulobacter henricii	0.122162	Sediminibacterium salmoneum	0.066327	Sphingomonas echinoides	0.05102	Escherichia coli	0.045918	Laceyella sacchari	0.015274	Caulobacter segnis	0.010491	Haemophilus sputorum	0.010204	Caulobacter vibrioides	0.005127	Caulobacter mirabilis	0.005109
Monomicrobial	21M2019662	108104	755	32	Enterococcus faecalis	0.961043	Prevotella dentalis	0.006692	Porphyromonas endodontalis	0.00487	Comamonas kerstersii	0.003416	Peptostreptococcus stomatis	0.003351	Lancefieldella rimae	0.003324	Dialister invisus	0.003268	Pelomonas saccharophila	0.002787	Labilithrix luteola	0.001555	Parvimonas micra	0.001268	Prevotella oris	0.001198	Cutibacterium acnes	0.001176
Monomicrobial	21M2019620	9033	5	28	Prevotella oris	0.170854	Prevotella dentalis	0.116781	Staphylococcus epidermidis	0.097276	Moraxella osloensis	0.08531	Bacillus cereus	0.075482	Parvimonas micra	0.073282	Leuconostoc citreum	0.063816	Sphingomonas echinoides	0.049337	Porphyromonas endodontalis	0.040873	Dialister pneumosintes	0.040762	Solobacterium moorei	0.038534	Lancefieldella rimae	0.02517
Polymicrobial	21M2019516	296940	48	29	Finegoldia magna	0.31412	Prevotella bivia	0.171864	Peptoniphilus coxii	0.162211	Anaerococcus obesiensis	0.14086	Peptoniphilus harei	0.06137	Dialister propionicifaciens	0.053829	Dialister invisus	0.041363	Peptoniphilus lacrimalis	0.019146	Anaerococcus vaginalis	0.008385	Dialister micraerophilus	0.008205	Anaerococcus murdochii	0.004313	Peptoniphilus grossensis	0.003801
Monomicrobial	21M2019579	29457	454	16	Burkholderia pseudomallei	0.970233	Comamonas kerstersii	0.005849	Pelomonas saccharophila	0.005781	Synechococcus sp. CB0101	0.004387	Brevundimonas nasdae	0.002314	Delftia sp. Cs1-4	0.002202	Melaminivora alkalimesophila	0.001598	Sphingomonas echinoides	0.001564	Burkholderia mallei	0.001507	Delftia acidovorans	0.001165	Xanthomonas campestris	0.000986	Oceanobacillus luteolus	0.000646
Monomicrobial	21M2019495	1638	3	8	Bacillus cereus	0.710376	Bacillus thuringiensis	0.196149	Brevundimonas nasdae	0.023212	Massilia timonae	0.022585	Aquitalea sp. USM4	0.016311	Alkalihalobacillus halodurans	0.013802	Moraxella osloensis	0.011292	Staphylococcus epidermidis	0.006274
None	21M2019465	333	825	11	Cutibacterium acnes	0.481928	Staphylococcus hominis	0.189759	Paracoccus chinensis	0.180723	Pelomonas saccharophila	0.081325	Sphingomonas echinoides	0.027108	Sediminibacterium magnilacihabitans	0.01506	Sorangium cellulosum	0.009036	Sporichthya polymorpha	0.006024	Paracoccus sanguinis	0.003012	Laceyella sacchari	0.003012	Pseudomonas mendocina	0.003012
None	21M2019576	13442	1009	18	Escherichia coli	0.714552	Moraxella osloensis	0.151479	Pelomonas saccharophila	0.042471	Kocuria rhizophila	0.013933	Streptococcus thermophilus	0.011698	Cutibacterium acnes	0.010506	Roseomonas mucosa	0.010208	Pseudomonas fluorescens	0.010133	Dermacoccus nishinomiyaensis	0.00991	Acinetobacter johnsonii	0.007004	Sediminibacterium salmoneum	0.005067	Tardiphaga robiniae	0.002608
Monomicrobial	21M2019840	47199	395	16	Klebsiella pneumoniae	0.649675	Haemophilus influenzae	0.150978	Parvimonas micra	0.08879	Veillonella parvula	0.057716	Fusobacterium nucleatum	0.019967	Peptostreptococcus stomatis	0.011446	Bacteroides heparinolyticus	0.010132	Campylobacter concisus	0.003285	Pelomonas saccharophila	0.002183	Cutibacterium acnes	0.00178	Aquitalea sp. USM4	0.001206	Aquitalea sp. THG-DN7.12	0.000765
Monomicrobial	21M2020008	147483	2865	16	Staphylococcus aureus	0.98356	Methylobacterium goesingense	0.002719	Sediminibacterium magnilacihabitans	0.002034	Sphingomonas echinoides	0.001919	Streptococcus mitis	0.001751	Burkholderia cenocepacia	0.001653	Acinetobacter schindleri	0.001397	Burkholderia cepacia	0.001366	Pelomonas saccharophila	0.00116	Megasphaera elsdenii	0.001017	Staphylococcus capitis	0.00068	Bradyrhizobium guangdongense	0.000271
Monomicrobial	21M2019761	37074	28	10	Enterococcus faecalis	0.980364	Sediminibacterium magnilacihabitans	0.00561	Acinetobacter johnsonii	0.003857	Pelomonas saccharophila	0.003183	Labilithrix luteola	0.002212	Brevundimonas nasdae	0.001205	Acidibacter ferrireducens	0.001187	Cutibacterium acnes	0.000971	Acinetobacter lwoffii	0.00089	Brevundimonas sp. GW460-12-10-14-LB2	0.000521
Monomicrobial	21M2020019	12678	1207	17	Enterococcus faecalis	0.750572	Klebsiella oxytoca	0.049596	Pelomonas saccharophila	0.038744	Klebsiella sp. FDAARGOS_511	0.027181	Acinetobacter lwoffii	0.026908	Sphingomonas echinoides	0.020832	Peptoniphilus harei	0.016097	Sediminibacterium magnilacihabitans	0.01586	Erythrobacter flavus	0.01586	Sediminibacterium salmoneum	0.013967	Cutibacterium acnes	0.009785	Sphingomonas colocasiae	0.005366
Monomicrobial	21M2020108	2907	1042	12	Enterobacter hormaechei	0.243278	Sorangium cellulosum	0.187262	Alkalihalobacillus halodurans	0.164763	Streptococcus oralis	0.130155	Enterococcus faecium	0.093112	Enterobacter cloacae	0.061672	Brevundimonas lenta	0.058386	Acinetobacter johnsonii	0.029422	Streptococcus mitis	0.01223	Streptococcus sp. 1643	0.010956	Brevundimonas sp. M20	0.004957	Cutibacterium acnes	0.003808
Monomicrobial	21M2020167	35922	3002	21	Stenotrophomonas maltophilia	0.673134	Pseudomonas aeruginosa	0.219472	Enterobacter roggenkampii	0.026563	Enterobacter asburiae	0.018949	Enterococcus faecium	0.013126	Pelomonas saccharophila	0.010033	Haemophilus parainfluenzae	0.009615	Stenotrophomonas pavanii	0.006667	Methylobacterium goesingense	0.004738	Burkholderia stabilis	0.004494	Bradyrhizobium viridifuturi	0.002508	Bradyrhizobium mercantei	0.002508
Monomicrobial	21M2020672	36648	0	2	Stenotrophomonas maltophilia	0.998499	Paracoccus yeei	0.001501
Polymicrobial	21M2020881	131286	223	72	Escherichia coli	0.412848	Streptococcus intermedius	0.345531	Porphyromonas endodontalis	0.031904	Campylobacter showae	0.031347	Aggregatibacter segnis	0.031239	Dysosmobacter welbionis	0.026404	Streptococcus constellatus	0.018676	Streptococcus anginosus	0.016971	Streptococcus milleri	0.011121	Oscillibacter valericigenes	0.010505	Eisenbergiella massiliensis	0.006835	Extibacter muris	0.005426
Polymicrobial	21M2020959	282864	231	16	Klebsiella pneumoniae	0.501176	Streptococcus sp. FDAARGOS_192	0.36796	Streptococcus vestibularis	0.120713	Streptococcus salivarius	0.007083	Enterococcus faecium	0.001217	Veillonella dispar	0.000492	Laceyella sacchari	0.000413	Staphylococcus capitis	0.000329	Moraxella osloensis	0.000145	Staphylococcus epidermidis	0.000113	Streptococcus mitis	7.48e-05	[Propionibacterium] namnetense	7.43e-05
Monomicrobial	21M2020722	257727	12	2	Escherichia coli	0.999953	Staphylococcus capitis	4.66e-05
Monomicrobial	21M2021033	269406	438	8	Pseudomonas aeruginosa	0.999359	Cutibacterium acnes	0.000241	Pelomonas saccharophila	0.000123	Staphylococcus epidermidis	7.42e-05	Chroococcidiopsis thermalis	5.94e-05	Moraxella osloensis	5.57e-05	Pseudoxanthomonas japonensis	4.45e-05	Laceyella sacchari	4.34e-05
Monomicrobial	21M2021008	10529	3192	31	Acinetobacter johnsonii	0.36355	Escherichia coli	0.087041	Lactobacillus crispatus	0.067892	Streptococcus sp. LPB0220	0.057513	Pelomonas saccharophila	0.049514	Paracoccus sanguinis	0.042849	Pseudomonas fluorescens	0.0406	Comamonas aquatica	0.036374	Tumebacillus ginsengisoli	0.036184	Moraxella osloensis	0.030851	Lysobacter helvus	0.026376	Cutibacterium acnes	0.026311
Monomicrobial	21M2020506	107024	2873	16	Streptococcus sp. FDAARGOS_522	0.470711	Streptococcus agalactiae	0.450477	Streptococcus sp. FDAARGOS_520	0.073223	Staphylococcus hominis	0.001346	Pelomonas saccharophila	0.001252	Paracoccus chinensis	0.000486	Streptococcus thermophilus	0.000486	Massilia oculi	0.000411	Bacillus licheniformis	0.000365	Salinicoccus roseus	0.000262	Cutibacterium acnes	0.000234	Streptococcus mitis	0.000206
Monomicrobial	21M2020378	3037	1187	8	Streptococcus thermophilus	0.560596	Chiayiivirga flava	0.199669	Pseudomonas sp. BJP69	0.107133	Pseudomonas putida	0.041874	Enterococcus faecium	0.041722	Brevundimonas sp. GW460-12-10-14-LB2	0.0278	Brevundimonas nasdae	0.014915	Cutibacterium acnes	0.006291
Monomicrobial	21M2020403	2923	5	14	Pelomonas saccharophila	0.294933	Moraxella osloensis	0.255422	Staphylococcus epidermidis	0.111839	Pseudomonas aeruginosa	0.09673	Streptococcus australis	0.084682	Cutibacterium acnes	0.047507	Dermacoccus nishinomiyaensis	0.039587	Aquitalea sp. USM4	0.032719	Aquitalea sp. THG-DN7.12	0.011343	Staphylococcus capitis	0.008988	Dermacoccus abyssi	0.004475	Paracoccus marinus	0.004131
Polymicrobial	21M2020302	272451	115	107	Parvimonas micra	0.238715	Peptostreptococcus stomatis	0.120598	Gemella morbillorum	0.083685	Comamonas kerstersii	0.082241	Faecalibacterium prausnitzii	0.065168	Fusobacterium nucleatum	0.04568	Aggregatibacter segnis	0.039369	Dysosmobacter welbionis	0.030839	Dialister pneumosintes	0.029204	Bacteroides fragilis	0.028993	Prevotella intermedia	0.025711	Porphyromonas endodontalis	0.025553
Monomicrobial	21M2021728	193450	13	11	Enterococcus faecalis	0.696725	Enterococcus faecium	0.291568	Acinetobacter sp. SWBY1	0.004446	Comamonas kerstersii	0.00244	Pelomonas saccharophila	0.001882	Staphylococcus capitis	0.001597	Cutibacterium acnes	0.000631	Bradyrhizobium viridifuturi	0.000274	Bradyrhizobium mercantei	0.000274	Laceyella sacchari	9.71e-05	Acinetobacter seohaensis	6.71e-05
Monomicrobial	21M2022073	500223	122	22	Enterococcus faecalis	0.979743	Enterococcus faecium	0.011107	Comamonas kerstersii	0.005	Pelomonas saccharophila	0.000626	Melaminivora alkalimesophila	0.000618	Paenibacillus periandrae	0.000496	Acinetobacter sp. SWBY1	0.000328	Atopostipes suicloacalis	0.000309	Pseudomonas formosensis	0.00029	Comamonas denitrificans	0.000264	Chryseobacterium haifense	0.000208	Schlegelella aquatica	0.000152
Monomicrobial	21M2022253	48595	473	11	Enterococcus faecium	0.885022	Comamonas kerstersii	0.06443	Melaminivora alkalimesophila	0.025105	Pelomonas saccharophila	0.008417	Paracoccus chinensis	0.005001	Bradyrhizobium viridifuturi	0.003323	Bradyrhizobium mercantei	0.003323	Brevundimonas nasdae	0.002254	Brevundimonas sp. GW460-12-10-14-LB2	0.001553	Cutibacterium acnes	0.001296	Laceyella sacchari	0.000275
Monomicrobial	21M2021772	43809	50	14	Enterococcus faecium	0.687169	Pseudomonas aeruginosa	0.230642	Comamonas kerstersii	0.03313	Acinetobacter sp. SWBY1	0.016987	Pseudoxanthomonas taiwanensis	0.009453	Pelomonas saccharophila	0.00806	Paracoccus chinensis	0.004932	Melaminivora alkalimesophila	0.004681	Sphingomonas hunanensis	0.001073	Schlegelella aquatica	0.00105	Tardiphaga robiniae	0.000845	Bradyrhizobium viridifuturi	0.000811
Polymicrobial	21M2021206	42932	17	49	Helicobacter pylori	0.724081	Streptococcus sp. LPB0220	0.072465	Streptococcus mitis	0.053284	Streptococcus sp. FDAARGOS_192	0.035663	Streptococcus oralis	0.022815	Streptococcus parasanguinis	0.01518	Streptococcus salivarius	0.011306	Gemella haemolysans	0.009594	Veillonella atypica	0.009237	Veillonella dispar	0.007011	Streptococcus sp. oral taxon 431	0.004424	Granulicatella adiacens	0.004263
Polymicrobial	21M2021721	340093	153	105	Parvimonas micra	0.229186	Peptostreptococcus stomatis	0.183591	Porphyromonas gingivalis	0.150403	Gemella morbillorum	0.124834	Fusobacterium nucleatum	0.084503	Dysosmobacter welbionis	0.070906	Escherichia coli	0.052362	[Eubacterium] nodatum	0.022742	Bacteroides fragilis	0.008255	Campylobacter rectus	0.005567	Oscillibacter valericigenes	0.004424	Eikenella corrodens	0.002994
Monomicrobial	21M2021332	101381	152	10	Enterococcus faecalis	0.670992	Enterococcus faecium	0.324159	Staphylococcus warneri	0.002107	Melaminivora alkalimesophila	0.000661	Paracoccus marinus	0.000533	Staphylococcus pasteuri	0.000527	Bradyrhizobium mercantei	0.000311	Bradyrhizobium viridifuturi	0.000311	Acinetobacter johnsonii	0.000276	Laceyella sacchari	0.000124
Monomicrobial	22M2100221	200019	0	1	Enterococcus faecalis	1
Polymicrobial	22M2100172	253606	798	114	Aggregatibacter segnis	0.327229	Campylobacter showae	0.222072	Pseudoramibacter alactolyticus	0.054895	Peptostreptococcus stomatis	0.044994	Parvimonas micra	0.040785	Gemella morbillorum	0.039273	Pyramidobacter piscolens	0.036194	Porphyromonas gingivalis	0.029592	Ihubacter massiliensis	0.027979	Dysosmobacter welbionis	0.024628	Bacteroides fragilis	0.021077	Streptococcus milleri	0.018767
Monomicrobial	22M2100189	11474	25	18	Cutibacterium acnes	0.449476	Staphylococcus epidermidis	0.135789	Staphylococcus capitis	0.129307	Corynebacterium tuscaniense	0.045463	Corynebacterium ureicelerivorans	0.040772	Aliterella antarctica	0.033595	Corynebacterium pilbarense	0.033074	Finegoldia magna	0.026876	Staphylococcus lugdunensis	0.024869	Bradyrhizobium mercantei	0.022382	Bradyrhizobium viridifuturi	0.022382	Corynebacterium tuberculostearicum	0.010471
Monomicrobial	22M2100166	356	6	7	Acinetobacter septicus	0.676282	Variovorax paradoxus	0.289326	Pseudomonas azotoformans	0.014045	Acinetobacter ursingii	0.009111	Laceyella sacchari	0.005618	Corynebacterium tuberculostearicum	0.002809	Cutibacterium acnes	0.002809
Monomicrobial	22M2000452	8347	4	15	Campylobacter jejuni	0.740723	Comamonas kerstersii	0.096914	Melaminivora alkalimesophila	0.042993	Comamonas denitrificans	0.030718	Pseudoxanthomonas taiwanensis	0.021136	Aquincola tertiaricarbonis	0.018734	Pseudomonas sp. phDV1	0.010953	Snodgrassella alvi	0.010808	Comamonas nitrativorans	0.007591	Acinetobacter baumannii	0.005044	Bradyrhizobium viridifuturi	0.003543	Bradyrhizobium mercantei	0.003543
Polymicrobial	22M2100180	127539	123	58	Peptostreptococcus stomatis	0.465987	Gemella morbillorum	0.232731	Escherichia coli	0.047068	Pyramidobacter piscolens	0.041995	Filifactor alocis	0.037984	Streptococcus intermedius	0.02856	Odoribacter splanchnicus	0.026624	Phascolarctobacterium succinatutens	0.02242	Bacteroides fragilis	0.018356	Porphyromonas gingivalis	0.017683	Fusobacterium nucleatum	0.00619	Ihubacter massiliensis	0.005737
Monomicrobial	22M2100137	194783	141	5	Escherichia coli	0.999401	Pelomonas saccharophila	0.000359	Escherichia fergusonii	8.53e-05	Bacillus thermozeamaize	7.7e-05	Cupriavidus metallidurans	7.7e-05
Monomicrobial	22M2100085	146478	50	1	Staphylococcus aureus	1
Monomicrobial	22M2100052	233911	196	4	Streptococcus sanguinis	0.999158	Laceyella sacchari	0.000726	Mitsuaria sp. 7	6.84e-05	Microbacterium saccharophilum	4.7e-05
Polymicrobial	22M2000213	262699	290	38	Staphylococcus aureus	0.898454	Pseudoglutamicibacter cumminsii	0.037876	Corynebacterium jeikeium	0.018222	Enterococcus faecalis	0.015003	Brevibacterium ravenspurgense	0.012686	Helcobacillus massiliensis	0.006015	Staphylococcus haemolyticus	0.003255	Comamonas kerstersii	0.001036	Corynebacterium aurimucosum	0.000929	Moraxella osloensis	0.000872	Corynebacterium tuberculostearicum	0.000723	Finegoldia magna	0.000647
Polymicrobial	22M2100020	42473	678	14	Pseudomonas aeruginosa	0.82849	Moraxella osloensis	0.105664	Schlegelella aquatica	0.014912	Arboricoccus pini	0.009892	Escherichia coli	0.008104	Agrobacterium tumefaciens	0.00801	Staphylococcus epidermidis	0.007284	Cutibacterium acnes	0.00596	Cloacibacterium normanense	0.004099	Paracoccus marinus	0.002709	Paracoccus sanguinis	0.002568	Geminicoccus roseus	0.001345
Polymicrobial	22M2100022	168133	56	47	Haemophilus sputorum	0.359006	Fusobacterium varium	0.205219	Bacteroides fragilis	0.173679	Streptococcus oralis	0.063423	Phascolarctobacterium faecium	0.055122	Gemella sanguinis	0.039937	Anaerotignum faecicola	0.030735	Dorea longicatena	0.014788	Ruthenibacterium lactatiformans	0.008436	Dorea formicigenerans	0.005895	Campylobacter concisus	0.004123	Streptococcus australis	0.003859
Monomicrobial	22M2100011	165954	125	3	Streptococcus dysgalactiae	0.999096	Laceyella sacchari	0.000753	Delftia acidovorans	0.000151
Polymicrobial	22M2100023	91446	34	192	Faecalibacterium prausnitzii	0.139167	Oscillibacter valericigenes	0.10388	Phascolarctobacterium faecium	0.090738	Escherichia coli	0.06424	Dysosmobacter welbionis	0.060829	Anaerotignum faecicola	0.055626	Eubacterium limosum	0.035238	Christensenella massiliensis	0.030026	Odoribacter splanchnicus	0.02574	Pseudomonas aeruginosa	0.018815	[Ruminococcus] faecis	0.017387	Extibacter muris	0.016592
Monomicrobial	22M2100035	7696	26	10	Pseudomonas aeruginosa	0.850397	Pelomonas saccharophila	0.053077	Achromobacter spanius	0.045271	Citrobacter freundii complex sp. CFNIH3	0.025758	Pseudomonas oleovorans	0.009757	Brevundimonas nasdae	0.007039	Brevundimonas sp. GW460-12-10-14-LB2	0.003155	Brevundimonas sp. SGAir0440	0.002035	Bradyrhizobium mercantei	0.001756	Bradyrhizobium viridifuturi	0.001756
Polymicrobial	22M2100951	308801	24	5	Escherichia coli	0.995101	Enterococcus faecalis	0.004677	Shigella sonnei	0.000125	Shigella flexneri	4.88e-05	Laceyella sacchari	4.8e-05
Monomicrobial	22M2100886	6891	52	6	Staphylococcus epidermidis	0.974862	Schlegelella aquatica	0.010462	Delftia tsuruhatensis	0.004505	Aliterella antarctica	0.004413	Gloeocapsa sp. PCC 7428	0.003315	Tychonema bourrellyi	0.002443
Monomicrobial	22M2100935	3381	1	22	Escherichia coli	0.285545	Proteus mirabilis	0.174467	Pseudomonas putida	0.122927	Halomonas muralis	0.050059	Salmonella enterica	0.047097	Staphylococcus pseudintermedius	0.039692	Acinetobacter baumannii	0.039396	Acinetobacter junii	0.034953	Acinetobacter soli	0.028732	Bacillus thuringiensis	0.024921	Schlegelella aquatica	0.0234	Moraxella osloensis	0.023104
Monomicrobial	22M2100873	63083	5038	13	Staphylococcus haemolyticus	0.96842	Pelomonas saccharophila	0.011545	Staphylococcus xylosus	0.005868	Kocuria indica	0.004885	Cutibacterium acnes	0.003156	Delftia tsuruhatensis	0.002252	Schlegelella aquatica	0.000936	Paenibacillus thailandensis	0.000698	Populibacterium corticicola	0.000698	Laceyella sacchari	0.000639	Aliterella antarctica	0.000436	Pseudoxanthomonas taiwanensis	0.000238
Monomicrobial	22M2100945	8265	10122	9	Streptococcus sanguinis	0.916296	Microbacterium testaceum	0.031054	Janthinobacterium sp. SNU WT3	0.01539	Microbacterium sp. BH-3-3-3	0.007725	Methylobacterium goesingense	0.006907	Cutibacterium acnes	0.006907	Sphingomonas sp. PAMC26645	0.005817	Laceyella sacchari	0.005178	Sphingomonas panni	0.004726
Polymicrobial	22M2101036	147117	197	87	Parvimonas micra	0.601411	[Eubacterium] brachy	0.068124	Dialister pneumosintes	0.032261	Mogibacterium timidum	0.031714	Oscillibacter valericigenes	0.028877	Dysosmobacter welbionis	0.027994	Mycoplasma salivarium	0.025329	Fusobacterium mortiferum	0.025069	Aminipila sp. JN-18	0.022276	Bulleidia extructa	0.018903	Porphyromonas endodontalis	0.016995	[Eubacterium] minutum	0.011213
Monomicrobial	22M2101085	142562	5017	5	Streptococcus dysgalactiae	0.998567	Laceyella sacchari	0.001076	Massilia violaceinigra	0.000168	Janthinobacterium sp. SNU WT3	0.000119	Escherichia coli	7.02e-05
Monomicrobial	22M2100918	324	32	13	Enterococcus faecalis	0.719136	Janthinobacterium svalbardensis	0.061894	Janthinobacterium sp. SNU WT3	0.049217	Abiotrophia defectiva	0.037037	Alkanindiges illinoisensis	0.033951	Methylobacterium aquaticum	0.030864	Moraxella osloensis	0.018519	Ralstonia pickettii	0.015432	Sphingomonas phyllosphaerae	0.012346	Sphingomonas paucimobilis	0.009259	Cutibacterium acnes	0.006173	Paracoccus sanguinis	0.003086
Polymicrobial	22M2101062	168869	273	33	Klebsiella variicola	0.845187	Klebsiella pneumoniae	0.082076	Veillonella parvula	0.023697	Haemophilus parainfluenzae	0.014772	Streptococcus gordonii	0.007114	Granulicatella adiacens	0.005606	Haemophilus haemolyticus	0.00406	Veillonella dispar	0.003267	Campylobacter concisus	0.002772	Streptococcus parasanguinis	0.002573	Haemophilus sp. oral taxon 036	0.001447	Streptococcus sp. LPB0220	0.001419
Monomicrobial	22M2100924	62	19	3	Comamonas jiangduensis	0.467742	Pseudomonas aeruginosa	0.451613	Leuconostoc mesenteroides	0.080645
Polymicrobial	22M2100895	136557	240	19	Parvimonas micra	0.450536	Bacteroides fragilis	0.221316	Peptostreptococcus anaerobius	0.187459	Fusobacterium nucleatum	0.05546	Escherichia coli	0.030176	Dialister micraerophilus	0.023346	Peptoniphilus harei	0.02006	Bacteroides ovatus	0.005704	Eggerthella lenta	0.001809	Laceyella sacchari	0.001208	Erysipelatoclostridium ramosum	0.001004	Proteus mirabilis	0.000798
Monomicrobial	22M2100890	3199	0	14	Staphylococcus haemolyticus	0.44793	Planomicrobium glaciei	0.262547	Sphingomonas panni	0.070263	Azospirillum sp. TSH100	0.053933	Rubellimicrobium roseum	0.049111	Staphylococcus warneri	0.033563	Rubellimicrobium rubrum	0.019584	Pelomonas saccharophila	0.015997	Azospirillum thiophilum	0.012775	Moraxella osloensis	0.011606	Kocuria indica	0.007842	Flavisolibacter aluminii	0.006766
Polymicrobial	22M2101647	156894	479	117	Parvimonas micra	0.183142	Filifactor alocis	0.114768	Gemella morbillorum	0.111493	Peptostreptococcus stomatis	0.100091	Streptococcus intermedius	0.080178	Campylobacter rectus	0.041645	[Eubacterium] nodatum	0.032529	Porphyromonas endodontalis	0.032249	Phocaeicola abscessus	0.027255	Tannerella forsythia	0.021362	Porphyromonas gingivalis	0.019614	Fusobacterium mortiferum	0.019155
Monomicrobial	22M2101674	8458	0	22	Staphylococcus epidermidis	0.602676	Escherichia coli	0.196894	Klebsiella pneumoniae	0.072055	Proteus vulgaris	0.022383	Massilia terrae	0.020139	Deinococcus aetherius	0.015514	Citrobacter freundii complex sp. CFNIH4	0.011383	Delftia acidovorans	0.008447	Roseomonas mucosa	0.005499	Ochrobactrum anthropi	0.005484	Massilia putida	0.00523	Ochrobactrum lupini	0.004701
Monomicrobial	22M2101641	21078	323	10	Citrobacter koseri	0.988053	Pelomonas saccharophila	0.003654	Massilia terrae	0.001504	Massilia putida	0.001391	Salinicoccus salitudinis	0.001139	Sphingomonas adhaesiva	0.001092	Allobacillus halotolerans	0.000949	Laceyella sacchari	0.000842	Massilia haematophila	0.000713	Paracoccus chinensis	0.000664
Monomicrobial	22M2101576	493	0	17	Enterococcus faecium	0.198783	Escherichia coli	0.139959	Sphingomonas echinoides	0.129817	Lysobacter defluvii	0.126494	Klebsiella variicola	0.11359	Pelomonas saccharophila	0.073022	Massilia terrae	0.045378	Ochrobactrum lupini	0.044713	Cupriavidus metallidurans	0.036511	Lysobacter spongiicola	0.033749	Ochrobactrum anthropi	0.026281	Massilia haematophila	0.009046
Polymicrobial	22M2101573	198183	5	140	Parvimonas micra	0.260932	Mogibacterium timidum	0.16999	Peptostreptococcus stomatis	0.107884	Faecalibacterium prausnitzii	0.067395	Escherichia coli	0.052094	Pyramidobacter piscolens	0.043364	Phascolarctobacterium faecium	0.041461	Dialister pneumosintes	0.039423	Anaerotignum faecicola	0.0178	Ruthenibacterium lactatiformans	0.016419	[Eubacterium] nodatum	0.014822	Enterocloster citroniae	0.01065
Monomicrobial	22M2101540	9175	0	6	Corynebacterium striatum	0.42335	Escherichia coli	0.325703	Klebsiella pneumoniae	0.236872	Salmonella enterica	0.007747	Serratia fonticola	0.004255	Pseudomonas stutzeri	0.002073
Polymicrobial	22M2101506	219699	14	135	Pyramidobacter piscolens	0.310751	Bacteroides fragilis	0.173213	Fusobacterium varium	0.084077	Phocaeicola vulgatus	0.069119	Escherichia coli	0.052358	Anaerotignum lactatifermentans	0.037308	Phascolarctobacterium faecium	0.031407	Christensenella minuta	0.029819	Proteus mirabilis	0.019736	Cloacibacillus evryensis	0.018139	Frisingicoccus caecimuris	0.015935	Dysosmobacter welbionis	0.007715
Polymicrobial	22M2101520	76563	24	18	Streptococcus gwangjuense	0.503239	Streptococcus mitis	0.274382	Streptococcus salivarius	0.113138	Streptococcus oralis	0.044957	Streptococcus sp. FDAARGOS_192	0.033137	Streptococcus gordonii	0.010622	Streptococcus pseudopneumoniae	0.009345	Klebsiella pneumoniae	0.003667	Escherichia coli	0.002134	[Eubacterium] rectale	0.001228	Streptococcus pneumoniae	0.001129	Streptococcus anginosus	0.001006
Monomicrobial	22M2101703	155506	112	5	Staphylococcus aureus	0.998263	Escherichia coli	0.001171	Klebsiella pneumoniae	0.00027	Kytococcus schroeteri	0.00018	Stenotrophomonas maltophilia	0.000116
Monomicrobial	22M2101676	21499	2	8	Staphylococcus epidermidis	0.843651	Escherichia coli	0.134883	Klebsiella pneumoniae	0.009271	Citrobacter portucalensis	0.005865	Populibacterium corticicola	0.003212	Novosphingobium panipatense	0.001396	Bacillus caseinilyticus	0.001117	Enterobacter bugandensis	0.000605
Monomicrobial	22M2101690	7328	13	9	Staphylococcus epidermidis	0.709131	Aeromonas caviae	0.141061	Escherichia coli	0.097184	Pseudomonas oleovorans	0.019683	Citrobacter youngae	0.016402	Proteus vulgaris	0.007239	Serratia fonticola	0.004237	Enterobacter bugandensis	0.002734	Proteus sp. CD3	0.002329
Polymicrobial	22M2101430	95386	2	22	Prevotella denticola	0.361338	Parvimonas micra	0.230985	Dialister pneumosintes	0.16546	Dialister invisus	0.118097	Gemella morbillorum	0.046849	Fusobacterium nucleatum	0.039075	Streptococcus intermedius	0.013882	Campylobacter gracilis	0.012014	[Eubacterium] brachy	0.005378	Prevotella intermedia	0.001718	Peptococcus niger	0.001057	Laceyella sacchari	0.000891
Monomicrobial	22M2101288	33	0	3	Pseudomonas aeruginosa	0.8125	Enterococcus faecalis	0.125	Kallotenue papyrolyticum	0.0625
Polymicrobial	22M2101437	175582	1	11	Escherichia coli	0.514464	Klebsiella variicola	0.242272	Klebsiella pneumoniae	0.219451	Klebsiella quasipneumoniae	0.020749	Enterobacter hormaechei	0.001886	Enterobacter cloacae	0.000532	Laceyella sacchari	0.000202	Klebsiella aerogenes	0.000171	Salmonella enterica	0.000111	Enterobacteriaceae bacterium strain FGI 57	9.28e-05	Klebsiella sp. LY	6.91e-05
Monomicrobial	22M2101414	124372	253	4	Fusobacterium nucleatum	0.703942	Streptococcus intermedius	0.220117	[Eubacterium] brachy	0.075107	Laceyella sacchari	0.000834
Polymicrobial	22M2101404	595	198	12	Neisseria mucosa	0.545716	Neisseria sicca	0.292752	Klebsiella pneumoniae	0.033683	Escherichia coli	0.028889	Neisseria macacae	0.022037	Brevundimonas nasdae	0.021187	Klebsiella quasipneumoniae	0.014739	Bradyrhizobium viridifuturi	0.014286	Bradyrhizobium mercantei	0.014286	Brevundimonas sp. GW460-12-10-14-LB2	0.007384	Laceyella sacchari	0.003361	Salinicoccus kunmingensis	0.001681
Polymicrobial	22M2101351	32371	0	1	Klebsiella pneumoniae	1
Monomicrobial	22M2101301	5711	99	11	Pantoea sp. SO10	0.422355	Citrobacter youngae	0.156423	Pantoea septica	0.152109	Enterobacter hormaechei	0.076672	Pantoea stewartii	0.073298	Citrobacter pasteurii	0.035589	Pantoea dispersa	0.03397	Erwinia tasmaniensis	0.017056	Enterobacter bugandensis	0.015657	Citrobacter sp. CF971	0.009391	Pantoea vagans	0.00748
Monomicrobial	22M2101395	50613	714	9	Citrobacter sp. CF971	0.478726	Citrobacter freundii	0.270257	Citrobacter freundii complex sp. CFNIH4	0.206518	Citrobacter portucalensis	0.037149	Cnuella takakiae	0.003122	Pseudomonas aeruginosa	0.001758	Sphingomonas sp. NIC1	0.001502	Acinetobacter sp. TTH0-4	0.000494	Klebsiella pneumoniae	0.000474
Monomicrobial	22M2101259	92	26	5	Campylobacter coli	0.488068	Campylobacter jejuni	0.414106	Escherichia coli	0.065217	Aeromonas caviae	0.021739	Laceyella sacchari	0.01087
Monomicrobial	22M2101274	862	0	7	Klebsiella pneumoniae	0.480278	Enterococcus faecalis	0.364269	Bradyrhizobium mercantei	0.065841	Bradyrhizobium viridifuturi	0.065841	Staphylococcus hominis	0.011601	Methylobacterium goesingense	0.009281	Bradyrhizobium embrapense	0.002889
Monomicrobial	22M2101508	44621	4373	18	Staphylococcus lugdunensis	0.981683	Klebsiella pneumoniae	0.003521	Alkanindiges illinoisensis	0.002242	Paracoccus chinensis	0.002198	Novosphingobium sp. P6W	0.002153	Pseudomonas oleovorans	0.001435	Laceyella sacchari	0.00114	Curvibacter fontanus	0.000852	Xanthomonas campestris	0.00074	Sphingomonas dokdonensis	0.000673	Comamonas denitrificans	0.000673	Glaciihabitans tibetensis	0.000538
Polymicrobial	22M2101341	1426	4	7	Enterococcus faecalis	0.668116	Cutibacterium acnes	0.106522	Stenotrophomonas maltophilia	0.068116	Escherichia coli	0.060145	Staphylococcus capitis	0.043478	Halomonas sp. GT	0.026812	Roseomonas aquatica	0.026812
Monomicrobial	22M2101384	140574	7	2	Klebsiella pneumoniae	0.999744	Pseudomonas aeruginosa	0.000256
Monomicrobial	22M2101478	742	27	15	Enterococcus faecium	0.437247	Acinetobacter johnsonii	0.140351	Sphingomonas lutea	0.112876	Escherichia coli	0.106096	Moraxella osloensis	0.074224	Caulobacter mirabilis	0.032389	Shigella dysenteriae	0.030059	Shigella flexneri	0.024439	Pseudomonas putida	0.015066	Pseudomonas koreensis	0.007876	Sphingomonas sediminicola	0.007232	Paracoccus sanguinis	0.006748
Monomicrobial	22M2101470	7138	143	14	Staphylococcus lugdunensis	0.908617	Delftia sp. Cs1-4	0.019926	Delftia acidovorans	0.017247	Sphingopyxis solisilvae	0.009152	Bradyrhizobium viridifuturi	0.007322	Bradyrhizobium mercantei	0.007322	Brachybacterium faecium	0.006055	Ochrobactrum lupini	0.005543	Ochrobactrum anthropi	0.005017	Metabacillus litoralis	0.003943	Lactobacillus iners	0.003379	Escherichia coli	0.002957
Monomicrobial	22M2102932	24510	67	1	Staphylococcus aureus	1
Polymicrobial	22M2103050	63022	37	23	Filifactor alocis	0.51475	Campylobacter rectus	0.181534	Fusobacterium nucleatum	0.138496	Treponema socranskii	0.070391	Campylobacter showae	0.061679	Fretibacterium fastidiosum	0.008534	Peptostreptococcaceae bacterium oral taxon 929	0.005153	Tannerella forsythia	0.004091	Peptoniphilus mikwangii	0.002774	[Eubacterium] saphenum	0.002048	Finegoldia magna	0.001643	Sporanaerobacter acetigenes	0.001287
Polymicrobial	22M2103124	6317	167	8	Klebsiella pneumoniae	0.968254	Streptococcus salivarius	0.007935	Enterobacter bugandensis	0.005713	Escherichia coli	0.004608	Granulicatella adiacens	0.003968	Veillonella parvula	0.003809	Haemophilus parainfluenzae	0.00365	Streptococcus agalactiae	0.002063
Monomicrobial	22M2103142	23802	394	3	Escherichia coli	0.997938	Methylobacterium sp. XJLW	0.001052	Janibacter melonis	0.00101
Monomicrobial	22M2009749	202157	42	3	Paraclostridium benzoelyticum	0.762686	Paraclostridium bifermentans	0.236452	Laceyella sacchari	0.000862
Monomicrobial	22M2103182	81156	170	2	Klebsiella pneumoniae	0.999854	Laceyella sacchari	0.000146

## Sheet: NanoCLUST_data
Supplementary 2 The twelve most abundant species of each sample classified by NanoCLUST
No. of cultured species	Sample ID	No. of classified species	Organism 1		Organism 2		Organism 3		Organism 4		Organism 5		Organism 6		Organism 7		Organism 8		Organism 9		Organism 10		Organism 11		Organism 12
			taxid	rel_abundance	taxid	rel_abundance	taxid	rel_abundance	taxid	rel_abundance	taxid	rel_abundance	taxid	rel_abundance	taxid	rel_abundance	taxid	rel_abundance	taxid	rel_abundance	taxid	rel_abundance	taxid	rel_abundance	taxid	rel_abundance
None	20MB069698	N/A	No reads
None	19MB067693	N/A	Failed
None	18MB380975	N/A	Failed
None	19MB069145	N/A	Failed
None	19MB068751	N/A	Failed
None	18MB084305	1	Streptococcus canis	1
None	19MB090618	4	Streptococcus pneumoniae	0.989561	Fusobacterium periodonticum	0.00487077	Campylobacter showae	0.00370136	Shigella flexneri	0.00186677
None	20MB068970	5	Prevotella oris	0.36148	Lactobacillus delbrueckii	0.285579	Streptococcus anginosus	0.154649	Streptococcus oralis	0.136622	Moraxella osloensis	0.0616698
None	19MB069360	N/A	Failed
None	20MP2015465	13	Methylobacterium marchantiae	0.204082	Sphingomonas hankookensis	0.202091	Melaminivora jejuensis	0.0950722	Singulisphaera rosea	0.0821304	Pseudomonas oleovorans	0.0791439	Exiguobacterium indicum	0.0666999	Methylobacterium indicum	0.0592334	Pantoea allii	0.0562469	Sphingomonas melonis	0.0343454	Paracoccus chinensis	0.0318566	Brucella lupini	0.0313589	Methylobacterium aquaticum	0.0288701
None	20MP2015461	5	Methylobacterium indicum	0.274939	Enterococcus cecorum	0.201946	Enterococcus gallinarum	0.182482	Staphylococcus aureus	0.175182	Shigella sonnei	0.16545
None	20MP2015462	16	Methylobacterium platani	0.155807	Facklamia hominis	0.127479	Sphingomonas roseiflava	0.117406	Methylobacterium marchantiae	0.0912811	Sphingomonas hankookensis	0.0875039	Acinetobacter johnsonii	0.0576015	Shigella flexneri	0.056972	Shigella sonnei	0.0544539	Pseudoxanthomonas taiwanensis	0.0475291	Staphylococcus hominis	0.0377715	Massilia timonae	0.0358829	Methylorubrum populi	0.0355681
Polymicrobial	20MP2013809	3	Streptococcus anginosus	0.964324	Prevotella denticola	0.0350034	Fusobacterium nucleatum	0.000672358
Monomicrobial	20MP2014075	6	Burkholderia metallica	0.793618	Burkholderia cepacia	0.113695	Shigella sonnei	0.0501924	Shigella flexneri	0.0202053	Methylobacterium aquaticum	0.0126684	Paracoccus chinensis	0.00962155
Monomicrobial	20MP2014874	9	Shigella flexneri	0.446537	Staphylococcus capitis	0.171745	Methylobacterium indicum	0.0819945	Moraxella osloensis	0.0698061	Melaminivora jejuensis	0.0648199	Staphylococcus aureus	0.0603878	Pseudomonas oleovorans	0.0387812	Paracoccus huijuniae	0.0365651	Paracoccus chinensis	0.0293629
Polymicrobial	20MP2014925	7	Shigella flexneri	0.394588	Shigella sonnei	0.385228	Escherichia fergusonii	0.0999907	Staphylococcus aureus	0.0531925	Staphylococcus capitis	0.0484663	Methylobacterium aquaticum	0.010101	Methylorubrum populi	0.00843295
Monomicrobial	20MP2014868	3	Shigella flexneri	0.426612	Shigella sonnei	0.373114	Methylobacterium indicum	0.200274
Monomicrobial	20MP4201137	1	Pseudomonas aeruginosa	1
Polymicrobial	19B1413481	32	Streptococcus salivarius	0.299718	Streptococcus intermedius	0.193579	Peptostreptococcus stomatis	0.145385	Streptococcus anginosus	0.093341	Veillonella parvula	0.065126	Veillonella dispar	0.062282	Streptococcus gordonii	0.033853	Klebsiella pneumoniae	0.020151	Haemophilus parainfluenzae	0.012229	Paraclostridium benzoelyticum	0.010837	Streptococcus parasanguinis	0.010197	Parvimonas micra	0.008887
Polymicrobial	19B1413498	24	Parvimonas micra	0.593222	Streptococcus anginosus	0.152322	Streptococcus constellatus	0.078807	Peptostreptococcus stomatis	0.039162	Gemella morbillorum	0.036605	[Eubacterium] infirmum	0.026157	Shigella flexneri	0.018832	Phascolarctobacterium faecium	0.012188	Pyramidobacter piscolens	0.009421	Mogibacterium timidum	0.004936	Eubacterium callanderi	0.004842	Streptococcus intermedius	0.003982
Monomicrobial	19B1414530	1	Staphylococcus aureus	1
Polymicrobial	19B1584185	53	Parvimonas micra	0.264028	Peptostreptococcus stomatis	0.229958	Comamonas terrigena	0.148916	Christensenella massiliensis	0.084408	Escherichia fergusonii	0.052597	Filifactor alocis	0.042499	Ihubacter massiliensis	0.033109	Flavonifractor plautii	0.024647	Anaerotignum faecicola	0.013452	Escherichia marmotae	0.011511	Coprococcus catus	0.010424	Oscillibacter valericigenes	0.006478
Polymicrobial	19B1591103	14	Parvimonas micra	0.892651	Peptostreptococcus stomatis	0.087449	Streptococcus intermedius	0.005998	Dialister pneumosintes	0.002472	Tissierella creatinini	0.002129	Phascolarctobacterium faecium	0.002062	Mogibacterium timidum	0.001231	Escherichia fergusonii	0.001164	Aminipila butyrica	0.001142	Mogibacterium neglectum	0.000876	Streptococcus constellatus	0.000798	Eubacterium limosum	0.000732
Monomicrobial	19B1591110	1	Staphylococcus aureus	1
Monomicrobial	19B1592898	5	Staphylococcus aureus	0.99341	Streptococcus gwangjuense	0.003113	Gemella haemolysans	0.001853	Haemophilus haemolyticus	0.001052	Haemophilus parainfluenzae	0.000573
Polymicrobial	19B1608526	38	Parvimonas micra	0.370709	[Eubacterium] nodatum	0.152977	Gemella morbillorum	0.12145	Peptostreptococcus stomatis	0.118808	Streptococcus mitis	0.049689	Fusobacterium necrophorum	0.04735	Aminipila butyrica	0.030173	[Eubacterium] minutum	0.027899	Streptococcus oralis	0.013689	Streptococcus sanguinis	0.012704	Streptococcus troglodytidis	0.005751	Ihubacter massiliensis	0.004635
Polymicrobial	19B1610381	16	Parvimonas micra	0.867895	Streptococcus anginosus	0.080384	Peptostreptococcus stomatis	0.013615	Klebsiella pneumoniae	0.008883	Streptococcus intermedius	0.006859	Streptococcus constellatus	0.005489	Fusobacterium nucleatum	0.002995	[Eubacterium] nodatum	0.00278	Christensenella massiliensis	0.002668	Gottschalkia acidurici	0.002392	Ihubacter massiliensis	0.001359	Fusobacterium simiae	0.001298
Monomicrobial	19B2123916	1	Staphylococcus aureus	1
Polymicrobial	19B2135719	49	Gemmiger formicilis	0.264583	Romboutsia timonensis	0.193947	Clostridium perfringens	0.117376	Clostridium paraputrificum	0.048814	Citrobacter koseri	0.0459	Escherichia marmotae	0.043145	Morganella morganii	0.031011	Phocaeicola coprocola	0.026938	Shigella sonnei	0.024598	Granulicatella elegans	0.024109	Clostridium saudiense	0.023981	Streptococcus parasanguinis	0.0181
Polymicrobial	19B2024141	19	Stenotrophomonas maltophilia	0.307551	Corynebacterium striatum	0.226445	Streptococcus anginosus	0.169038	Streptococcus mitis	0.079534	Staphylococcus haemolyticus	0.041646	Staphylococcus epidermidis	0.033554	Streptococcus salivarius	0.02995	Parvimonas micra	0.023699	Mogibacterium timidum	0.018139	[Eubacterium] infirmum	0.018062	Pseudomonas aeruginosa	0.013844	Fretibacterium fastidiosum	0.013767
Polymicrobial	19B2146827	35	Peptostreptococcus stomatis	0.267309	Parvimonas micra	0.259275	Dialister pneumosintes	0.118838	Streptococcus anginosus	0.118231	Gemella morbillorum	0.108302	Solobacterium moorei	0.031507	Streptococcus dysgalactiae	0.016809	Mogibacterium timidum	0.010145	Bacteroides fragilis	0.009764	Pyramidobacter piscolens	0.00584	Catonella morbi	0.005181	Anaerostipes hadrus	0.004254
None	19B2153436	6	Streptococcus intermedius	0.814855	Parvimonas micra	0.149158	Dialister pneumosintes	0.029889	Campylobacter rectus	0.00335	Fusobacterium nucleatum	0.001675	[Eubacterium] brachy	0.001073
Monomicrobial	20B0927194	12	Parvimonas micra	0.399207	Streptococcus intermedius	0.376058	Gemella morbillorum	0.151711	Peptostreptococcus stomatis	0.041194	Streptococcus constellatus	0.011292	Gemella sanguinis	0.005001	Streptococcus anginosus	0.004624	Gemella haemolysans	0.004026	Gemella palaticanis	0.003932	Campylobacter concisus	0.001059	Streptococcus salivarius	0.001017	Cytobacillus eiseniae	0.000881
Monomicrobial	20B1025354	7	Klebsiella pneumoniae	0.371824	Parvimonas micra	0.154734	Staphylococcus pasteuri	0.132794	Moraxella osloensis	0.118938	Gemella morbillorum	0.08776	Anaerotignum faecicola	0.073903	Streptococcus intermedius	0.060046
None	19B2153759	6	Parvimonas micra	0.455587	Shigella flexneri	0.158548	Streptococcus constellatus	0.158548	Sphingomonas hankookensis	0.081184	Acinetobacter lwoffii	0.077364	Comamonas terrigena	0.068768
Monomicrobial	21B0926485	10	Streptococcus agalactiae	0.986649	Acinetobacter schindleri	0.00486	Acinetobacter lwoffii	0.002259	Escherichia coli	0.001422	Massilia timonae	0.001371	Streptococcus anginosus	0.000908	Flavitalea populi	0.000817	Sphingomonas hankookensis	0.000585	Alkanindiges illinoisensis	0.000565	Ideonella sakaiensis	0.000565
Monomicrobial	21B0926409	3	Staphylococcus aureus	0.983106	Streptococcus anginosus	0.009963	Escherichia coli	0.006931
Monomicrobial	21B0921459	1	Staphylococcus aureus	1
Monomicrobial	21B0935230	1	Staphylococcus aureus	1
Polymicrobial	21B1705131	33	Parvimonas micra	0.58649	Peptostreptococcus stomatis	0.080591	Dialister pneumosintes	0.076184	Enterococcus faecalis	0.06251	Streptococcus intermedius	0.040823	Bacteroides fragilis	0.022415	Escherichia fergusonii	0.019821	Enterococcus avium	0.018988	Dialister invisus	0.015013	Shigella flexneri	0.014655	Shigella sonnei	0.010279	Fusobacterium nucleatum	0.007391
Polymicrobial	21MB105254	3	Klebsiella pneumoniae	0.545596	Streptococcus agalactiae	0.395598	Klebsiella quasipneumoniae	0.058806
Monomicrobial	21MB105242	4	Staphylococcus aureus	0.98817	Bacillus altitudinis	0.006656	Shigella sonnei	0.003987	Haemophilus parainfluenzae	0.001187
Monomicrobial	21MB060114	2	Klebsiella pneumoniae	0.999053	Bacillus spizizenii	0.000947
Monomicrobial	D151144	4	Escherichia fergusonii	0.997815	Melaminivora jejuensis	0.00083	Sphingomonas paucimobilis	0.000779	Comamonas phosphati	0.000577
Monomicrobial	D151127	1	Acinetobacter pittii	1
Polymicrobial	D304621	14	Escherichia fergusonii	0.902947	Fusobacterium varium	0.056309	Bacteroides fragilis	0.008503	Escherichia marmotae	0.007545	Campylobacter gracilis	0.006679	Megasphaera micronuciformis	0.004803	Shimwellia blattae	0.002979	Escherichia albertii	0.002597	Haemophilus parainfluenzae	0.002134	[Ruminococcus] gnavus	0.001587	Lactobacillus gasseri	0.001443	Lactobacillus crispatus	0.001196
Monomicrobial	D151207	1	Klebsiella pneumoniae	1
Monomicrobial	D151193	2	Streptococcus dysgalactiae	0.998214	Escherichia fergusonii	0.001786
Monomicrobial	D151203	41	Escherichia fergusonii	0.322387	Peptostreptococcus stomatis	0.278641	Parvimonas micra	0.076737	Faecalibacterium prausnitzii	0.055066	Gemella morbillorum	0.04728	Oscillibacter valericigenes	0.045048	Bacteroides fragilis	0.031759	Porphyromonas endodontalis	0.016713	Enterocloster aldenensis	0.015975	Anaerotignum faecicola	0.011825	[Eubacterium] nodatum	0.011623	Campylobacter rectus	0.008765
Polymicrobial	D151204	57	Peptostreptococcus stomatis	0.42117	Parvimonas micra	0.125174	Faecalibacterium prausnitzii	0.071722	Oscillibacter valericigenes	0.065458	Alloprevotella tannerae	0.05079	Bacteroides fragilis	0.028385	Peptostreptococcus anaerobius	0.024783	Escherichia fergusonii	0.021419	Fusobacterium nucleatum	0.018214	Porphyromonas endodontalis	0.017715	Campylobacter rectus	0.014736	Enterocloster aldenensis	0.013898
Monomicrobial	21M2014854	2	Escherichia fergusonii	0.998382	Shigella sonnei	0.001618
Polymicrobial	21M2014857	27	Parvimonas micra	0.842617	Bacteroides fragilis	0.038005	[Clostridium] symbiosum	0.028791	Porphyromonas endodontalis	0.016425	[Eubacterium] minutum	0.008595	Ruthenibacterium lactatiformans	0.006312	Enterocloster citroniae	0.006054	Mogibacterium timidum	0.005506	Tepidimicrobium xylanilyticum	0.005361	Faecalibacterium prausnitzii	0.004649	Campylobacter showae	0.003988	Oscillibacter valericigenes	0.003967
Monomicrobial	21M2014906	22	Deinococcus geothermalis	0.564152	Kocuria massiliensis	0.13005	Ralstonia mannitolilytica	0.1048	Effusibacillus pohliae	0.059102	Comamonas phosphati	0.015274	Enterococcus gallinarum	0.013466	Noviherbaspirillum canariense	0.012656	Pelomonas saccharophila	0.010599	Curvibacter delicatus	0.009227	Melaminivora jejuensis	0.009227	Sphingomonas changbaiensis	0.00904	Ruthenibacterium lactatiformans	0.00798
Monomicrobial	21M2015020	20	Staphylococcus aureus	0.701934	Deinococcus geothermalis	0.192931	Ralstonia mannitolilytica	0.035124	Effusibacillus pohliae	0.029433	Sphingomonas paucimobilis	0.005337	Phreatobacter oligotrophus	0.004509	Flavisolibacter ginsenosidimutans	0.003651	Burkholderia stabilis	0.00343	Methylibium petroleiphilum	0.003193	Denitratisoma oestradiolicum	0.003104	Pelomonas saccharophila	0.002587	Sphingomonas echinoides	0.002454
Polymicrobial	21M2015021	20	Klebsiella pneumoniae	0.891794	Streptococcus salivarius	0.033256	Streptococcus agalactiae	0.029692	Deinococcus geothermalis	0.018436	Effusibacillus pohliae	0.004269	Ralstonia mannitolilytica	0.003432	Streptococcus sanguinis	0.00287	Granulicatella adiacens	0.002257	Sphingomonas hankookensis	0.002257	Veillonella parvula	0.002186	Gemella haemolysans	0.001614	Streptococcus gordonii	0.001297
Monomicrobial	21M2015022	25	Staphylococcus aureus	0.759617	Deinococcus geothermalis	0.14009	Effusibacillus pohliae	0.025438	Ralstonia mannitolilytica	0.015627	Phreatobacter oligotrophus	0.007245	Sphingomonas melonis	0.007085	Sphingomonas echinoides	0.00621	Sphingomonas changbaiensis	0.005219	Sphingomonas hankookensis	0.004344	Pelomonas saccharophila	0.004053	Methylobacterium indicum	0.003382	Methylobacterium organophilum	0.002726
Monomicrobial	21M2015310	8	Staphylococcus aureus	0.920085	Deinococcus geothermalis	0.044531	Aliterella antarctica	0.010206	Effusibacillus pohliae	0.007992	Ralstonia mannitolilytica	0.006788	Comamonas nitrativorans	0.003707	Phreatobacter oligotrophus	0.003707	Sphingomonas hankookensis	0.002985
Monomicrobial	21M2015468	10	Deinococcus geothermalis	0.628718	Effusibacillus pohliae	0.16892	Escherichia fergusonii	0.077843	Ralstonia mannitolilytica	0.044969	Comamonas terrigena	0.020777	Alcaligenes aquatilis	0.017219	Atopostipes suicloacalis	0.012665	Pelomonas saccharophila	0.011385	Melaminivora jejuensis	0.009819	Finegoldia magna	0.007685
Monomicrobial	21M2015506	12	Escherichia fergusonii	0.494333	Deinococcus geothermalis	0.313316	Effusibacillus pohliae	0.090396	Ralstonia mannitolilytica	0.059918	Pelomonas saccharophila	0.010566	Phreatobacter oligotrophus	0.006547	Pseudomonas migulae	0.006005	Bradyrhizobium rifense	0.005283	Sphingomonas echinoides	0.004515	Sphingomonas melonis	0.003793	Caulobacter segnis	0.002664	Occallatibacter savannae	0.002664
Polymicrobial	21M2011074	91	Blautia luti	0.164487	Faecalibacterium prausnitzii	0.121719	Anaerostipes hadrus	0.052347	Christensenella massiliensis	0.048491	Anaerobutyricum hallii	0.046591	Christensenella timonensis	0.04156	Ruminococcus bromii	0.040689	Gemmiger formicilis	0.033065	Oscillibacter valericigenes	0.024436	Fusicatenibacter saccharivorans	0.021462	Acutalibacter muris	0.021227	[Eubacterium] siraeum	0.019148
Monomicrobial	21M2011247	1	Streptococcus dysgalactiae	1
Polymicrobial	21M2011287	44	Streptococcus mitis	0.187356	Granulicatella elegans	0.151771	Streptococcus parasanguinis	0.12813	Neisseria perflava	0.104562	Streptococcus salivarius	0.076375	Gemella sanguinis	0.072384	Streptococcus australis	0.05185	Staphylococcus aureus	0.035574	Gemella haemolysans	0.02973	Abiotrophia defectiva	0.02906	Streptococcus oralis	0.01783	Streptococcus constellatus	0.016797
Monomicrobial	21M2012078	5	Staphylococcus saccharolyticus	0.265799	Sphingomonas hankookensis	0.252788	Methylibium petroleiphilum	0.19145	Methylobacterium goesingense	0.156134	Streptococcus salivarius	0.133829
Polymicrobial	21M2015966	7	Escherichia fergusonii	0.479731	Streptococcus anginosus	0.364666	Clostridium perfringens	0.150722	Clostridium tarantellae	0.001651	Mixta theicola	0.00127	Izhakiella capsodis	0.00098	Streptococcus dentasini	0.00098
Monomicrobial	21M2015974	13	Staphylococcus saccharolyticus	0.479598	Deinococcus geothermalis	0.218889	Deinococcus caeni	0.067878	Effusibacillus pohliae	0.057328	Sphingomonas hankookensis	0.034066	Ralstonia mannitolilytica	0.033177	Moraxella osloensis	0.024406	Pelomonas saccharophila	0.01983	Methylobacterium indicum	0.016652	Methylobacterium goesingense	0.016525	Thermaerobacter subterraneus	0.01322	Sphingomonas paucimobilis	0.010805
Monomicrobial	21M2016160	23	Streptococcus salivarius	0.603378	Ligilactobacillus salivarius	0.128737	Deinococcus geothermalis	0.114178	Streptococcus parasanguinis ATCC 15912	0.029203	Ralstonia mannitolilytica	0.01849	Effusibacillus pohliae	0.012571	Streptococcus mitis	0.011102	Streptococcus pneumoniae	0.011016	Streptococcus oralis subsp. tigurinus AZ_3a	0.009245	Sphingomonas hankookensis	0.007862	Staphylococcus saccharolyticus	0.006998	Acidovorax temperans	0.006739
Monomicrobial	21M2016200	8	Aquabacterium citratiphilum	0.386837	Deinococcus geothermalis	0.329799	Effusibacillus pohliae	0.089214	Listeria welshimeri	0.056673	Ralstonia mannitolilytica	0.04351	Sphingomonas frigidaeris	0.035466	Cellulosilyticum ruminicola	0.035101	Comamonas terrigena	0.0234
Monomicrobial	21M2016228	7	Escherichia fergusonii	0.986805	Deinococcus geothermalis	0.006432	Comamonas terrigena	0.003301	Melaminivora jejuensis	0.001244	Effusibacillus pohliae	0.000863	Acinetobacter seohaensis	0.000843	Ralstonia mannitolilytica	0.000512
Monomicrobial	21M2016226	13	Parvimonas micra	0.604988	Peptostreptococcus stomatis	0.155167	Fusobacterium varium	0.147169	Bacteroides thetaiotaomicron	0.031504	Citrobacter murliniae	0.017257	Proteus mirabilis	0.012957	Odoribacter splanchnicus	0.008858	Sutterella wadsworthensis	0.005962	Campylobacter curvus	0.004013	Paraeggerthella hongkongensis	0.003927	Howardella ureilytica	0.003641	Morganella morganii	0.002809
Polymicrobial	21M2015392	14	Fusobacterium varium	0.589972	Parvimonas micra	0.346261	Peptostreptococcus stomatis	0.028201	Fusobacterium gastrosuis	0.009853	Bacteroides thetaiotaomicron	0.006953	Campylobacter curvus	0.005482	Odoribacter splanchnicus	0.004597	Sutterella wadsworthensis	0.002756	Peptostreptococcus anaerobius	0.001697	Bacteroides faecichinchillae	0.001142	Paraeggerthella hongkongensis	0.000946	Proteus mirabilis	0.000936
Monomicrobial	21M2015710	13	Deinococcus geothermalis	0.407134	Staphylococcus saccharolyticus	0.27027	Moraxella osloensis	0.108737	Aquabacterium citratiphilum	0.054368	Effusibacillus pohliae	0.044469	Methylobacterium goesingense	0.023256	Variovorax ginsengisoli	0.018385	Ralstonia mannitolilytica	0.014613	Staphylococcus hominis	0.014456	Sphingomonas hankookensis	0.013671	Streptococcus sanguinis	0.011942	Pseudomonas migulae	0.010371
Monomicrobial	21M2015829	20	Deinococcus geothermalis	0.399023	Effusibacillus pohliae	0.116149	Ralstonia mannitolilytica	0.100453	Staphylococcus hominis	0.084641	Mitsuaria chitosanitabida	0.083827	Cutibacterium acnes	0.050692	Pelomonas saccharophila	0.018835	Staphylococcus saccharolyticus	0.017672	Sphingomonas hankookensis	0.016045	Comamonas phosphati	0.015928	Deinococcus radiodurans	0.013371	Janibacter indicus	0.011278
Monomicrobial	21M2016958	8	Staphylococcus saccharolyticus	0.533184	Burkholderia multivorans	0.39311	Stenotrophomonas maltophilia	0.066727	Staphylococcus epidermidis	0.002597	Burkholderia stabilis	0.001911	Bacillus fungorum	0.000876	Burkholderia rinojensis	0.000845	Burkholderia lata	0.00075
Monomicrobial	21M2017379	9	Streptococcus gordonii	0.988063	Staphylococcus hominis	0.002202	Streptococcus oralis	0.001866	Atopostipes suicloacalis	0.001748	Melaminivora jejuensis	0.001564	Pseudomonas plecoglossicida	0.00121	Nevskia soli	0.001194	Sphingomonas echinoides	0.001143	Sphingomonas metalli	0.001009
Monomicrobial	21M2016901	9	[Eubacterium] brachy	0.406124	Fusobacterium nucleatum	0.332795	Parvimonas micra	0.124832	Filifactor alocis	0.115126	Streptococcus constellatus	0.014263	Campylobacter rectus	0.00379	Pelomonas saccharophila	0.001231	Cutibacterium acnes	0.000927	Sphingomonas echinoides	0.000911
Monomicrobial	21M2017368	1	Escherichia fergusonii	1
Monomicrobial	21M2016293	9	Cutibacterium acnes	0.230769	Staphylococcus hominis	0.216063	Staphylococcus saccharolyticus	0.135747	Pelomonas saccharophila	0.082579	Atopostipes suicloacalis	0.075792	Alkalihalobacillus halodurans	0.069005	Ralstonia pickettii	0.06448	Finegoldia magna	0.063348	Enterococcus cecorum	0.062217
Monomicrobial	21M2017207	1	Streptococcus dysgalactiae	1
Polymicrobial	21M2016075	39	Parvimonas micra	0.699152	Peptostreptococcus stomatis	0.078606	Oscillibacter valericigenes	0.036403	Escherichia fergusonii	0.035526	Dialister pneumosintes	0.028994	Fusobacterium nucleatum	0.025408	Porphyromonas endodontalis	0.021127	Gemella morbillorum	0.014883	Streptococcus constellatus	0.00648	Alloprevotella tannerae	0.00538	Peptostreptococcus anaerobius	0.005131	Shigella boydii	0.003574
Monomicrobial	21M2016054	5	Streptococcus gordonii	0.782058	Comamonas phosphati	0.089712	[Brevibacterium] frigoritolerans	0.053632	Acinetobacter seohaensis	0.043881	Burkholderia stabilis	0.030717
Polymicrobial	21M2017025	99	Parvimonas micra	0.163326	Faecalibacterium prausnitzii	0.091077	Escherichia fergusonii	0.086558	Oscillibacter valericigenes	0.063968	Peptostreptococcus stomatis	0.054005	Anaerotignum faecicola	0.047353	Bacteroides fragilis	0.03152	Blautia luti	0.023491	Streptococcus intermedius	0.022193	Christensenella timonensis	0.022113	Phascolarctobacterium faecium	0.021332	Emergencia timonensis	0.018443
Monomicrobial	21M2017269	18	Deinococcus radiodurans	0.402754	Klebsiella pneumoniae	0.209302	Methylobacterium goesingense	0.091854	Moraxella osloensis	0.057035	Deinococcus wulumuqiensis	0.038586	Staphylococcus hominis	0.025984	Massilia putida	0.024035	Sphingomonas hankookensis	0.022346	Achromobacter kerstersii	0.020917	Cutibacterium acnes	0.018449	Paracoccus sanguinis	0.017409	Dermacoccus barathri	0.0165
Monomicrobial	21M2017304	8	Escherichia fergusonii	0.833784	Escherichia marmotae	0.131842	Sediminibacterium magnilacihabitans	0.009615	Cutibacterium acnes	0.00553	Pelomonas saccharophila	0.00553	Staphylococcus saccharolyticus	0.004964	Staphylococcus hominis	0.004587	Moraxella osloensis	0.004148
Monomicrobial	21M2016756	17	Pseudomonas oryzihabitans	0.258206	Paracoccus sediminis	0.21426	Pseudomonas fulva	0.200857	Acinetobacter radioresistens	0.078775	Paracoccus acridae	0.057349	Staphylococcus saccharolyticus	0.037017	Acinetobacter tandoii	0.027899	Paracoccus sanguinis	0.02407	Cutibacterium acnes	0.023158	Caulobacter segnis	0.018326	Sphingomonas mohensis	0.011944	Pelomonas saccharophila	0.011761
Monomicrobial	21M2017321	5	Escherichia fergusonii	0.997335	Qipengyuania sediminis	0.000834	Moraxella osloensis	0.000692	Acinetobacter haemolyticus	0.00061	Coprococcus eutactus	0.000529
Monomicrobial	21M2016813	5	Delftia lacustris	0.644593	Staphylococcus aureus	0.235541	Chryseobacterium scophthalmum	0.044845	Filifactor alocis	0.03772	Delftia acidovorans	0.037301
Monomicrobial	21M2017887	9	Pseudomonas aeruginosa	0.590084	Brucella intermedia	0.254358	Stenotrophomonas maltophilia	0.127987	Delftia lacustris	0.00985	Acinetobacter pittii	0.009368	Achromobacter denitrificans	0.003544	Mycoplasma salivarium	0.002711	Escherichia fergusonii	0.001335	Rhizobium lentis	0.000763
Monomicrobial	21M2017976	8	Staphylococcus aureus	0.619857	Pelomonas saccharophila	0.108229	Cutibacterium acnes	0.087209	Melaminivora jejuensis	0.051431	Anaerococcus hydrogenalis	0.04517	Comamonas phosphati	0.033542	Alloiococcus otitis	0.031306	Acetoanaerobium sticklandii	0.023256
Monomicrobial	21M2017878	2	Stenotrophomonas maltophilia	0.670282	Cutibacterium acnes	0.329718
Monomicrobial	21M2017892	2	Streptococcus dysgalactiae	0.99917	Massilia alkalitolerans	0.00083
Monomicrobial	21M2017483	23	Staphylococcus edaphicus	0.822852	Cutibacterium acnes	0.033012	Acinetobacter chinensis	0.019037	Streptococcus gordonii	0.016399	Pseudomonas helleri	0.009911	Sphingomonas echinoides	0.009768	Staphylococcus saccharolyticus	0.008913	Moraxella osloensis	0.008877	Serratia liquefaciens	0.007629	Staphylococcus ureilyticus	0.006809	Pseudomonas fluorescens	0.006417	Sediminibacterium salmoneum	0.005989
Monomicrobial	21M2017708	3	Staphylococcus aureus	0.996063	Cutibacterium acnes	0.002455	Silanimonas mangrovi	0.001483
Polymicrobial	21M2017242	5	Escherichia fergusonii	0.665289	Escherichia marmotae	0.181254	Streptococcus constellatus	0.137714	Klebsiella pneumoniae	0.01503	Serratia marcescens	0.000713
Monomicrobial	21M2017484	15	Enterococcus faecalis	0.633125	Acinetobacter tjernbergiae	0.141036	Staphylococcus saccharolyticus	0.036653	Arboricoccus pini	0.027775	Cutibacterium acnes	0.024132	Buttiauxella izardii	0.024018	Acinetobacter parvus	0.023108	Moraxella osloensis	0.018896	Delftia lacustris	0.015595	Amaricoccus kaplicensis	0.014684	Pseudomonas oryzihabitans	0.011269	Thermogutta terrifontis	0.010017
Monomicrobial	21M2017684	1	Streptococcus agalactiae	1
Polymicrobial	21M2018126	10	Aquitalea magnusonii	0.784649	Pelomonas saccharophila	0.047421	Serratia liquefaciens	0.035933	Streptococcus anginosus	0.030066	Ewingella americana	0.024444	Pseudomonas helleri	0.020533	Pectobacterium wasabiae	0.016377	Pantoea agglomerans	0.013933	Staphylococcus saccharolyticus	0.013689	Streptococcus gordonii	0.012955
Polymicrobial	21M2018340	37	Parvimonas micra	0.376369	Peptostreptococcus stomatis	0.206562	Gemella morbillorum	0.092793	Dialister invisus	0.060937	Escherichia fergusonii	0.049769	Fusobacterium nucleatum	0.047719	Solobacterium moorei	0.020988	Bacteroides fragilis	0.020308	Aquitalea magnusonii	0.01684	Streptococcus anginosus	0.016637	Pelomonas saccharophila	0.013443	Bacteroides faecis	0.009868
Polymicrobial	21M2018081	11	Escherichia fergusonii	0.583751	Shigella dysenteriae	0.373075	Morganella morganii	0.011335	Streptococcus parasanguinis	0.007767	Klebsiella pneumoniae	0.007106	Aquitalea magnusonii	0.006598	Prevotella veroralis	0.006211	Pelomonas saccharophila	0.001332	Veillonella atypica	0.00124	Cutibacterium acnes	0.000925	Staphylococcus saccharolyticus	0.000661
Monomicrobial	21M2018273	6	Enterococcus faecalis	0.459726	Aquitalea magnusonii	0.423557	Pelomonas saccharophila	0.059072	Staphylococcus saccharolyticus	0.025283	Cutibacterium acnes	0.021475	Aerococcus viridans	0.010886
Monomicrobial	21M2018358	11	Staphylococcus saccharolyticus	0.946033	Aquitalea magnusonii	0.032938	Pelomonas saccharophila	0.008867	Staphylococcus epidermidis	0.004245	Staphylococcus aureus	0.002489	Staphylococcus auricularis	0.001558	Cutibacterium acnes	0.001046	Massilia alkalitolerans	0.000847	Alkalihalobacillus halodurans	0.000805	Sediminibacterium magnilacihabitans	0.000596	Moraxella osloensis	0.000575
Monomicrobial	21M2018355	13	Aquitalea magnusonii	0.574533	Staphylococcus aureus	0.18567	Pseudomonas libanensis	0.080701	Pelomonas saccharophila	0.067097	Cutibacterium acnes	0.022769	Bradyrhizobium mercantei	0.022193	Steroidobacter agariperforans	0.010433	Sphingomonas echinoides	0.009338	Caulobacter segnis	0.009165	Acinetobacter oleivorans	0.006687	Haemophilus parainfluenzae	0.00415	Sphingomonas yabuuchiae	0.004093
Polymicrobial	21M2018291	7	Pelomonas saccharophila	0.427632	Enterococcus faecalis	0.160088	Aquitalea magnusonii	0.145833	Cutibacterium acnes	0.08114	Phenylobacterium haematophilum	0.065789	Staphylococcus saccharolyticus	0.0625	Streptococcus mitis	0.057018
Monomicrobial	21M2018106	35	Pseudomonas aeruginosa	0.475176	Aquitalea magnusonii	0.076766	Brucella intermedia	0.066389	Paracoccus sphaerophysae	0.064962	Brevundimonas nasdae	0.05389	Pelomonas saccharophila	0.033638	Sphingomonas ginsenosidimutans	0.02762	Aquincola tertiaricarbonis	0.022413	Staphylococcus hominis	0.021024	Qipengyuania sediminis	0.019211	Paracoccus chinensis	0.015932	Cutibacterium acnes	0.014967
Polymicrobial	21M2018094	45	Klebsiella pneumoniae	0.868398	Streptococcus anginosus	0.013845	Oscillibacter valericigenes	0.01343	Anaeroglobus geminatus	0.010683	Phascolarctobacterium faecium	0.008727	Victivallis vadensis	0.007541	[Eubacterium] infirmum	0.005382	Phocaeicola dorei	0.004581	Bacteroides salyersiae	0.004308	[Ruminococcus] gnavus	0.004146	Escherichia fergusonii	0.003852	Faecalibacterium prausnitzii	0.003801
Monomicrobial	21M2018164	18	Aquitalea magnusonii	0.410838	Staphylococcus saccharolyticus	0.160103	Staphylococcus devriesei	0.098585	Escherichia fergusonii	0.081776	Pelomonas saccharophila	0.079973	Staphylococcus auricularis	0.035461	Lactobacillus delbrueckii	0.030093	Staphylococcus ureilyticus	0.025156	Cutibacterium acnes	0.018926	Atopostipes suicloacalis	0.013714	Pseudomonas extremaustralis	0.009012	Streptococcus sanguinis	0.008816
Monomicrobial	21M2018699	22	Staphylococcus saccharolyticus	0.383559	Aquitalea magnusonii	0.261084	Moraxella osloensis	0.107207	Pelomonas saccharophila	0.104074	Epilithonimonas hominis	0.018535	Pseudomonas extremaustralis	0.013668	Atopostipes suicloacalis	0.012201	Cutibacterium acnes	0.010801	Escherichia fergusonii	0.009534	Pseudomonas libanensis	0.008801	Sediminibacterium magnilacihabitans	0.008667	Snodgrassella alvi	0.0072
Monomicrobial	21M2018666	20	Pseudomonas aeruginosa	0.94965	Aquitalea magnusonii	0.01506	Brevundimonas nasdae	0.013926	Pelomonas saccharophila	0.003896	Massilia putida	0.003603	Pseudomonas extremaustralis	0.001943	Bosea thiooxidans	0.001397	Escherichia fergusonii	0.001336	Dialister propionicifaciens	0.001154	Legionella tunisiensis	0.000901	Bradyrhizobium mercantei	0.00086	Staphylococcus haemolyticus	0.00086
Polymicrobial	21M2018967	21	Aquitalea magnusonii	0.749589	Pseudomonas aeruginosa	0.101571	Pseudomonas otitidis	0.05349	Moraxella osloensis	0.022518	Brevundimonas nasdae	0.011982	Escherichia fergusonii	0.009988	Klebsiella pneumoniae	0.008718	Pelomonas saccharophila	0.008455	Massilia putida	0.006243	Pseudomonas libanensis	0.004709	Staphylococcus aureus	0.003242	Enterobacter cloacae	0.00265
Monomicrobial	21M2018778	2	Pseudomonas aeruginosa	0.908546	Pelomonas saccharophila	0.091454
Polymicrobial	21M2018826	28	Escherichia fergusonii	0.868943	Faecalibacterium prausnitzii	0.066669	Bacteroides fragilis	0.006638	Ruminococcus bromii	0.005538	Gemmiger formicilis	0.005517	Shimwellia blattae	0.005277	Oscillibacter valericigenes	0.004983	Serratia oryzae	0.004816	Streptococcus intermedius	0.003476	Samsonia erythrinae	0.003403	Phocaeicola dorei	0.003099	Klebsiella pneumoniae	0.002157
Monomicrobial	21M2018588	1	Acinetobacter baumannii	1
Polymicrobial	21M2018565	70	Oscillibacter valericigenes	0.337801	Comamonas terrigena	0.181525	Phascolarctobacterium faecium	0.061218	Intestinimonas butyriciproducens	0.056675	Alistipes onderdonkii	0.030261	Eisenbergiella massiliensis	0.02746	Bacteroides thetaiotaomicron	0.024927	Parabacteroides gordonii	0.019647	Sporobacter termitidis	0.018789	Parabacteroides distasonis	0.017449	Cloacibacillus evryensis	0.016524	Anaerotignum faecicola	0.015948
Polymicrobial	21M2018371	49	Parvimonas micra	0.521282	Gemella morbillorum	0.067689	[Eubacterium] brachy	0.049937	Alloprevotella tannerae	0.036698	Mogibacterium timidum	0.035819	Dialister pneumosintes	0.033956	Escherichia fergusonii	0.028944	Phascolarctobacterium faecium	0.028301	Bacteroides fragilis	0.026595	Fusobacterium nucleatum	0.021767	Solobacterium moorei	0.020232	Streptococcus constellatus	0.019747
None	21M2019392	6	Pelomonas saccharophila	0.331845	Finegoldia magna	0.191964	Occallatibacter savannae	0.165179	Steroidobacter agariperforans	0.127976	Aquitalea magnusonii	0.095238	Staphylococcus hominis	0.087798
None	21M2019256	10	Pelomonas saccharophila	0.606536	Moraxella osloensis	0.104575	Atopostipes suicloacalis	0.074837	Sediminibacterium magnilacihabitans	0.051307	Sphingomonas echinoides	0.05	Rhizobium cellulosilyticum	0.03268	Bradyrhizobium rifense	0.023529	Cutibacterium granulosum	0.022549	Steroidobacter agariperforans	0.016993	Tardiphaga robiniae	0.016993
Polymicrobial	21M2019039	67	Fusobacterium varium	0.223377	Frisingicoccus caecimuris	0.102617	Oscillibacter valericigenes	0.08283	[Ruminococcus] gnavus	0.046308	Escherichia fergusonii	0.045572	Phocaeicola vulgatus	0.041978	Butyricimonas phoceensis	0.033621	Faecalibacterium prausnitzii	0.033167	Ruthenibacterium lactatiformans	0.032063	Faecalicatena fissicatena	0.027559	Bacteroides uniformis	0.020913	Faecalicatena orotica	0.018229
Monomicrobial	21M2019447	2	Staphylococcus aureus	0.998303	Enterococcus faecium	0.001697
Polymicrobial	21M2019157	37	Escherichia fergusonii	0.224996	Gemella morbillorum	0.211747	Parvimonas micra	0.092648	Porphyromonas endodontalis	0.081647	Campylobacter concisus	0.05778	Fusobacterium nucleatum	0.035682	Butyricicoccus faecihominis	0.026068	Prevotella oris	0.023389	Aminipila butyrica	0.022289	Enterocloster bolteae	0.018893	Veillonella parvula	0.01875	Faecalibacterium prausnitzii	0.017841
Monomicrobial	21M2017996	10	Tardiphaga robiniae	0.185246	Bradyrhizobium mercantei	0.142623	Brevundimonas nasdae	0.134426	Pantoea ananatis	0.119672	Sphingomonas echinoides	0.111475	Sediminibacterium salmoneum	0.070492	Sediminibacterium magnilacihabitans	0.067213	Pelomonas saccharophila	0.065574	Mageeibacillus indolicus	0.059836	Sphingomonas yabuuchiae	0.043443
Polymicrobial	21M2019211	43	Porphyromonas endodontalis	0.427619	Enterococcus avium	0.06693	Oscillibacter valericigenes	0.062638	Culturomica massiliensis	0.05678	Faecalibacterium prausnitzii	0.037699	Acetivibrio thermocellus	0.030391	Ihubacter massiliensis	0.025461	Dorea formicigenerans	0.018617	Ruthenibacterium lactatiformans	0.018617	Christensenella minuta	0.016239	Alistipes shahii	0.015949	Enterocloster citroniae	0.014615
Polymicrobial	21M2019405	3	Streptococcus dysgalactiae	0.587462	Morganella morganii	0.322697	Proteus mirabilis	0.089841
Polymicrobial	21M2019210	32	Parvimonas micra	0.320236	Prevotella oris	0.137038	Porphyromonas endodontalis	0.133762	Peptostreptococcus stomatis	0.113808	Prevotella dentalis	0.109863	Dialister pneumosintes	0.043871	Enterocloster clostridioformis	0.02323	Lancefieldella rimae	0.02198	Mogibacterium timidum	0.010532	Peptostreptococcus anaerobius	0.010056	Solobacterium moorei	0.009581	Prevotella dentasini	0.009334
None	21M2019552	9	Acinetobacter johnsonii	0.466973	Sphingobacterium nematocida	0.115451	Fusobacterium nucleatum	0.096496	Sphingomonas glacialis	0.079265	Cutibacterium acnes	0.075818	Stenotrophomonas acidaminiphila	0.0695	Escherichia fergusonii	0.033889	Pseudomonas balearica	0.033314	Lactobacillus delbrueckii	0.029294
None	21M2019523	2	Pelomonas saccharophila	0.556338	Sediminibacterium magnilacihabitans	0.443662
Monomicrobial	21M2019662	18	Enterococcus faecalis	0.96057	Prevotella dentalis	0.007008	Porphyromonas endodontalis	0.004813	Comamonas phosphati	0.003393	Lancefieldella rimae	0.003393	Dialister invisus	0.003383	Peptostreptococcus stomatis	0.003383	Pelomonas saccharophila	0.002789	Parvimonas micra	0.001621	Labilithrix luteola	0.001561	Prevotella oris	0.001309	Cutibacterium acnes	0.001188
Monomicrobial	21M2019620	20	Prevotella oris	0.171438	Prevotella dentalis	0.124509	Staphylococcus saccharolyticus	0.10924	Bacillus cereus	0.08207	Moraxella osloensis	0.080723	Parvimonas micra	0.073762	Leuconostoc citreum	0.064107	Sphingomonas echinoides	0.049624	Porphyromonas endodontalis	0.041204	Dialister pneumosintes	0.040979	Solobacterium moorei	0.038621	Lancefieldella rimae	0.025373
Polymicrobial	21M2019516	20	Finegoldia magna	0.306715	Prevotella bivia	0.179084	Peptoniphilus coxii	0.15827	Anaerococcus obesiensis	0.138928	Dialister invisus	0.097745	Peptoniphilus harei	0.052555	Peptoniphilus lacrimalis	0.019055	Peptoniphilus phoceensis	0.008998	Peptoniphilus grossensis	0.007832	Anaerococcus vaginalis	0.007355	Dialister micraerophilus	0.005341	Dialister propionicifaciens	0.004123
Monomicrobial	21M2019579	7	Burkholderia mallei	0.971872	Comamonas terrigena	0.005915	Pelomonas saccharophila	0.005811	Caulobacter segnis	0.005227	Mobilisporobacter senegalensis	0.005192	Delftia lacustris	0.003439	Melaminivora jejuensis	0.002545
Monomicrobial	21M2019495	2	Bacillus cereus	0.942234	Massilia timonae	0.057766
None	21M2019465	3	Cutibacterium acnes	0.534426	Paracoccus chinensis	0.242623	Staphylococcus hominis	0.222951
None	21M2019576	11	Escherichia fergusonii	0.720859	Moraxella osloensis	0.154048	Pelomonas saccharophila	0.042945	Kocuria rhizophila	0.013916	Streptococcus thermophilus	0.011671	Cutibacterium acnes	0.010549	Acinetobacter johnsonii	0.010325	Roseomonas mucosa	0.01025	Pseudomonas extremaustralis	0.010175	Dermacoccus nishinomiyaensis	0.010025	Sediminibacterium salmoneum	0.005237
Monomicrobial	21M2019840	11	Klebsiella pneumoniae	0.651107	Haemophilus influenzae	0.151812	Parvimonas micra	0.089361	Veillonella parvula	0.058006	Fusobacterium nucleatum	0.018381	Peptostreptococcus stomatis	0.011691	Bacteroides heparinolyticus	0.010323	Campylobacter concisus	0.003313	Pelomonas saccharophila	0.002201	Aquitalea magnusonii	0.001988	Cutibacterium acnes	0.001817
Monomicrobial	21M2020008	10	Staphylococcus aureus	0.98276	Burkholderia lata	0.003456	Methylobacterium goesingense	0.002951	Sediminibacterium magnilacihabitans	0.002245	Streptococcus oralis	0.002076	Sphingomonas echinoides	0.002023	Acinetobacter schindleri	0.001349	Pelomonas saccharophila	0.001222	Megasphaera elsdenii	0.001106	Staphylococcus saccharolyticus	0.000811
Monomicrobial	21M2019761	7	Enterococcus faecalis	0.980089	Sediminibacterium magnilacihabitans	0.005973	Acinetobacter johnsonii	0.004098	Pelomonas saccharophila	0.003405	Labilithrix luteola	0.002366	Steroidobacter agariperforans	0.002222	Brevundimonas nasdae
Monomicrobial	21M2020019	12	Enterococcus faecalis	0.752122	Yokenella regensburgei	0.047434	Pelomonas saccharophila	0.039026	Klebsiella oxytoca	0.031173	Acinetobacter lwoffii	0.026969	Sphingomonas echinoides	0.020941	Sediminibacterium magnilacihabitans	0.017689	Sediminibacterium salmoneum	0.017213	Peptoniphilus harei	0.016181	Sphingomonas phyllosphaerae	0.015864	Cutibacterium acnes	0.009915	Sphingomonas colocasiae	0.005473
Monomicrobial	21M2020108	7	Salmonella enterica	0.304574	Sorangium cellulosum	0.186417	Alkalihalobacillus halodurans	0.165627	Streptococcus mitis	0.156272	Enterococcus faecium	0.092516	Brevundimonas lenta	0.065142	Acinetobacter johnsonii	0.029453
Monomicrobial	21M2020167	13	Stenotrophomonas maltophilia	0.679085	Pseudomonas aeruginosa	0.217698	Enterobacter mori	0.045557	Enterococcus faecium	0.013136	Pelomonas saccharophila	0.010062	Haemophilus parainfluenzae	0.009587	Methylobacterium goesingense	0.005646	Bradyrhizobium mercantei	0.005618	Burkholderia stabilis	0.005059	Stenotrophobacter roseus	0.003102	Acinetobacter junii	0.00218	Occallatibacter savannae	0.001817
Monomicrobial	21M2020672	2	Stenotrophomonas maltophilia	0.998401	Paracoccus yeei	0.001599
Polymicrobial	21M2020881	29	Escherichia fergusonii	0.388256	Streptococcus intermedius	0.382549	Oscillibacter valericigenes	0.03783	Porphyromonas endodontalis	0.033369	Aggregatibacter segnis	0.030249	Campylobacter showae	0.029738	Streptococcus constellatus	0.021987	Escherichia marmotae	0.021529	Eisenbergiella massiliensis	0.008422	Eikenella corrodens	0.006644	Ruthenibacterium lactatiformans	0.005079	Extibacter muris	0.004706
Polymicrobial	21M2020959	6	Streptococcus vestibularis	0.508322	Klebsiella pneumoniae	0.488022	Enterococcus faecium	0.001383	Klebsiella aerogenes	0.001163	Staphylococcus saccharolyticus	0.000566	Veillonella dispar	0.000545
Monomicrobial	21M2020722	2	Escherichia fergusonii	0.739913	Escherichia marmotae	0.260087
Monomicrobial	21M2021033	1	Pseudomonas aeruginosa	1
Monomicrobial	21M2021008	20	Acinetobacter johnsonii	0.34475	Escherichia fergusonii	0.089343	Lactobacillus crispatus	0.069674	Streptococcus parasanguinis	0.060671	Pelomonas saccharophila	0.050983	Paracoccus sanguinis	0.04384	Pseudomonas moraviensis	0.041687	Comamonas phosphati	0.037283	Tumebacillus ginsengisoli	0.03699	Moraxella osloensis	0.033761	Cutibacterium acnes	0.031901	Lysobacter helvus	0.030825
Monomicrobial	21M2020506	5	Streptococcus agalactiae	0.994279	Staphylococcus hominis	0.001853	Pelomonas saccharophila	0.001682	Streptococcus thermophilus	0.001148	Salinicoccus roseus	0.001037
Monomicrobial	21M2020378	5	Streptococcus thermophilus	0.562022	Chiayiivirga flava	0.200532	Pseudomonas plecoglossicida	0.150981	Enterococcus faecium	0.043565	Brevundimonas nasdae	0.0429
Monomicrobial	21M2020403	8	Pelomonas saccharophila	0.296715	Moraxella osloensis	0.253936	Staphylococcus saccharolyticus	0.120123	Pseudomonas aeruginosa	0.096167	Streptococcus australis	0.084189	Aquitalea magnusonii	0.051677	Cutibacterium acnes	0.051335	Dermacoccus nishinomiyaensis	0.045859
Polymicrobial	21M2020302	54	Parvimonas micra	0.246296	Peptostreptococcus stomatis	0.121908	Gemella morbillorum	0.086147	Comamonas terrigena	0.082488	Faecalibacterium prausnitzii	0.05873	Fusobacterium nucleatum	0.04704	Aggregatibacter segnis	0.036141	Dialister pneumosintes	0.031865	Bacteroides fragilis	0.028586	Oscillibacter valericigenes	0.028088	Prevotella intermedia	0.027027	Porphyromonas endodontalis	0.026659
Monomicrobial	21M2021728	7	Enterococcus faecalis	0.696703	Enterococcus faecium	0.291119	Acinetobacter seohaensis	0.004805	Comamonas terrigena	0.002461	Pelomonas saccharophila	0.002012	Staphylococcus saccharolyticus	0.00168	Cutibacterium acnes	0.00122
Monomicrobial	21M2022073	6	Enterococcus faecalis	0.980206	Enterococcus faecium	0.011494	Comamonas phosphati	0.005604	Paenibacillus periandrae	0.00138	Acinetobacter seohaensis	0.000754	Melaminivora jejuensis	0.000563
Monomicrobial	21M2022253	8	Enterococcus faecium	0.879125	Comamonas terrigena	0.067912	Melaminivora jejuensis	0.026471	Pelomonas saccharophila	0.008852	Bradyrhizobium mercantei	0.006986	Paracoccus chinensis	0.005272	Brevundimonas nasdae	0.004014	Cutibacterium acnes	0.001367
Monomicrobial	21M2021772	9	Enterococcus faecium	0.687803	Pseudomonas aeruginosa	0.232152	Comamonas terrigena	0.033481	Acinetobacter seohaensis	0.01719	Pseudoxanthomonas taiwanensis	0.00976	Pelomonas saccharophila	0.007384	Paracoccus chinensis	0.004984	Melaminivora jejuensis	0.004753	Bradyrhizobium mercantei	0.002492
Polymicrobial	21M2021206	18	Helicobacter pylori	0.73052	Streptococcus parasanguinis	0.086998	Streptococcus pneumoniae	0.064066	Streptococcus salivarius	0.048014	Streptococcus oralis	0.01357	Gemella haemolysans	0.010449	Veillonella atypica	0.009693	Veillonella dispar	0.007589	Granulicatella elegans	0.007281	Megasphaera micronuciformis	0.003759	Enterococcus faecium	0.003404	Streptococcus anginosus	0.002931
Polymicrobial	21M2021721	49	Parvimonas micra	0.227915	Peptostreptococcus stomatis	0.177606	Porphyromonas gingivalis	0.151658	Gemella morbillorum	0.130875	Fusobacterium nucleatum	0.085261	Oscillibacter valericigenes	0.079669	Escherichia fergusonii	0.051457	[Eubacterium] nodatum	0.020334	Bacteroides fragilis	0.008368	Peptostreptococcus anaerobius	0.005801	Christensenella massiliensis	0.003871	Ihubacter massiliensis	0.003307
Monomicrobial	21M2021332	7	Enterococcus faecalis	0.674584	Enterococcus faecium	0.245897	Enterococcus hirae	0.074179	Staphylococcus pasteuri	0.003099	Acinetobacter johnsonii	0.000859	Melaminivora jejuensis	0.000696	Bradyrhizobium mercantei	0.000685
Monomicrobial	22M2100221	1	Enterococcus faecalis	1
Polymicrobial	22M2100172	45	Aggregatibacter segnis	0.317216	Campylobacter showae	0.224666	Pseudoramibacter alactolyticus	0.055066	Peptostreptococcus stomatis	0.042861	Parvimonas micra	0.042768	Gemella morbillorum	0.040623	Pyramidobacter piscolens	0.037204	Oscillibacter valericigenes	0.031931	Porphyromonas gingivalis	0.030335	Ihubacter massiliensis	0.029123	Bacteroides fragilis	0.020483	Streptococcus constellatus	0.020472
Monomicrobial	22M2100189	11	Cutibacterium acnes	0.456782	Staphylococcus saccharolyticus	0.269432	Corynebacterium tuscaniense	0.054011	Bradyrhizobium mercantei	0.046105	Corynebacterium ureicelerivorans	0.036333	Aliterella antarctica	0.034201	Corynebacterium pilbarense	0.027805	Finegoldia magna	0.027361	Staphylococcus lugdunensis	0.025229	Corynebacterium casei	0.012081	Corynebacterium tuberculostearicum	0.01066
Monomicrobial	22M2100166	2	Acinetobacter septicus	0.705056	Variovorax ginsengisoli	0.294944
Monomicrobial	22M2000452	9	Campylobacter subantarcticus	0.738901	Comamonas terrigena	0.096592	Melaminivora jejuensis	0.044396	Comamonas nitrativorans	0.038277	Pseudoxanthomonas taiwanensis	0.023878	Aquincola tertiaricarbonis	0.019798	Pseudomonas oleovorans	0.014159	Acinetobacter baumannii	0.012839	Snodgrassella alvi	0.011159
Polymicrobial	22M2100180	35	Peptostreptococcus stomatis	0.456165	Gemella morbillorum	0.235503	Escherichia fergusonii	0.045537	Pyramidobacter piscolens	0.040156	Filifactor alocis	0.037061	Streptococcus intermedius	0.034621	Odoribacter splanchnicus	0.026033	Phascolarctobacterium faecium	0.025756	Porphyromonas gingivalis	0.017557	Bacteroides fragilis	0.016726	Peptostreptococcus anaerobius	0.012463	Ihubacter massiliensis	0.006959
Monomicrobial	22M2100137	2	Escherichia fergusonii	0.997272	Escherichia marmotae	0.002728
Monomicrobial	22M2100085	1	Staphylococcus aureus	1
Monomicrobial	22M2100052	1	Streptococcus sanguinis	1
Polymicrobial	22M2000213	16	Staphylococcus aureus	0.896338	Pseudoglutamicibacter cumminsii	0.039145	Corynebacterium amycolatum	0.018497	Enterococcus faecalis	0.015139	Brevibacterium ravenspurgense	0.012757	Helcobacillus massiliensis	0.006283	Staphylococcus haemolyticus	0.003468	Corynebacterium tuberculostearicum	0.001297	Comamonas phosphati	0.001066	Moraxella osloensis	0.001035	Variovorax ginsengisoli	0.000895	Finegoldia magna	0.000854
Polymicrobial	22M2100020	11	Pseudomonas aeruginosa	0.840488	Moraxella osloensis	0.092306	Schlegelella aquatica	0.015344	Arboricoccus pini	0.011635	Escherichia fergusonii	0.008262	Agrobacterium tumefaciens	0.008214	Staphylococcus saccharolyticus	0.007419	Cutibacterium acnes	0.006769	Cloacibacterium normanense	0.004167	Paracoccus marinus	0.00277	Paracoccus sanguinis	0.002626
Polymicrobial	22M2100022	28	Haemophilus parainfluenzae	0.364259	Fusobacterium varium	0.19404	Bacteroides fragilis	0.174024	Streptococcus mitis	0.065821	Phascolarctobacterium faecium	0.053416	Gemella sanguinis	0.041021	Anaerotignum faecicola	0.029327	Dorea formicigenerans	0.018634	Ruthenibacterium lactatiformans	0.008734	Streptococcus australis	0.007126	Haemophilus sputorum	0.004682	Cupidesulfovibrio oxamicus	0.004548
Monomicrobial	22M2100011	1	Streptococcus dysgalactiae	1
Polymicrobial	22M2100023	99	Oscillibacter valericigenes	0.163526	Faecalibacterium prausnitzii	0.132686	Phascolarctobacterium faecium	0.092314	Escherichia fergusonii	0.062457	Anaerotignum faecicola	0.055717	Eubacterium limosum	0.035948	Christensenella massiliensis	0.027112	Odoribacter splanchnicus	0.026938	Pseudomonas aeruginosa	0.0197	Sporobacter termitidis	0.017105	Extibacter muris	0.017082	Christensenella timonensis	0.016793
Monomicrobial	22M2100035	6	Pseudomonas aeruginosa	0.850853	Pelomonas saccharophila	0.052494	Achromobacter kerstersii	0.04533	Citrobacter murliniae	0.025922	Pseudomonas chengduensis	0.013156	Brevundimonas nasdae	0.012244
Polymicrobial	22M2100951	4	Escherichia fergusonii	0.867914	Escherichia marmotae	0.125114	Enterococcus faecalis	0.005631	Shigella boydii	0.001341
Monomicrobial	22M2100886	3	Staphylococcus saccharolyticus	0.967742	Schlegelella thermodepolymerans	0.016346	Delftia lacustris	0.015912
Monomicrobial	22M2100935	14	Escherichia fergusonii	0.289838	Proteus mirabilis	0.180096	Pseudomonas plecoglossicida	0.124775	Halomonas muralis	0.050511	Bacillus cereus	0.047805	Calidifontibacillus oryziterrae	0.047204	Salmonella enterica	0.047204	Staphylococcus pseudintermedius	0.040289	Acinetobacter baumannii	0.039988	Acinetobacter junii	0.035478	Acinetobacter soli	0.029164	Schlegelella aquatica	0.026759
Monomicrobial	22M2100873	10	Staphylococcus haemolyticus	0.823238	Staphylococcus croceilyticus	0.143972	Pelomonas saccharophila	0.011494	Staphylococcus saprophyticus	0.005999	Kocuria marina	0.00504	Cutibacterium acnes	0.003203	Paenibacillus thailandensis	0.00239	Delftia lacustris	0.002308	Thermus thermophilus	0.001414	Gloeocapsopsis crepidinum	0.000943
Monomicrobial	22M2100945	8	Streptococcus sanguinis	0.872404	Microbacterium testaceum	0.036917	Pantoea ananatis	0.030918	Marmoricola bigeumensis	0.019382	Janthinobacterium rivuli	0.015228	Methylobacterium goesingense	0.012114	Cutibacterium acnes	0.006576	Enterocloster asparagiformis	0.006461
Polymicrobial	22M2101036	52	Parvimonas micra	0.603009	[Eubacterium] brachy	0.066328	Oscillibacter valericigenes	0.057136	Aminipila butyrica	0.033485	Dialister pneumosintes	0.031474	Mogibacterium timidum	0.02682	Mycoplasma salivarium	0.026441	Fusobacterium mortiferum	0.024335	Bulleidia extructa	0.021776	Porphyromonas endodontalis	0.01749	Prevotella oris	0.010456	[Eubacterium] minutum	0.009182
Monomicrobial	22M2101085	1	Streptococcus dysgalactiae	1
Monomicrobial	22M2100918	2	Enterococcus faecalis	0.783282	Janthinobacterium rivuli	0.216718
Polymicrobial	22M2101062	12	Klebsiella pneumoniae	0.928147	Veillonella parvula	0.026855	Haemophilus parainfluenzae	0.013129	Streptococcus gordonii	0.007129	Haemophilus haemolyticus	0.006434	Granulicatella elegans	0.006131	Streptococcus parasanguinis	0.003895	Campylobacter concisus	0.003168	Streptococcus oralis	0.001801	Veillonella tobetsuensis	0.001421	Streptococcus salivarius	0.001085	Mogibacterium neglectum	0.000803
Monomicrobial	22M2100924	N/A	Failed
Polymicrobial	22M2100895	11	Parvimonas micra	0.452231	Bacteroides fragilis	0.222513	Peptostreptococcus anaerobius	0.188116	Fusobacterium nucleatum	0.050926	Escherichia fergusonii	0.031103	Dialister micraerophilus	0.023826	Peptoniphilus harei	0.021485	Bacteroides ovatus	0.005746	Eggerthella lenta	0.001915	Proteus mirabilis	0.001115	Erysipelatoclostridium ramosum	0.001024
Monomicrobial	22M2100890	9	Staphylococcus haemolyticus	0.446322	Planomicrobium chinense	0.170892	Planomicrobium glaciei	0.090454	Azospirillum thermophilum	0.074178	Sphingomonas panni	0.070423	Rubellimicrobium roseum	0.068545	Staphylococcus pasteuri	0.03349	Moraxella osloensis	0.029734	Pelomonas saccharophila	0.015962
Polymicrobial	22M2101647	66	Parvimonas micra	0.187513	Filifactor alocis	0.118526	Gemella morbillorum	0.111862	Streptococcus intermedius	0.082656	Peptostreptococcus stomatis	0.080469	Campylobacter rectus	0.042824	Porphyromonas endodontalis	0.033756	[Eubacterium] nodatum	0.033601	Phocaeicola abscessus	0.028391	Phascolarctobacterium faecium	0.024419	Tannerella forsythia	0.02218	Porphyromonas gingivalis	0.020509
Monomicrobial	22M2101674	11	Staphylococcus saccharolyticus	0.61586	Escherichia fergusonii	0.129017	Klebsiella pneumoniae	0.079059	Escherichia marmotae	0.047047	Massilia terrae	0.029101	Proteus mirabilis	0.022796	Citrobacter braakii	0.021705	Delftia lacustris	0.019522	Deinococcus aetherius	0.015885	Brucella lupini	0.012368	Roseomonas mucosa	0.007639
Monomicrobial	22M2101641	3	Citrobacter koseri	0.99203	Massilia terrae	0.004295	Pelomonas saccharophila	0.003675
Monomicrobial	22M2101576	6	Enterococcus faecium	0.215859	Lysobacter spongiicola	0.176211	Klebsiella pneumoniae	0.167401	Escherichia fergusonii	0.151982	Pelomonas saccharophila	0.147577	Sphingomonas echinoides	0.140969
Polymicrobial	22M2101573	60	Parvimonas micra	0.269586	Mogibacterium timidum	0.174829	Peptostreptococcus stomatis	0.102143	Faecalibacterium prausnitzii	0.064383	Escherichia fergusonii	0.049931	Phascolarctobacterium faecium	0.046862	Pyramidobacter piscolens	0.041288	Dialister pneumosintes	0.037302	Anaerotignum faecicola	0.019163	Oscillibacter valericigenes	0.01879	Ruthenibacterium lactatiformans	0.015145	[Eubacterium] nodatum	0.014452
Monomicrobial	22M2101540	5	Corynebacterium striatum	0.429695	Klebsiella pneumoniae	0.255402	Escherichia fergusonii	0.16554	Escherichia marmotae	0.141496	Salmonella enterica	0.007867
Polymicrobial	22M2101506	70	Pyramidobacter piscolens	0.312006	Bacteroides fragilis	0.174204	Fusobacterium varium	0.085223	Phocaeicola vulgatus	0.070293	Anaerotignum lactatifermentans	0.036139	Escherichia fergusonii	0.032949	Phascolarctobacterium faecium	0.031328	Christensenella massiliensis	0.023975	Proteus mirabilis	0.020004	Cloacibacillus evryensis	0.018586	Frisingicoccus caecimuris	0.016672	Oscillibacter valericigenes	0.012286
Polymicrobial	22M2101520	9	Streptococcus mitis	0.729302	Streptococcus salivarius	0.151175	Streptococcus pneumoniae	0.05469	Streptococcus oralis	0.044464	Streptococcus gordonii	0.011309	Klebsiella pneumoniae	0.003982	Escherichia fergusonii	0.002506	[Eubacterium] rectale	0.00153	Streptococcus anginosus	0.001043
Monomicrobial	22M2101703	2	Staphylococcus aureus	0.998075	Escherichia fergusonii	0.001925
Monomicrobial	22M2101676	6	Staphylococcus saccharolyticus	0.851843	Escherichia marmotae	0.066146	Escherichia fergusonii	0.05946	Klebsiella pneumoniae	0.012335	Citrobacter murliniae	0.006968	Populibacterium corticicola	0.003248
Monomicrobial	22M2101690	8	Staphylococcus saccharolyticus	0.708601	Aeromonas enteropelogenes	0.140708	Escherichia marmotae	0.055381	Escherichia fergusonii	0.041296	Pseudomonas chengduensis	0.02393	Citrobacter murliniae	0.012033	Proteus mirabilis	0.009572	Leclercia adecarboxylata	0.008478
Polymicrobial	22M2101430	13	Prevotella denticola	0.366769	Parvimonas micra	0.226963	Dialister pneumosintes	0.163817	Dialister invisus	0.118124	Gemella morbillorum	0.047464	Fusobacterium nucleatum	0.038824	Streptococcus intermedius	0.014297	Campylobacter gracilis	0.011152	[Eubacterium] brachy	0.005775	Gemella palaticanis	0.002243	Gemella haemolysans	0.001911	Prevotella intermedia	0.001513
Monomicrobial	22M2101288	N/A	Failed
Polymicrobial	22M2101437	6	Klebsiella pneumoniae	0.482089	Escherichia marmotae	0.456624	Escherichia fergusonii	0.046229	Citrobacter amalonaticus	0.013626	Kosakonia sacchari	0.000773	Salmonella enterica	0.000658
Monomicrobial	22M2101414	4	Fusobacterium nucleatum	0.692566	Streptococcus intermedius	0.227133	[Eubacterium] brachy	0.07912	Streptococcus constellatus	0.001182
Polymicrobial	22M2101404	2	Neisseria sicca	0.891003	Klebsiella pneumoniae	0.108997
Polymicrobial	22M2101351	1	Klebsiella pneumoniae	1
Monomicrobial	22M2101301	2	Pantoea stewartii	0.967949	Erwinia tasmaniensis	0.032051
Monomicrobial	22M2101395	5	Citrobacter murliniae	0.991344	Cnuella takakiae	0.003123	Pseudomonas aeruginosa	0.002233	Paraburkholderia dipogonis	0.001818	Sphingomonas aquatilis	0.001482
Monomicrobial	22M2101259	N/A	Failed
Monomicrobial	22M2101274	3	Klebsiella pneumoniae	0.479021	Enterococcus faecalis	0.364802	Bradyrhizobium mercantei	0.156177
Monomicrobial	22M2101508	8	Staphylococcus lugdunensis	0.983882	Klebsiella pneumoniae	0.003539	Novosphingobium guangzhouense	0.002976	Paracoccus chinensis	0.002795	Alkanindiges illinoisensis	0.002457	Pseudomonas oleovorans	0.001894	Glaciihabitans tibetensis	0.00124	Xanthomonas campestris	0.001217
Polymicrobial	22M2101341	5	Enterococcus faecalis	0.682728	Cutibacterium acnes	0.108228	Stenotrophomonas maltophilia	0.103781	Escherichia marmotae	0.061527	Staphylococcus saccharolyticus	0.043736
Monomicrobial	22M2101384	1	Klebsiella pneumoniae	1
Monomicrobial	22M2101478	5	Enterococcus faecium	0.460811	Sphingomonas lutea	0.163514	Escherichia fergusonii	0.160811	Acinetobacter johnsonii	0.140541	Moraxella osloensis	0.074324
Monomicrobial	22M2101470	6	Staphylococcus lugdunensis	0.914193	Delftia lacustris	0.036995	Brachybacterium faecium	0.016739	Bradyrhizobium mercantei	0.015473	Sphingopyxis alaskensis	0.009003	Pseudomonas plecoglossicida	0.007596
Monomicrobial	22M2102932	1	Staphylococcus aureus	1
Polymicrobial	22M2103050	12	Filifactor alocis	0.679888	Fusobacterium nucleatum	0.167866	Treponema socranskii	0.090229	Finegoldia magna	0.020819	Campylobacter rectus	0.016409	Fretibacterium fastidiosum	0.009872	Tannerella forsythia	0.006362	[Eubacterium] saphenum	0.002084	Ihubacter massiliensis	0.001865	Actinomyces israelii	0.001711	Clostridium formicaceticum	0.001601	Treponema maltophilum	0.001294
Polymicrobial	22M2103124	2	Klebsiella pneumoniae	0.976851	Streptococcus salivarius	0.023149
Monomicrobial	22M2103142	2	Escherichia fergusonii	0.997484	Comamonas terrigena	0.002516
Monomicrobial	22M2009749	2	Paraclostridium benzoelyticum	0.810579	Paraclostridium bifermentans	0.189421
Monomicrobial	22M2103182	1	Klebsiella pneumoniae	1
